# Supplementary material
Source: PubMed Central journal article supplement (PMC3018568)

# THE LANCET

## **Supplementary webappendix**

This webappendix formed part of the original submission and has been peer reviewed. We post it as supplied by the authors.

Supplement to: Coleman MP, Forman D, Bryant H, et al. Cancer survival in Australia, Canada, Denmark, Norway, Sweden, and the UK, 1995–2007 (the International Cancer Benchmarking Partnership): an analysis of population-based cancer registry data. *Lancet* 2010; published online Dec 22. DOI:10.1016/S0140-6736(10)62231-3

## **Cancer survival in Australia, Canada, Denmark, Norway, Sweden and the UK, 1995-2007 (the International Cancer Benchmarking Partnership): an analysis of population-based cancer registry data**

**Programme Board:** Ole Andersen (National Board of Health, Health Planning Division, Copenhagen, Denmark); Heather Bryant (Canadian Partnership Against Cancer, Toronto ON, Canada); David Currow (Cancer Institute NSW, Sydney NSW, Australia); Anna Gavin (Northern Ireland Cancer Registry, Belfast, Northern Ireland, UK); Gunilla Gunnarsson (Swedish Association of Local Authorities and Regions, Stockholm, Sweden); Jane Hanson (Cancer Services Co-ordinating Group, Cardiff, Wales, UK); David Hill (Cancer Council Victoria, Melbourne VIC, Australia); Stein Kaasa (University Hospital of Trondheim, Trondheim, Norway); Lone de Neergaard (National Board of Health, Health Planning Division, Copenhagen, Denmark); Michael A Richards (National Cancer Action Team, Department of Health, London, UK; Chair); Terry Sullivan (Cancer Care Ontario, Toronto ON, Canada); **Module 1 leaders:** Jan Adolfsson (Karolinska University Hospital, Stockholm, Sweden); Heather Bryant (Canadian Partnership Against Cancer, Toronto ON, Canada); Michael Coory (Cancer Council Victoria, Melbourne VIC, Australia); David Forman (International Agency for Research on Cancer, Lyon, France; Chair); Marianne L Gjerstorff (Danish Cancer Registry, National Board of Health, Copenhagen, Denmark); Tom Borge Johannesen (Norwegian Cancer Registry, Oslo, Norway); Mats Lambe (Regional Oncological Centre, Uppsala University Hospital, Uppsala, and Karolinska Institutet, Stockholm, Sweden); David Meechan (Trent Cancer Registry, Sheffield, UK); Richard Middleton (Northern Ireland Cancer Registry, Belfast, Northern Ireland, UK); Janey Shin (Canadian Partnership Against Cancer, Toronto ON, Canada); John Steward (Welsh Cancer Intelligence and Surveillance Unit, Cardiff, Wales, UK); Elizabeth Tracey (Cancer Institute NSW, Sydney NSW, Australia); **Cancer registries:** Juanita Hatcher, Carol Russell (Alberta Health Services, Edmonton AB, Canada); Andy Coldman, Mark Elwood, David Levy, Colleen E McGahan (British Columbia Cancer Agency, Vancouver BC, Canada); Dhali Dhaliwal, Donna Turner (CancerCare Manitoba, Winnipeg MB, Canada); Loraine Marrett, John McLaughlin, Kamini Milnes, Diane Nishri, Michael Sherar (Cancer Care Ontario, Toronto ON, Canada); Gerda Engholm (Department of Cancer Prevention and Documentation, Danish Cancer Society, Copenhagen, Denmark); Eva Morris, James Thomas (Northern and Yorkshire Cancer Registration and Information Service, Leeds, UK); Karen Linklater (Thames Cancer Registry, London, UK); Rebecca Elleray, David Meechan, Andy Smith (Trent Cancer Registry); Gill Lawrence (West Midlands Cancer Intelligence Unit, Birmingham, UK); Finian Bannon, Colin Fox (Northern Ireland Cancer Registry, Belfast, Northern Ireland, UK); Ceri White (Welsh Cancer Intelligence and Surveillance Unit, Cardiff, Wales, UK); **Clinical Committee:** Jonas Bergh (Karolinska Institutet, Stockholm, Sweden); John Boyages (Westmead Breast Cancer Institute, Sydney NSW, Australia); Michel Boyer (Sydney Cancer Centre, Sydney NSW, Australia); John Butler (Department of Health, London, UK); Peter Clark (Clatterbridge Centre for Oncology, Liverpool, UK); Bill Evans (Juravinski Cancer Centre at Hamilton Health Sciences, Cancer Care Ontario, Toronto ON, Canada); Hilary Fielder (Velindre NHS Trust, Cardiff, Wales, UK); Tony Fields (Alberta Health Services, Edmonton AB, Canada); Paul Finan (Leeds Teaching Hospitals NHS Trust, Leeds, UK); Tommy Fornander (Södersjukhuset, Stockholm, Sweden); Neville Hacker (University of New South Wales and Royal Hospital for Women, Sydney NSW, Australia); Louise Hanna (Velindre NHS Trust, Cardiff, Wales, UK); Thomas Hogberg (Skåne University Hospital, Lund, Sweden); Charlotte Hosbond (National Board of Health, Copenhagen, Denmark); Karl Kölbeck (Karolinska University Hospital, Stockholm, Sweden); Martin Lee (University Hospitals Coventry and Warwickshire NHS Trust, Coventry, UK); Peter Barrett Lee (Velindre NHS Trust, Cardiff, Wales, UK); Jason Lester (Velindre NHS Trust, Cardiff, Wales, UK); Mark Levine (McMaster University, Hamilton ON, Canada); Gudrun Lindmark (Skåne University Hospital, Malmö-Lund, Sweden); Tim Maughan (Velindre NHS Trust, Cardiff, Wales, UK); Usha Menon (University College London, London, UK); Ian Money Penny (Cardiff & Vale NHS Trust, Cardiff, Wales, UK); Andy Nordin (East Kent University Hospitals, Canterbury, UK); Julietta Patnick (NHS Cancer Screening, Sheffield, UK); Mick Peake (NHS Cancer Improvement, National Cancer Intelligence Network, Department of Respiratory Medicine, Leicester, UK); Andrew Radcliffe (Llandough Hospital, Penarth, Wales, UK); Barry Rosen (University of Toronto, Toronto ON, Canada); Annika Sjövall (Karolinska University Hospital, Stockholm, Sweden); Allan Spigelman (University of New South Wales, Sydney NSW, Australia); Gunnar Wagenius (Uppsala University Hospital, Uppsala, Sweden); Fredrik Wärnberg (Uppsala University Hospital, Uppsala, Sweden); Michael Williams (Addenbrooke's, Cambridge, UK); Ian Williamson (Royal Gwent Hospital, Newport, Wales, UK); **Central Analytic Team (Cancer Research UK Cancer Survival Group, London School of Hygiene and Tropical Medicine, London, UK):** Claudia Allemani (also Analytical Epidemiology Unit, Fondazione IRCCS Istituto Nazionale dei Tumori, Milan, Italy), Michel P Coleman, Libby Ellis, Camille Maringe, Ula Nur, Manuela Quaresma, Bernard Rachet, Sarah Walters.

### **Correspondence**

MP Coleman, Cancer Research UK Cancer Survival Group, Department of Non-Communicable Disease Epidemiology, London School of Hygiene and Tropical Medicine, Keppel Street, London WC1E 7HT, UK.

T +44 20 7612 7849, F +44 20 7436 4230, [michel.coleman@lshtm.ac.uk](mailto:michel.coleman@lshtm.ac.uk)

## **Additional references**

1. National Board of Health. National Cancer Plan II - Denmark. Copenhagen, Denmark, National Board of Health, 1 June 2005.
2. Cancer Working Group. Cancer Services - Investing for the Future (The Campbell Report). Belfast, Department of Health and Social Services, 1996.
3. Department of Health. The NHS Cancer Plan. London, Department of Health, 2000.
4. Department of Health. Cancer Reform Strategy. London, Department of Health, June 2007.
5. Cancer Services Co-ordinating Group. Designed to Tackle Cancer in Wales: A Welsh Assembly Government Policy Statement. Welsh Assembly Government, December 2006.  
[http://www.wales.nhs.uk/sites3/Documents/322/D2TC\\_Strategic\\_Framework\\_2008-11.pdf](http://www.wales.nhs.uk/sites3/Documents/322/D2TC_Strategic_Framework_2008-11.pdf)
6. Department of Human Services. Victoria's Cancer Action Plan 2008-2011. Melbourne, Victoria, Victorian Government Department of Human Services, 2008.
7. Anon. National Cancer Strategy 2006-2009. Oslo, Norway, Ministry of Health and Care Services, 2010.  
[http://www.regjeringen.no/upload/kilde/hod/anb/2006/0020/ddd/pdfv/296675-kreftstrategien\\_eng\\_25102006\\_kjb.pdf](http://www.regjeringen.no/upload/kilde/hod/anb/2006/0020/ddd/pdfv/296675-kreftstrategien_eng_25102006_kjb.pdf)
8. Ekos Research Associates. Canadian Partnership Against Cancer Corporation: evaluation. Final report: executive summary. Ottawa ON, Health Canada, 6 May 2010. <http://www.partnershipagainstcancer.ca/wp-content/uploads/CPACC-Evaluation-Executive-Summary.pdf>
9. Commission of Inquiry on a National Cancer Strategy. A national cancer strategy for the future. Swedish Government Official Reports SOU 2009:11. Stockholm, Sweden, Swedish Government Inquiries, 2009.  
<http://www.regeringen.se/content/1/c6/12/09/76/01389b21.pdf>

## Webappendix tables and figures

### Exclusion tables

**Webtable 1:** Ineligible and excluded records, and no. (%) of eligible patients included in analyses, by calendar period of diagnosis (1995-2007), all 12 jurisdictions combined: **colorectal cancer** (1 page)

**Webtable 2:** Ineligible and excluded records, and no. (%) of eligible patients included in analyses, by calendar period of diagnosis (1995-2007), all 12 jurisdictions combined: **lung cancer** (1 page)

**Webtable 3:** Ineligible and excluded records, and no. (%) of eligible patients included in analyses, by calendar period of diagnosis (1995-2007), all 12 jurisdictions combined: **breast cancer (women)** (1 page)

**Webtable 4:** Ineligible and excluded records, and no. (%) of eligible patients included in analyses, by calendar period of diagnosis (1995-2007), all 12 jurisdictions (except Swedish regions) combined: **ovarian cancer** (1 page)

### Number of patients

**Webtable 5:** Number of patients included in the analyses, both overall and 1-year survivors, by calendar period, age, sex, country and jurisdiction: **colorectal cancer** (2 pages)

**Webtable 6:** Number of patients included in the analyses, both overall and 1-year survivors, by calendar period, age, sex, country and jurisdiction: **lung cancer** (2 pages)

**Webtable 7:** Number of patients included in the analyses, both overall and 1-year survivors, by calendar period, age, country and jurisdiction: **breast cancer (women)** (2 pages)

**Webtable 8:** Number of patients included in the analyses, both overall and 1-year survivors, by calendar period, age, country and jurisdiction: **ovarian cancer** (2 pages)

### Age at diagnosis

**Webtable 9:** Mean age at diagnosis: cancer, jurisdiction and calendar period of diagnosis (1 page)

### Second and higher-order primary

**Webtable 10:** Number and percentage of adults (15-99 years) diagnosed during 1995-2007 whose cancer was a second or higher-order primary: by cancer and jurisdiction (1 page)

### Patients dying within a month

**Webtable 11:** Number and percentage of patients dying within a month of diagnosis, by period of diagnosis and jurisdiction (1 page)

## **Survival by age and calendar period of diagnosis**

**Webtable 12:** Number of patients, age-standardised and age-specific relative survival estimates (%) at one and five years, and at 5 years conditional on survival to the first anniversary of diagnosis: cancer and jurisdiction, **cohort analysis for 1995-99** (2 pages)

**Webtable 13:** Number of patients, age-standardised and age-specific relative survival estimates (%) at one and five years, and at 5 years conditional on survival to the first anniversary of diagnosis: cancer and jurisdiction, **cohort analysis for 2000-02** (2 pages)

**Webtable 14:** Number of patients, age-standardised and age-specific relative survival estimates (%) at one and five years, and at 5 years conditional on survival to the first anniversary of diagnosis: cancer and jurisdiction, **period analysis for 2005-07** (2 pages)

## **Incidence and mortality**

**Webtable 15:** Age-standardised (world) annual incidence and mortality rates per 100,000 in 2000, with mortality-incidence ratios: cancer and country (1 page)

## **Annex figures**

### **Incidence and mortality trends**

**Incidence and mortality trends 1985-2005: three-year moving average world-standardised rates per 100,000 per year** (1 page)

Notes: Incidence data for Canada exclude Quebec; colorectal cancer includes cancers of the anus and anal canal; lung cancer includes cancers of the trachea. Mortality data labelled UK are for England and Wales only

**Webfigure 1 – Ovarian cancer, incidence**

**Webfigure 2 – Lung cancer, incidence, males**

**Webfigure 3 – Lung cancer, incidence, females**

**Webfigure 4 – Ovarian cancer, mortality**

**Webfigure 5 – Lung cancer, mortality, males**

**Webfigure 6 – Lung cancer, mortality, females**

## **Available on request**

### **Exclusion tables**

**Annex Table 1:** Ineligible and excluded records, and no. (%) of eligible patients included in analyses, by calendar period of diagnosis (1995-2007): by cancer and jurisdiction (47 pages)

### **Survival by age and calendar period of diagnosis**

**Annex Table 2:** One-year, five-year and conditional five-year relative survival (%), with 95% confidence intervals (CI), for adults (15-99 years) diagnosed with cancer during 1995-99: by cancer, age, sex, country and jurisdiction (14 pages)

**Annex Table 3:** One-year, five-year and conditional five-year relative survival (%), with 95% confidence intervals (CI), for adults (15-99 years) diagnosed with cancer during 2000-02: by cancer, age, sex, country and jurisdiction (14 pages)

**Annex Table 4:** One-year, five-year and conditional five-year relative survival (%), with 95% confidence intervals (CI), for adults (15-99 years), period analysis for 2005-07: by cancer, age, sex, country and jurisdiction (14 pages)

**Table 1: Ineligible and excluded records, and no. (%) of eligible patients included in analyses, by calendar period of diagnosis (1995-2007), all 12 jurisdictions combined: colorectal cancer**

|                                        | 1995-96        |                 |              | 1997-98        |                 |              | 1999-2000      |                 |              | 2001-02        |                 |              |
|----------------------------------------|----------------|-----------------|--------------|----------------|-----------------|--------------|----------------|-----------------|--------------|----------------|-----------------|--------------|
| <b>Total registered</b>                | <b>109,281</b> | <b>108,046</b>  | <b>100.0</b> | <b>117,134</b> | <b>115,752</b>  | <b>100.0</b> | <b>122,127</b> | <b>120,631</b>  | <b>100.0</b> | <b>122,529</b> | <b>120,970</b>  | <b>100.0</b> |
| <b>Ineligible</b>                      | <b>Records</b> | <b>Patients</b> | <b>%</b>     |
| Incomplete data                        | 61             | 61              | <0.1         | 37             | 37              | <0.1         | 33             | 33              | <0.1         | 12             | 12              | <0.1         |
| Not resident in England or Wales       | 0              | 0               | 0.0          | 0              | 0               | 0.0          | 0              | 0               | 0.0          | 0              | 0               | 0.0          |
| In situ neoplasm                       | 391            | 356             | 0.3          | 553            | 497             | 0.4          | 712            | 649             | 0.5          | 1,082          | 1,016           | 0.8          |
| Benign or uncertain                    | 3,125          | 2,477           | 2.3          | 3,898          | 3,160           | 2.7          | 4,706          | 3,902           | 3.2          | 4,274          | 3,429           | 2.8          |
| Metastatic                             | 50             | 50              | <0.1         | 49             | 49              | <0.1         | 62             | 62              | <0.1         | 62             | 62              | <0.1         |
| Otherwise ineligible                   | 0              | 0               | 0.0          | 0              | 0               | 0.0          | 0              | 0               | 0.0          | 0              | 0               | 0.0          |
| Lymphoma                               | 23             | 22              | <0.1         | 32             | 32              | <0.1         | 25             | 25              | <0.1         | 19             | 19              | <0.1         |
| Leukaemia or myeloma                   | 7              | 7               | <0.1         | 0              | 0               | 0.0          | 0              | 0               | 0.0          | 0              | 0               | 0.0          |
| <b>Total ineligible</b>                |                | <b>2,973</b>    | <b>2.8</b>   |                | <b>3,775</b>    | <b>3.3</b>   |                | <b>4,671</b>    | <b>3.9</b>   |                | <b>4,538</b>    | <b>3.8</b>   |
| <b>Total eligible</b>                  |                | <b>105,073</b>  | <b>100.0</b> |                | <b>111,977</b>  | <b>100.0</b> |                | <b>115,960</b>  | <b>100.0</b> |                | <b>116,432</b>  | <b>100.0</b> |
| Aged 100+                              | 28             | 28              | <0.1         | 38             | 38              | <0.1         | 39             | 39              | <0.1         | 39             | 39              | <0.1         |
| Vital status unknown                   | 182            | 124             | 0.1          | 156            | 121             | 0.1          | 208            | 176             | 0.2          | 149            | 139             | 0.1          |
| Sex not known                          | 1              | 0               | 0.0          | 0              | 0               | 0.0          | 0              | 0               | 0.0          | 0              | 0               | 0.0          |
| Sex-site error                         | 0              | 0               | 0.0          | 0              | 0               | 0.0          | 0              | 0               | 0.0          | 0              | 0               | 0.0          |
| Invalid dates                          | 8              | 7               | <0.1         | 9              | 8               | <0.1         | 22             | 21              | <0.1         | 37             | 35              | <0.1         |
| Death certificate only                 | 3,797          | 3,772           | 3.6          | 3,727          | 3,692           | 3.3          | 2,986          | 2,960           | 2.6          | 2,220          | 2,209           | 1.9          |
| Autopsy only                           | 161            | 155             | 0.1          | 134            | 131             | 0.1          | 121            | 119             | 0.1          | 94             | 91              | <0.1         |
| Synchronous tumours                    | 595            | 296             | 0.3          | 683            | 337             | 0.3          | 1,051          | 767             | 0.7          | 692            | 413             | 0.4          |
| Multiple primary same site             | 544            | 142             | 0.1          | 837            | 365             | 0.3          | 967            | 473             | 0.4          | 1,087          | 573             | 0.5          |
| <b>Total exclusions</b>                |                | <b>4,524</b>    | <b>4.3</b>   |                | <b>4,692</b>    | <b>4.2</b>   |                | <b>4,555</b>    | <b>3.9</b>   |                | <b>3,499</b>    | <b>3.0</b>   |
| <b>Patients available for analyses</b> |                | <b>100,549</b>  | <b>95.7</b>  |                | <b>107,285</b>  | <b>95.8</b>  |                | <b>111,405</b>  | <b>96.1</b>  |                | <b>112,933</b>  | <b>97.0</b>  |

|                                        | 2003-04        |                 |              | 2005-06        |                 |              | 2007           |                 |              | 1995-2007      |                 |              |
|----------------------------------------|----------------|-----------------|--------------|----------------|-----------------|--------------|----------------|-----------------|--------------|----------------|-----------------|--------------|
| <b>Total registered</b>                | <b>126,967</b> | <b>125,035</b>  | <b>100.0</b> | <b>133,227</b> | <b>131,144</b>  | <b>100.0</b> | <b>68,301</b>  | <b>67,483</b>   | <b>100.0</b> | <b>799,566</b> | <b>789,061</b>  | <b>100.0</b> |
| <b>Ineligible</b>                      | <b>Records</b> | <b>Patients</b> | <b>%</b>     |
| Incomplete data                        | 16             | 16              | <0.1         | 10             | 10              | <0.1         | 20             | 20              | <0.1         | 189            | 189             | <0.1         |
| Not resident in England or Wales       | 0              | 0               | 0.0          | 0              | 0               | 0.0          | 0              | 0               | 0.0          | 0              | 0               | 0.0          |
| In situ neoplasm                       | 1,443          | 1,350           | 1.1          | 2,130          | 1,995           | 1.5          | 1,374          | 1,308           | 1.9          | 7,685          | 7,171           | 0.9          |
| Benign or uncertain                    | 4,566          | 3,511           | 2.8          | 4,919          | 3,803           | 2.9          | 2,199          | 1,896           | 2.8          | 27,687         | 22,178          | 2.8          |
| Metastatic                             | 26             | 26              | <0.1         | 20             | 20              | <0.1         | 3              | 3               | <0.1         | 272            | 272             | <0.1         |
| Otherwise ineligible                   | 0              | 0               | 0.0          | 0              | 0               | 0.0          | 0              | 0               | 0.0          | 0              | 0               | 0.0          |
| Lymphoma                               | 25             | 23              | <0.1         | 20             | 20              | <0.1         | 4              | 4               | <0.1         | 148            | 145             | <0.1         |
| Leukaemia or myeloma                   | 1              | 1               | <0.1         | 1              | 1               | <0.1         | 0              | 0               | 0.0          | 9              | 9               | <0.1         |
| <b>Total ineligible</b>                |                | <b>4,927</b>    | <b>3.9</b>   |                | <b>5,849</b>    | <b>4.5</b>   |                | <b>3,231</b>    | <b>4.8</b>   |                | <b>29,964</b>   | <b>3.8</b>   |
| <b>Total eligible</b>                  |                | <b>120,108</b>  | <b>100.0</b> |                | <b>125,295</b>  | <b>100.0</b> |                | <b>64,252</b>   | <b>100.0</b> |                | <b>759,097</b>  | <b>100.0</b> |
| Aged 100+                              | 34             | 33              | <0.1         | 40             | 39              | <0.1         | 27             | 26              | <0.1         | 245            | 242             | <0.1         |
| Vital status unknown                   | 142            | 125             | 0.1          | 120            | 110             | <0.1         | 60             | 40              | <0.1         | 1,017          | 835             | 0.1          |
| Sex not known                          | 1              | 0               | 0.0          | 3              | 0               | 0.0          | 0              | 0               | 0.0          | 5              | 0               | 0.0          |
| Sex-site error                         | 0              | 0               | 0.0          | 0              | 0               | 0.0          | 0              | 0               | 0.0          | 0              | 0               | 0.0          |
| Invalid dates                          | 38             | 36              | <0.1         | 17             | 16              | <0.1         | 198            | 194             | 0.3          | 329            | 317             | <0.1         |
| Death certificate only                 | 2,284          | 2,265           | 1.9          | 2,288          | 2,264           | 1.8          | 1,114          | 1,107           | 1.7          | 18,416         | 18,269          | 2.4          |
| Autopsy only                           | 74             | 73              | <0.1         | 63             | 63              | <0.1         | 41             | 41              | <0.1         | 688            | 673             | <0.1         |
| Synchronous tumours                    | 732            | 411             | 0.3          | 806            | 461             | 0.4          | 425            | 243             | 0.4          | 4,984          | 2,928           | 0.4          |
| Multiple primary same site             | 1,412          | 790             | 0.7          | 1,576          | 907             | 0.7          | 950            | 578             | 0.9          | 7,373          | 3,828           | 0.5          |
| <b>Total exclusions</b>                |                | <b>3,733</b>    | <b>3.1</b>   |                | <b>3,860</b>    | <b>3.1</b>   |                | <b>2,229</b>    | <b>3.5</b>   |                | <b>27,092</b>   | <b>3.6</b>   |
| <b>Patients available for analyses</b> |                | <b>116,375</b>  | <b>96.9</b>  |                | <b>121,435</b>  | <b>96.9</b>  |                | <b>62,023</b>   | <b>96.5</b>  |                | <b>732,005</b>  | <b>96.4</b>  |

**Table 2: Ineligible and excluded records, and no. (%) of eligible patients included in analyses, by calendar period of diagnosis (1995-2007), all 12 jurisdictions combined: lung cancer**

|                                        | 1995-96        |                |              | 1997-98        |                |              | 1999-2000      |                |              | 2001-02        |                |              |
|----------------------------------------|----------------|----------------|--------------|----------------|----------------|--------------|----------------|----------------|--------------|----------------|----------------|--------------|
|                                        | Records        | Patients       | %            |
| <b>Total registered</b>                | <b>114,804</b> | <b>114,702</b> | <b>100.0</b> | <b>114,920</b> | <b>114,816</b> | <b>100.0</b> | <b>116,189</b> | <b>116,064</b> | <b>100.0</b> | <b>115,622</b> | <b>115,497</b> | <b>100.0</b> |
| <b>Ineligible</b>                      |                |                |              |                |                |              |                |                |              |                |                |              |
| Incomplete data                        | 71             | 71             | <0.1         | 47             | 47             | <0.1         | 28             | 28             | <0.1         | 33             | 33             | <0.1         |
| Not resident in England or Wales       | 0              | 0              | 0.0          | 0              | 0              | 0.0          | 0              | 0              | 0.0          | 0              | 0              | 0.0          |
| In situ neoplasm                       | 20             | 17             | <0.1         | 21             | 20             | <0.1         | 23             | 21             | <0.1         | 16             | 13             | <0.1         |
| Benign or uncertain                    | 1,041          | 1,019          | 0.9          | 967            | 941            | 0.8          | 798            | 781            | 0.7          | 461            | 452            | 0.4          |
| Metastatic                             | 386            | 386            | 0.3          | 229            | 229            | 0.2          | 295            | 295            | 0.3          | 275            | 274            | 0.2          |
| Otherwise ineligible                   | 0              | 0              | 0.0          | 0              | 0              | 0.0          | 0              | 0              | 0.0          | 0              | 0              | 0.0          |
| Lymphoma                               | 21             | 21             | <0.1         | 14             | 14             | <0.1         | 18             | 18             | <0.1         | 17             | 17             | <0.1         |
| Leukaemia or myeloma                   | 7              | 7              | <0.1         | 1              | 1              | <0.1         | 1              | 1              | <0.1         | 5              | 5              | <0.1         |
| <b>Total ineligible</b>                |                | <b>1,521</b>   | <b>1.3</b>   |                | <b>1,252</b>   | <b>1.1</b>   |                | <b>1,144</b>   | <b>1.0</b>   |                | <b>794</b>     | <b>0.7</b>   |
| <b>Total eligible</b>                  |                | <b>113,181</b> | <b>100.0</b> |                | <b>113,564</b> | <b>100.0</b> |                | <b>114,920</b> | <b>100.0</b> |                | <b>114,703</b> | <b>100.0</b> |
| Aged 100+                              | 6              | 6              | <0.1         | 8              | 8              | <0.1         | 11             | 11             | <0.1         | 12             | 11             | <0.1         |
| Vital status unknown                   | 152            | 82             | <0.1         | 144            | 97             | <0.1         | 205            | 178            | 0.2          | 138            | 106            | <0.1         |
| Sex not known                          | 0              | 0              | 0.0          | 0              | 0              | 0.0          | 0              | 0              | 0.0          | 0              | 0              | 0.0          |
| Sex-site error                         | 0              | 0              | 0.0          | 0              | 0              | 0.0          | 0              | 0              | 0.0          | 0              | 0              | 0.0          |
| Invalid dates                          | 18             | 14             | <0.1         | 37             | 33             | <0.1         | 14             | 13             | <0.1         | 7              | 6              | <0.1         |
| Death certificate only                 | 7,626          | 7,585          | 6.7          | 7,108          | 7,088          | 6.2          | 6,080          | 6,065          | 5.3          | 4,671          | 4,659          | 4.1          |
| Autopsy only                           | 391            | 386            | 0.3          | 328            | 320            | 0.3          | 248            | 246            | 0.2          | 243            | 240            | 0.2          |
| Synchronous tumours                    | 259            | 238            | 0.2          | 260            | 236            | 0.2          | 491            | 445            | 0.4          | 263            | 206            | 0.2          |
| Multiple primary same site             | 63             | 12             | <0.1         | 100            | 41             | <0.1         | 162            | 88             | <0.1         | 196            | 116            | 0.1          |
| <b>Total exclusions</b>                |                | <b>8,323</b>   | <b>7.4</b>   |                | <b>7,823</b>   | <b>6.9</b>   |                | <b>7,046</b>   | <b>6.1</b>   |                | <b>5,344</b>   | <b>4.7</b>   |
| <b>Patients available for analyses</b> |                | <b>104,858</b> | <b>92.6</b>  |                | <b>105,741</b> | <b>93.1</b>  |                | <b>107,874</b> | <b>93.9</b>  |                | <b>109,359</b> | <b>95.3</b>  |
|                                        |                |                |              |                |                |              |                |                |              |                |                |              |
|                                        | 2003-04        |                |              | 2005-06        |                |              | 2007           |                |              | 1995-2007      |                |              |
|                                        | Records        | Patients       | %            |
| <b>Total registered</b>                | <b>118,510</b> | <b>118,367</b> | <b>100.0</b> | <b>123,098</b> | <b>122,925</b> | <b>100.0</b> | <b>62,327</b>  | <b>62,236</b>  | <b>100.0</b> | <b>765,470</b> | <b>764,607</b> | <b>100.0</b> |
| <b>Ineligible</b>                      |                |                |              |                |                |              |                |                |              |                |                |              |
| Incomplete data                        | 9              | 9              | <0.1         | 14             | 14             | <0.1         | 7              | 7              | <0.1         | 209            | 209            | <0.1         |
| Not resident in England or Wales       | 0              | 0              | 0.0          | 0              | 0              | 0.0          | 0              | 0              | 0.0          | 0              | 0              | 0.0          |
| In situ neoplasm                       | 20             | 20             | <0.1         | 16             | 16             | <0.1         | 7              | 6              | <0.1         | 123            | 113            | <0.1         |
| Benign or uncertain                    | 366            | 345            | 0.3          | 289            | 269            | 0.2          | 153            | 147            | 0.2          | 4,075          | 3,954          | 0.5          |
| Metastatic                             | 104            | 104            | <0.1         | 96             | 93             | <0.1         | 28             | 28             | <0.1         | 1,413          | 1,409          | 0.2          |
| Otherwise ineligible                   | 0              | 0              | 0.0          | 0              | 0              | 0.0          | 0              | 0              | 0.0          | 0              | 0              | 0.0          |
| Lymphoma                               | 18             | 17             | <0.1         | 19             | 18             | <0.1         | 9              | 8              | <0.1         | 116            | 113            | <0.1         |
| Leukaemia or myeloma                   | 1              | 1              | <0.1         | 1              | 1              | <0.1         | 1              | 1              | <0.1         | 17             | 17             | <0.1         |
| <b>Total ineligible</b>                |                | <b>496</b>     | <b>0.4</b>   |                | <b>411</b>     | <b>0.3</b>   |                | <b>197</b>     | <b>0.3</b>   |                | <b>5,815</b>   | <b>0.8</b>   |
| <b>Total eligible</b>                  |                | <b>117,871</b> | <b>100.0</b> |                | <b>122,514</b> | <b>100.0</b> |                | <b>62,039</b>  | <b>100.0</b> |                | <b>758,792</b> | <b>100.0</b> |
| Aged 100+                              | 14             | 14             | <0.1         | 25             | 25             | <0.1         | 7              | 5              | <0.1         | 83             | 80             | <0.1         |
| Vital status unknown                   | 102            | 94             | <0.1         | 86             | 72             | <0.1         | 23             | 16             | <0.1         | 850            | 645            | <0.1         |
| Sex not known                          | 0              | 0              | 0.0          | 1              | 0              | 0.0          | 0              | 0              | 0.0          | 1              | 0              | 0.0          |
| Sex-site error                         | 0              | 0              | 0.0          | 0              | 0              | 0.0          | 0              | 0              | 0.0          | 0              | 0              | 0.0          |
| Invalid dates                          | 15             | 14             | <0.1         | 13             | 8              | <0.1         | 31             | 28             | <0.1         | 135            | 116            | <0.1         |
| Death certificate only                 | 5,280          | 5,264          | 4.5          | 5,091          | 5,063          | 4.1          | 2,844          | 2,837          | 4.6          | 38,700         | 38,561         | 5.1          |
| Autopsy only                           | 146            | 145            | 0.1          | 167            | 166            | 0.1          | 113            | 113            | 0.2          | 1,636          | 1,616          | 0.2          |
| Synchronous tumours                    | 234            | 190            | 0.2          | 281            | 221            | 0.2          | 147            | 108            | 0.2          | 1,935          | 1,644          | 0.2          |
| Multiple primary same site             | 262            | 164            | 0.1          | 343            | 225            | 0.2          | 218            | 154            | 0.2          | 1,344          | 800            | 0.1          |
| <b>Total exclusions</b>                |                | <b>5,885</b>   | <b>5.0</b>   |                | <b>5,780</b>   | <b>4.7</b>   |                | <b>3,261</b>   | <b>5.3</b>   |                | <b>43,462</b>  | <b>5.7</b>   |
| <b>Patients available for analyses</b> |                | <b>111,986</b> | <b>95.0</b>  |                | <b>116,734</b> | <b>95.3</b>  |                | <b>58,778</b>  | <b>94.7</b>  |                | <b>715,330</b> | <b>94.3</b>  |



**Table 3: Ineligible and excluded records, and no. (%) of eligible patients included in analyses, by calendar period of diagnosis (1995-2007), all 12 jurisdictions combined: breast cancer (women)**

|                                        | 1995-96 |                |              | 1997-98 |                |              | 1999-2000 |                |              | 2001-02 |                |              |
|----------------------------------------|---------|----------------|--------------|---------|----------------|--------------|-----------|----------------|--------------|---------|----------------|--------------|
| Total registered                       | 122,919 | 122,393        | 100.0        | 132,491 | 131,604        | 100.0        | 139,188   | 138,172        | 100.0        | 143,751 | 142,614        | 100.0        |
| Ineligible                             | Records | Patients       | %            | Records | Patients       | %            | Records   | Patients       | %            | Records | Patients       | %            |
| Incomplete data                        | 105     | 105            | <0.1         | 69      | 68             | <0.1         | 37        | 36             | <0.1         | 14      | 14             | <0.1         |
| Not resident in England or Wales       | 0       | 0              | 0.0          | 0       | 0              | 0.0          | 0         | 0              | 0.0          | 0       | 0              | 0.0          |
| In situ neoplasm                       | 5,218   | 5,027          | 4.1          | 6,547   | 6,307          | 4.8          | 7,604     | 7,349          | 5.3          | 8,458   | 8,188          | 5.7          |
| Benign or uncertain                    | 358     | 342            | 0.3          | 405     | 389            | 0.3          | 297       | 280            | 0.2          | 313     | 279            | 0.2          |
| Metastatic                             | 21      | 21             | <0.1         | 21      | 20             | <0.1         | 30        | 30             | <0.1         | 21      | 21             | <0.1         |
| Otherwise ineligible                   | 0       | 0              | 0.0          | 0       | 0              | 0.0          | 0         | 0              | 0.0          | 0       | 0              | 0.0          |
| Lymphoma                               | 15      | 15             | <0.1         | 17      | 17             | <0.1         | 18        | 18             | <0.1         | 13      | 13             | <0.1         |
| Leukaemia or myeloma                   | 1       | 1              | <0.1         | 0       | 0              | 0.0          | 0         | 0              | 0.0          | 0       | 0              | 0.0          |
| <b>Total ineligible</b>                |         | <b>5,511</b>   | <b>4.5</b>   |         | <b>6,801</b>   | <b>5.2</b>   |           | <b>7,713</b>   | <b>5.6</b>   |         | <b>8,515</b>   | <b>6.0</b>   |
| <b>Total eligible</b>                  |         | <b>116,882</b> | <b>100.0</b> |         | <b>124,803</b> | <b>100.0</b> |           | <b>130,459</b> | <b>100.0</b> |         | <b>134,099</b> | <b>100.0</b> |
| Aged 100+                              | 65      | 65             | <0.1         | 56      | 56             | <0.1         | 82        | 82             | <0.1         | 77      | 76             | <0.1         |
| Vital status unknown                   | 285     | 190            | 0.2          | 262     | 201            | 0.2          | 303       | 266            | 0.2          | 300     | 283            | 0.2          |
| Sex not known                          | 0       | 0              | 0.0          | 0       | 0              | 0.0          | 0         | 0              | 0.0          | 0       | 0              | 0.0          |
| Sex-site error                         | 0       | 0              | 0.0          | 0       | 0              | 0.0          | 0         | 0              | 0.0          | 0       | 0              | 0.0          |
| Invalid dates                          | 4       | 4              | <0.1         | 9       | 7              | <0.1         | 6         | 6              | <0.1         | 35      | 34             | <0.1         |
| Death certificate only                 | 2,673   | 2,627          | 2.2          | 2,863   | 2,817          | 2.3          | 2,299     | 2,256          | 1.7          | 1,716   | 1,684          | 1.3          |
| Autopsy only                           | 20      | 20             | <0.1         | 20      | 19             | <0.1         | 15        | 15             | <0.1         | 9       | 9              | <0.1         |
| Synchronous tumours                    | 673     | 539            | 0.5          | 920     | 577            | 0.5          | 1,489     | 1,057          | 0.8          | 1,140   | 697            | 0.5          |
| Multiple primary same site             | 324     | 55             | <0.1         | 878     | 414            | 0.3          | 1,358     | 834            | 0.6          | 1,761   | 1,153          | 0.9          |
| <b>Total exclusions</b>                |         | <b>3,500</b>   | <b>3.0</b>   |         | <b>4,091</b>   | <b>3.3</b>   |           | <b>4,516</b>   | <b>3.5</b>   |         | <b>3,936</b>   | <b>2.9</b>   |
| <b>Patients available for analyses</b> |         | <b>113,382</b> | <b>97.0</b>  |         | <b>120,712</b> | <b>96.7</b>  |           | <b>125,943</b> | <b>96.5</b>  |         | <b>130,163</b> | <b>97.1</b>  |

  

|                                        | 2003-04 |                |              | 2005-06 |                |              | 2007    |               |              | 1995-2007 |                |              |
|----------------------------------------|---------|----------------|--------------|---------|----------------|--------------|---------|---------------|--------------|-----------|----------------|--------------|
| Total registered                       | 150,970 | 149,318        | 100.0        | 156,212 | 154,153        | 100.0        | 78,762  | 77,925        | 100.0        | 924,293   | 916,179        | 100.0        |
| Ineligible                             | Records | Patients       | %            | Records | Patients       | %            | Records | Patients      | %            | Records   | Patients       | %            |
| Incomplete data                        | 17      | 17             | <0.1         | 14      | 14             | <0.1         | 5       | 5             | <0.1         | 261       | 259            | <0.1         |
| Not resident in England or Wales       | 0       | 0              | 0.0          | 0       | 0              | 0.0          | 0       | 0             | 0.0          | 0         | 0              | 0.0          |
| In situ neoplasm                       | 9,866   | 9,337          | 6.3          | 11,532  | 10,768         | 7.0          | 5,988   | 5,729         | 7.4          | 55,213    | 52,705         | 5.8          |
| Benign or uncertain                    | 301     | 261            | 0.2          | 349     | 311            | 0.2          | 202     | 187           | 0.2          | 2,225     | 2,049          | 0.2          |
| Metastatic                             | 10      | 10             | <0.1         | 9       | 9              | <0.1         | 2       | 1             | <0.1         | 114       | 112            | <0.1         |
| Otherwise ineligible                   | 0       | 0              | 0.0          | 0       | 0              | 0.0          | 0       | 0             | 0.0          | 0         | 0              | 0.0          |
| Lymphoma                               | 12      | 11             | <0.1         | 6       | 6              | <0.1         | 3       | 2             | <0.1         | 84        | 82             | <0.1         |
| Leukaemia or myeloma                   | 0       | 0              | 0.0          | 0       | 0              | 0.0          | 0       | 0             | 0.0          | 1         | 1              | <0.1         |
| <b>Total ineligible</b>                |         | <b>9,636</b>   | <b>6.5</b>   |         | <b>11,108</b>  | <b>7.2</b>   |         | <b>5,924</b>  | <b>7.6</b>   |           | <b>55,208</b>  | <b>6.0</b>   |
| <b>Total eligible</b>                  |         | <b>139,682</b> | <b>100.0</b> |         | <b>143,045</b> | <b>100.0</b> |         | <b>72,001</b> | <b>100.0</b> |           | <b>860,971</b> | <b>100.0</b> |
| Aged 100+                              | 77      | 77             | <0.1         | 92      | 91             | <0.1         | 39      | 39            | <0.1         | 488       | 486            | <0.1         |
| Vital status unknown                   | 265     | 247            | 0.2          | 313     | 303            | 0.2          | 81      | 76            | 0.1          | 1,809     | 1,566          | 0.2          |
| Sex not known                          | 0       | 0              | 0.0          | 0       | 0              | 0.0          | 0       | 0             | 0.0          | 0         | 0              | 0.0          |
| Sex-site error                         | 0       | 0              | 0.0          | 0       | 0              | 0.0          | 0       | 0             | 0.0          | 0         | 0              | 0.0          |
| Invalid dates                          | 62      | 58             | <0.1         | 20      | 18             | <0.1         | 23      | 22            | <0.1         | 159       | 149            | <0.1         |
| Death certificate only                 | 1,523   | 1,485          | 1.1          | 1,188   | 1,151          | 0.8          | 591     | 572           | 0.8          | 12,853    | 12,592         | 1.5          |
| Autopsy only                           | 10      | 10             | <0.1         | 11      | 11             | <0.1         | 6       | 6             | <0.1         | 91        | 90             | <0.1         |
| Synchronous tumours                    | 1,493   | 932            | 0.7          | 1,544   | 860            | 0.6          | 724     | 412           | 0.6          | 7,983     | 5,074          | 0.6          |
| Multiple primary same site             | 2,488   | 1,660          | 1.2          | 3,201   | 2,278          | 1.6          | 1,682   | 1,270         | 1.8          | 11,692    | 7,664          | 0.9          |
| <b>Total exclusions</b>                |         | <b>4,469</b>   | <b>3.2</b>   |         | <b>4,712</b>   | <b>3.3</b>   |         | <b>2,397</b>  | <b>3.3</b>   |           | <b>27,621</b>  | <b>3.2</b>   |
| <b>Patients available for analyses</b> |         | <b>135,213</b> | <b>96.8</b>  |         | <b>138,333</b> | <b>96.7</b>  |         | <b>69,604</b> | <b>96.7</b>  |           | <b>833,350</b> | <b>96.8</b>  |

**Table 4: Ineligible and excluded records, and no. (%) of eligible patients included in analyses, by calendar period of diagnosis (1995-2007), all 12 jurisdictions (except Swedish regions) combined: ovarian cancer**

|                                        | 1995-96       |               |              | 1997-98       |               |              | 1999-2000     |               |              | 2001-02        |                |              |
|----------------------------------------|---------------|---------------|--------------|---------------|---------------|--------------|---------------|---------------|--------------|----------------|----------------|--------------|
|                                        | Records       | Patients      | %            | Records       | Patients      | %            | Records       | Patients      | %            | Records        | Patients       | %            |
| <b>Total registered</b>                | <b>20,194</b> | <b>20,134</b> | <b>100.0</b> | <b>21,193</b> | <b>21,150</b> | <b>100.0</b> | <b>21,172</b> | <b>21,124</b> | <b>100.0</b> | <b>21,778</b>  | <b>21,713</b>  | <b>100.0</b> |
| <b>Ineligible</b>                      |               |               |              |               |               |              |               |               |              |                |                |              |
| Incomplete data                        | 30            | 30            | 0.1          | 8             | 8             | <0.1         | 5             | 5             | <0.1         | 25             | 25             | 0.1          |
| Not resident in England or Wales       | 0             | 0             | 0.0          | 0             | 0             | 0.0          | 0             | 0             | 0.0          | 0              | 0              | 0.0          |
| In situ neoplasm                       | 197           | 195           | 1.0          | 80            | 79            | 0.4          | 29            | 28            | 0.1          | 35             | 35             | 0.2          |
| Benign or uncertain                    | 1,586         | 1,562         | 7.8          | 1,729         | 1,713         | 8.1          | 1,658         | 1,633         | 7.7          | 1,626          | 1,569          | 7.2          |
| Metastatic                             | 110           | 110           | 0.5          | 48            | 48            | 0.2          | 91            | 91            | 0.4          | 60             | 60             | 0.3          |
| Otherwise ineligible                   | 0             | 0             | 0.0          | 0             | 0             | 0.0          | 0             | 0             | 0.0          | 0              | 0              | 0.0          |
| Lymphoma                               | 1             | 1             | <0.1         | 2             | 2             | <0.1         | 0             | 0             | 0.0          | 0              | 0              | 0.0          |
| Leukaemia or myeloma                   | 0             | 0             | 0.0          | 0             | 0             | 0.0          | 0             | 0             | 0.0          | 0              | 0              | 0.0          |
| <b>Total ineligible</b>                |               | <b>1,898</b>  | <b>9.4</b>   |               | <b>1,850</b>  | <b>8.7</b>   |               | <b>1,757</b>  | <b>8.3</b>   |                | <b>1,689</b>   | <b>7.8</b>   |
| <b>Total eligible</b>                  |               | <b>18,236</b> | <b>100.0</b> |               | <b>19,300</b> | <b>100.0</b> |               | <b>19,367</b> | <b>100.0</b> |                | <b>20,024</b>  | <b>100.0</b> |
| Aged 100+                              | 4             | 4             | <0.1         | 0             | 0             | 0.0          | 7             | 7             | <0.1         | 5              | 5              | <0.1         |
| Vital status unknown                   | 45            | 18            | <0.1         | 29            | 21            | 0.1          | 33            | 28            | 0.1          | 32             | 28             | 0.1          |
| Sex not known                          | 0             | 0             | 0.0          | 1             | 1             | <0.1         | 0             | 0             | 0.0          | 0              | 0              | 0.0          |
| Sex-site error                         | 0             | 0             | 0.0          | 0             | 0             | 0.0          | 0             | 0             | 0.0          | 0              | 0              | 0.0          |
| Invalid dates                          | 3             | 2             | <0.1         | 3             | 3             | <0.1         | 0             | 0             | 0.0          | 3              | 3              | <0.1         |
| Death certificate only                 | 790           | 784           | 4.3          | 797           | 790           | 4.1          | 770           | 764           | 3.9          | 592            | 588            | 2.9          |
| Autopsy only                           | 29            | 29            | 0.2          | 16            | 16            | <0.1         | 13            | 13            | <0.1         | 12             | 12             | <0.1         |
| Synchronous tumours                    | 45            | 23            | 0.1          | 40            | 25            | 0.1          | 59            | 45            | 0.2          | 48             | 29             | 0.1          |
| Multiple primary same site             | 34            | 9             | <0.1         | 34            | 16            | <0.1         | 28            | 12            | <0.1         | 35             | 15             | <0.1         |
| <b>Total exclusions</b>                |               | <b>869</b>    | <b>4.8</b>   |               | <b>872</b>    | <b>4.5</b>   |               | <b>869</b>    | <b>4.5</b>   |                | <b>680</b>     | <b>3.4</b>   |
| <b>Patients available for analyses</b> |               | <b>17,367</b> | <b>95.2</b>  |               | <b>18,428</b> | <b>95.5</b>  |               | <b>18,498</b> | <b>95.5</b>  |                | <b>19,344</b>  | <b>96.6</b>  |
|                                        |               |               |              |               |               |              |               |               |              |                |                |              |
|                                        | 2003-04       |               |              | 2005-06       |               |              | 2007          |               |              | 1995-2007      |                |              |
|                                        | Records       | Patients      | %            | Records       | Patients      | %            | Records       | Patients      | %            | Records        | Patients       | %            |
| <b>Total registered</b>                | <b>21,245</b> | <b>21,203</b> | <b>100.0</b> | <b>21,295</b> | <b>21,250</b> | <b>100.0</b> | <b>10,648</b> | <b>10,625</b> | <b>100.0</b> | <b>137,525</b> | <b>137,199</b> | <b>100.0</b> |
| <b>Ineligible</b>                      |               |               |              |               |               |              |               |               |              |                |                |              |
| Incomplete data                        | 9             | 9             | <0.1         | 24            | 24            | 0.1          | 3             | 3             | <0.1         | 104            | 104            | <0.1         |
| Not resident in England or Wales       | 0             | 0             | 0.0          | 0             | 0             | 0.0          | 0             | 0             | 0.0          | 0              | 0              | 0.0          |
| In situ neoplasm                       | 28            | 25            | 0.1          | 29            | 26            | 0.1          | 46            | 46            | 0.4          | 444            | 434            | 0.3          |
| Benign or uncertain                    | 1,529         | 1,501         | 7.1          | 1,593         | 1,577         | 7.4          | 868           | 854           | 8.0          | 10,589         | 10,409         | 7.6          |
| Metastatic                             | 29            | 29            | 0.1          | 19            | 19            | <0.1         | 6             | 6             | <0.1         | 363            | 363            | 0.3          |
| Otherwise ineligible                   | 0             | 0             | 0.0          | 0             | 0             | 0.0          | 0             | 0             | 0.0          | 0              | 0              | 0.0          |
| Lymphoma                               | 4             | 4             | <0.1         | 1             | 1             | <0.1         | 0             | 0             | 0.0          | 8              | 8              | <0.1         |
| Leukaemia or myeloma                   | 0             | 0             | 0.0          | 0             | 0             | 0.0          | 0             | 0             | 0.0          | 0              | 0              | 0.0          |
| <b>Total ineligible</b>                |               | <b>1,568</b>  | <b>7.4</b>   |               | <b>1,647</b>  | <b>7.8</b>   |               | <b>909</b>    | <b>8.6</b>   |                | <b>11,318</b>  | <b>8.2</b>   |
| <b>Total eligible</b>                  |               | <b>19,635</b> | <b>100.0</b> |               | <b>19,603</b> | <b>100.0</b> |               | <b>9,716</b>  | <b>100.0</b> |                | <b>125,881</b> | <b>100.0</b> |
| Aged 100+                              | 8             | 8             | <0.1         | 5             | 5             | <0.1         | 5             | 5             | <0.1         | 34             | 34             | <0.1         |
| Vital status unknown                   | 26            | 26            | 0.1          | 54            | 32            | 0.2          | 11            | 9             | <0.1         | 230            | 162            | 0.1          |
| Sex not known                          | 0             | 0             | 0.0          | 0             | 0             | 0.0          | 0             | 0             | 0.0          | 1              | 1              | <0.1         |
| Sex-site error                         | 0             | 0             | 0.0          | 0             | 0             | 0.0          | 0             | 0             | 0.0          | 0              | 0              | 0.0          |
| Invalid dates                          | 3             | 3             | <0.1         | 2             | 2             | <0.1         | 9             | 8             | <0.1         | 23             | 21             | <0.1         |
| Death certificate only                 | 523           | 519           | 2.6          | 474           | 470           | 2.4          | 268           | 266           | 2.7          | 4,214          | 4,181          | 3.3          |
| Autopsy only                           | 11            | 11            | <0.1         | 18            | 18            | <0.1         | 5             | 5             | <0.1         | 104            | 104            | <0.1         |
| Synchronous tumours                    | 53            | 37            | 0.2          | 50            | 34            | 0.2          | 20            | 14            | 0.1          | 315            | 207            | 0.2          |
| Multiple primary same site             | 41            | 28            | 0.1          | 36            | 21            | 0.1          | 19            | 11            | 0.1          | 227            | 112            | <0.1         |
| <b>Total exclusions</b>                |               | <b>632</b>    | <b>3.2</b>   |               | <b>582</b>    | <b>3.0</b>   |               | <b>318</b>    | <b>3.3</b>   |                | <b>4,822</b>   | <b>3.8</b>   |
| <b>Patients available for analyses</b> |               | <b>19,003</b> | <b>96.8</b>  |               | <b>19,021</b> | <b>97.0</b>  |               | <b>9,398</b>  | <b>96.7</b>  |                | <b>121,059</b> | <b>96.2</b>  |

**Table 5: Number of patients included in the analyses, both overall and 1-year survivors, by calendar period, age, sex, country and jurisdiction: colorectal cancer**

|                       |              | 1995-99       |                  |               |                  |               |                  | 2000-02       |                  |               |                  |               |                  | 2005-07 <sup>a</sup> |                  |               |                  |               |                  |
|-----------------------|--------------|---------------|------------------|---------------|------------------|---------------|------------------|---------------|------------------|---------------|------------------|---------------|------------------|----------------------|------------------|---------------|------------------|---------------|------------------|
|                       |              | Men           |                  | Women         |                  | Persons       |                  | Men           |                  | Women         |                  | Persons       |                  | Men                  |                  | Women         |                  | Persons       |                  |
|                       |              | All           | 1-year survivors | All                  | 1-year survivors | All           | 1-year survivors | All           | 1-year survivors |
| Australian registries | 15-44        | 597           | 517              | 611           | 532              | 1,208         | 1,049            | 379           | 348              | 385           | 345              | 764           | 693              | 662                  | 484              | 716           | 530              | 1,378         | 1,014            |
|                       | 45-54        | 1,720         | 1,469            | 1,349         | 1,155            | 3,069         | 2,624            | 1,118         | 980              | 904           | 793              | 2,022         | 1,773            | 1,774                | 1,306            | 1,547         | 1,131            | 3,321         | 2,437            |
|                       | 55-64        | 3,982         | 3,275            | 2,568         | 2,151            | 6,550         | 5,426            | 2,529         | 2,188            | 1,728         | 1,500            | 4,257         | 3,688            | 4,551                | 3,345            | 3,011         | 2,160            | 7,562         | 5,505            |
|                       | 65-74        | 6,346         | 4,932            | 4,415         | 3,560            | 10,761        | 8,492            | 3,953         | 3,249            | 2,709         | 2,191            | 6,662         | 5,440            | 6,592                | 4,624            | 4,452         | 3,112            | 11,044        | 7,736            |
|                       | 75-99        | 5,202         | 3,460            | 5,831         | 3,875            | 11,033        | 7,335            | 3,922         | 2,671            | 4,038         | 2,739            | 7,960         | 5,410            | 6,896                | 4,340            | 7,000         | 4,488            | 13,896        | 8,828            |
|                       | <b>Total</b> | <b>17,847</b> | <b>13,653</b>    | <b>14,774</b> | <b>11,273</b>    | <b>32,621</b> | <b>24,926</b>    | <b>11,901</b> | <b>9,436</b>     | <b>9,764</b>  | <b>7,568</b>     | <b>21,665</b> | <b>17,004</b>    | <b>20,475</b>        | <b>14,099</b>    | <b>16,726</b> | <b>11,421</b>    | <b>37,201</b> | <b>25,520</b>    |
| New South Wales       | 15-44        | 322           | 280              | 330           | 290              | 652           | 570              | 217           | 202              | 188           | 170              | 405           | 372              | 371                  | 264              | 378           | 272              | 749           | 536              |
|                       | 45-54        | 1,022         | 868              | 779           | 653              | 1,801         | 1,521            | 603           | 528              | 516           | 457              | 1,119         | 985              | 1,027                | 751              | 850           | 626              | 1,877         | 1,377            |
|                       | 55-64        | 2,298         | 1,898            | 1,517         | 1,265            | 3,815         | 3,163            | 1,501         | 1,314            | 1,045         | 919              | 2,546         | 2,233            | 2,633                | 1,913            | 1,778         | 1,257            | 4,411         | 3,170            |
|                       | 65-74        | 3,561         | 2,799            | 2,416         | 1,960            | 5,977         | 4,759            | 2,209         | 1,826            | 1,520         | 1,232            | 3,729         | 3,058            | 3,773                | 2,636            | 2,536         | 1,776            | 6,309         | 4,412            |
|                       | 75-99        | 2,906         | 1,940            | 3,207         | 2,141            | 6,113         | 4,081            | 2,099         | 1,453            | 2,177         | 1,465            | 4,276         | 2,918            | 3,804                | 2,368            | 3,961         | 2,561            | 7,765         | 4,929            |
|                       | <b>Total</b> | <b>10,109</b> | <b>7,785</b>     | <b>8,249</b>  | <b>6,309</b>     | <b>18,358</b> | <b>14,094</b>    | <b>6,629</b>  | <b>5,323</b>     | <b>5,446</b>  | <b>4,243</b>     | <b>12,075</b> | <b>9,566</b>     | <b>11,608</b>        | <b>7,932</b>     | <b>9,503</b>  | <b>6,492</b>     | <b>21,111</b> | <b>14,424</b>    |
| Victoria              | 15-44        | 275           | 237              | 281           | 242              | 556           | 479              | 162           | 146              | 197           | 175              | 359           | 321              | 291                  | 220              | 338           | 258              | 629           | 478              |
|                       | 45-54        | 698           | 601              | 570           | 502              | 1,268         | 1,103            | 515           | 452              | 388           | 336              | 903           | 788              | 747                  | 555              | 697           | 505              | 1,444         | 1,060            |
|                       | 55-64        | 1,684         | 1,377            | 1,051         | 886              | 2,735         | 2,263            | 1,028         | 874              | 683           | 581              | 1,711         | 1,455            | 1,918                | 1,432            | 1,233         | 903              | 3,151         | 2,335            |
|                       | 65-74        | 2,785         | 2,133            | 1,999         | 1,600            | 4,784         | 3,733            | 1,744         | 1,423            | 1,189         | 959              | 2,933         | 2,382            | 2,819                | 1,988            | 1,916         | 1,336            | 4,735         | 3,324            |
|                       | 75-99        | 2,296         | 1,520            | 2,624         | 1,734            | 4,920         | 3,254            | 1,823         | 1,218            | 1,861         | 1,274            | 3,684         | 2,492            | 3,092                | 1,972            | 3,039         | 1,927            | 6,131         | 3,899            |
|                       | <b>Total</b> | <b>7,738</b>  | <b>5,868</b>     | <b>6,525</b>  | <b>4,964</b>     | <b>14,263</b> | <b>10,832</b>    | <b>5,272</b>  | <b>4,113</b>     | <b>4,318</b>  | <b>3,325</b>     | <b>9,590</b>  | <b>7,438</b>     | <b>8,867</b>         | <b>6,167</b>     | <b>7,223</b>  | <b>4,929</b>     | <b>16,090</b> | <b>11,096</b>    |
| Canadian registries   | 15-44        | 920           | 768              | 871           | 729              | 1,791         | 1,497            | 622           | 544              | 598           | 528              | 1,220         | 1,072            | 1,053                | 786              | 1,009         | 737              | 2,062         | 1,523            |
|                       | 45-54        | 2,368         | 1,993            | 1,942         | 1,637            | 4,310         | 3,630            | 1,745         | 1,506            | 1,422         | 1,249            | 3,167         | 2,755            | 3,289                | 2,358            | 2,536         | 1,855            | 5,825         | 4,213            |
|                       | 55-64        | 5,336         | 4,355            | 3,553         | 2,957            | 8,889         | 7,312            | 3,697         | 3,128            | 2,497         | 2,145            | 6,194         | 5,273            | 6,926                | 4,913            | 4,490         | 3,221            | 11,416        | 8,134            |
|                       | 65-74        | 8,912         | 6,912            | 6,323         | 4,978            | 15,235        | 11,890           | 5,832         | 4,656            | 3,971         | 3,253            | 9,803         | 7,909            | 9,504                | 6,726            | 6,512         | 4,601            | 16,016        | 11,327           |
|                       | 75-99        | 8,144         | 5,417            | 9,463         | 6,256            | 17,607        | 11,673           | 5,801         | 4,001            | 6,564         | 4,399            | 12,365        | 8,400            | 9,878                | 6,149            | 10,887        | 6,850            | 20,765        | 12,999           |
|                       | <b>Total</b> | <b>25,680</b> | <b>19,445</b>    | <b>22,152</b> | <b>16,557</b>    | <b>47,832</b> | <b>36,002</b>    | <b>17,697</b> | <b>13,835</b>    | <b>15,052</b> | <b>11,574</b>    | <b>32,749</b> | <b>25,409</b>    | <b>30,650</b>        | <b>20,932</b>    | <b>25,434</b> | <b>17,264</b>    | <b>56,084</b> | <b>38,196</b>    |
| Alberta               | 15-44        | 120           | 99               | 113           | 90               | 233           | 189              | 93            | 74               | 78            | 72               | 171           | 146              | 168                  | 126              | 132           | 89               | 300           | 215              |
|                       | 45-54        | 304           | 251              | 224           | 183              | 528           | 434              | 227           | 189              | 197           | 166              | 424           | 355              | 525                  | 369              | 378           | 288              | 903           | 657              |
|                       | 55-64        | 689           | 549              | 403           | 324              | 1,092         | 873              | 480           | 408              | 333           | 281              | 813           | 689              | 880                  | 624              | 561           | 392              | 1,441         | 1,016            |
|                       | 65-74        | 1,052         | 811              | 641           | 507              | 1,693         | 1,318            | 751           | 594              | 454           | 366              | 1,205         | 960              | 1,162                | 802              | 817           | 542              | 1,979         | 1,344            |
|                       | 75-99        | 1,036         | 653              | 1,079         | 701              | 2,115         | 1,354            | 694           | 455              | 720           | 468              | 1,414         | 923              | 1,289                | 797              | 1,280         | 803              | 2,569         | 1,600            |
|                       | <b>Total</b> | <b>3,201</b>  | <b>2,363</b>     | <b>2,460</b>  | <b>1,805</b>     | <b>5,661</b>  | <b>4,168</b>     | <b>2,245</b>  | <b>1,720</b>     | <b>1,782</b>  | <b>1,353</b>     | <b>4,027</b>  | <b>3,073</b>     | <b>4,024</b>         | <b>2,718</b>     | <b>3,168</b>  | <b>2,114</b>     | <b>7,192</b>  | <b>4,832</b>     |
| British Columbia      | 15-44        | 163           | 137              | 161           | 140              | 324           | 277              | 104           | 94               | 131           | 116              | 235           | 210              | 178                  | 135              | 179           | 140              | 357           | 275              |
|                       | 45-54        | 444           | 372              | 359           | 299              | 803           | 671              | 336           | 291              | 275           | 237              | 611           | 528              | 586                  | 424              | 521           | 386              | 1,107         | 810              |
|                       | 55-64        | 1,015         | 837              | 687           | 582              | 1,702         | 1,419            | 693           | 590              | 491           | 421              | 1,184         | 1,011            | 1,358                | 956              | 894           | 656              | 2,252         | 1,612            |
|                       | 65-74        | 1,824         | 1,453            | 1,235         | 1,000            | 3,059         | 2,453            | 1,156         | 918              | 779           | 647              | 1,935         | 1,565            | 1,918                | 1,403            | 1,306         | 947              | 3,293         | 2,350            |
|                       | 75-99        | 1,874         | 1,273            | 1,974         | 1,355            | 3,848         | 2,628            | 1,349         | 957              | 1,445         | 998              | 2,794         | 1,955            | 2,241                | 1,437            | 2,272         | 1,424            | 4,513         | 2,861            |
|                       | <b>Total</b> | <b>5,320</b>  | <b>4,072</b>     | <b>4,416</b>  | <b>3,376</b>     | <b>9,736</b>  | <b>7,448</b>     | <b>3,638</b>  | <b>2,850</b>     | <b>3,121</b>  | <b>2,419</b>     | <b>6,759</b>  | <b>5,269</b>     | <b>6,350</b>         | <b>4,355</b>     | <b>5,172</b>  | <b>3,553</b>     | <b>11,522</b> | <b>7,908</b>     |
| Manitoba              | 15-44        | 71            | 63               | 44            | 36               | 115           | 99               | 44            | 35               | 36            | 30               | 80            | 65               | 61                   | 46               | 69            | 50               | 130           | 96               |
|                       | 45-54        | 156           | 127              | 122           | 103              | 278           | 230              | 99            | 90               | 78            | 69               | 177           | 159              | 202                  | 139              | 144           | 99               | 346           | 238              |
|                       | 55-64        | 333           | 283              | 221           | 191              | 554           | 474              | 227           | 175              | 143           | 118              | 370           | 293              | 434                  | 295              | 257           | 178              | 691           | 473              |
|                       | 65-74        | 571           | 443              | 414           | 322              | 985           | 765              | 321           | 262              | 244           | 202              | 565           | 464              | 478                  | 332              | 348           | 238              | 826           | 570              |
|                       | 75-99        | 602           | 401              | 720           | 474              | 1,322         | 875              | 433           | 293              | 470           | 317              | 903           | 610              | 636                  | 397              | 749           | 466              | 1,385         | 863              |
|                       | <b>Total</b> | <b>1,733</b>  | <b>1,317</b>     | <b>1,521</b>  | <b>1,126</b>     | <b>3,254</b>  | <b>2,443</b>     | <b>1,124</b>  | <b>855</b>       | <b>971</b>    | <b>736</b>       | <b>2,095</b>  | <b>1,591</b>     | <b>1,811</b>         | <b>1,209</b>     | <b>1,567</b>  | <b>1,031</b>     | <b>3,378</b>  | <b>2,240</b>     |

**Table 5: Number of patients included in the analyses, both overall and 1-year survivors, by calendar period, age, sex, country and jurisdiction: colorectal cancer**

|                            |              | 1995-99 |                  |        |                  |         |                  | 2000-02 |                  |        |                  |         |                  | 2005-07 <sup>a</sup> |                  |        |                  |         |                  |
|----------------------------|--------------|---------|------------------|--------|------------------|---------|------------------|---------|------------------|--------|------------------|---------|------------------|----------------------|------------------|--------|------------------|---------|------------------|
|                            |              | Men     |                  | Women  |                  | Persons |                  | Men     |                  | Women  |                  | Persons |                  | Men                  |                  | Women  |                  | Persons |                  |
|                            |              | All     | 1-year survivors | All    | 1-year survivors | All     | 1-year survivors | All     | 1-year survivors | All    | 1-year survivors | All     | 1-year survivors | All                  | 1-year survivors | All    | 1-year survivors | All     | 1-year survivors |
| <b>Ontario</b>             | <b>15-44</b> | 566     | 469              | 553    | 463              | 1,119   | 932              | 381     | 341              | 353    | 310              | 734     | 651              | 646                  | 479              | 629    | 458              | 1,275   | 937              |
|                            | <b>45-54</b> | 1,464   | 1,243            | 1,237  | 1,052            | 2,701   | 2,295            | 1,083   | 936              | 872    | 777              | 1,955   | 1,713            | 1,976                | 1,426            | 1,493  | 1,082            | 3,469   | 2,508            |
|                            | <b>55-64</b> | 3,299   | 2,686            | 2,242  | 1,860            | 5,541   | 4,546            | 2,297   | 1,955            | 1,530  | 1,325            | 3,827   | 3,280            | 4,254                | 3,038            | 2,778  | 1,995            | 7,032   | 5,033            |
|                            | <b>65-74</b> | 5,465   | 4,205            | 4,033  | 3,149            | 9,498   | 7,354            | 3,604   | 2,882            | 2,494  | 2,038            | 6,098   | 4,920            | 5,877                | 4,189            | 4,041  | 2,874            | 9,918   | 7,063            |
|                            | <b>75-99</b> | 4,632   | 3,090            | 5,690  | 3,726            | 10,322  | 6,816            | 3,325   | 2,296            | 3,929  | 2,616            | 7,254   | 4,912            | 5,712                | 3,518            | 6,586  | 4,157            | 12,298  | 7,675            |
|                            | <b>Total</b> | 15,426  | 11,693           | 13,755 | 10,250           | 29,181  | 21,943           | 10,690  | 8,410            | 9,178  | 7,066            | 19,868  | 15,476           | 18,465               | 12,650           | 15,527 | 10,566           | 33,992  | 23,216           |
| <b>Denmark</b>             | <b>15-44</b> | 185     | 156              | 201    | 163              | 386     | 319              | 116     | 93               | 106    | 89               | 222     | 182              | 206                  | 145              | 200    | 137              | 406     | 282              |
|                            | <b>45-54</b> | 693     | 520              | 615    | 497              | 1,308   | 1,017            | 448     | 369              | 372    | 321              | 820     | 690              | 747                  | 505              | 649    | 489              | 1,396   | 994              |
|                            | <b>55-64</b> | 1,634   | 1,235            | 1,309  | 1,011            | 2,943   | 2,246            | 1,136   | 914              | 876    | 727              | 2,012   | 1,641            | 2,161                | 1,502            | 1,671  | 1,161            | 3,832   | 2,663            |
|                            | <b>65-74</b> | 2,571   | 1,740            | 2,347  | 1,679            | 4,918   | 3,419            | 1,725   | 1,225            | 1,372  | 967              | 3,097   | 2,192            | 3,127                | 2,087            | 2,319  | 1,566            | 5,446   | 3,653            |
|                            | <b>75-99</b> | 3,016   | 1,662            | 3,822  | 2,188            | 6,838   | 3,850            | 1,941   | 1,073            | 2,344  | 1,334            | 4,285   | 2,407            | 3,147                | 1,725            | 3,791  | 2,080            | 6,938   | 3,805            |
|                            | <b>Total</b> | 8,099   | 5,313            | 8,294  | 5,538            | 16,393  | 10,851           | 5,366   | 3,674            | 5,070  | 3,438            | 10,436  | 7,112            | 9,388                | 5,964            | 8,630  | 5,433            | 18,018  | 11,397           |
| <b>Norway</b>              | <b>15-44</b> | 158     | 125              | 211    | 182              | 369     | 307              | 115     | 97               | 123    | 108              | 238     | 205              | 216                  | 155              | 242    | 188              | 458     | 343              |
|                            | <b>45-54</b> | 540     | 440              | 564    | 480              | 1,104   | 920              | 333     | 265              | 355    | 305              | 688     | 570              | 598                  | 448              | 563    | 416              | 1,161   | 864              |
|                            | <b>55-64</b> | 1,201   | 970              | 1,064  | 906              | 2,265   | 1,876            | 860     | 715              | 748    | 640              | 1,608   | 1,355            | 1,596                | 1,141            | 1,337  | 957              | 2,933   | 2,098            |
|                            | <b>65-74</b> | 2,382   | 1,828            | 2,017  | 1,593            | 4,399   | 3,421            | 1,413   | 1,068            | 1,164  | 938              | 2,577   | 2,006            | 2,265                | 1,545            | 1,965  | 1,390            | 4,230   | 2,935            |
|                            | <b>75-99</b> | 2,840   | 1,808            | 3,726  | 2,401            | 6,566   | 4,209            | 1,988   | 1,215            | 2,419  | 1,567            | 4,407   | 2,782            | 3,150                | 1,982            | 3,828  | 2,344            | 6,978   | 4,326            |
|                            | <b>Total</b> | 7,121   | 5,171            | 7,582  | 5,562            | 14,703  | 10,733           | 4,709   | 3,360            | 4,809  | 3,558            | 9,518   | 6,918            | 7,825                | 5,271            | 7,935  | 5,295            | 15,760  | 10,566           |
| <b>Swedish regions</b>     | <b>15-44</b> | 82      | 70               | 72     | 63               | 154     | 133              | 74      | 63               | 66     | 61               | 140     | 124              | 129                  | 94               | 107    | 79               | 236     | 173              |
|                            | <b>45-54</b> | 276     | 236              | 238    | 210              | 514     | 446              | 217     | 186              | 168    | 143              | 385     | 329              | 311                  | 234              | 310    | 230              | 621     | 464              |
|                            | <b>55-64</b> | 623     | 514              | 494    | 402              | 1,117   | 916              | 567     | 495              | 429    | 363              | 996     | 858              | 1,024                | 741              | 849    | 621              | 1,873   | 1,362            |
|                            | <b>65-74</b> | 1,223   | 982              | 1,006  | 822              | 2,229   | 1,804            | 890     | 727              | 751    | 607              | 1,641   | 1,334            | 1,571                | 1,124            | 1,246  | 864              | 2,817   | 1,988            |
|                            | <b>75-99</b> | 1,595   | 1,102            | 1,773  | 1,265            | 3,368   | 2,367            | 1,250   | 871              | 1,374  | 987              | 2,624   | 1,858            | 2,111                | 1,384            | 2,292  | 1,506            | 4,403   | 2,890            |
|                            | <b>Total</b> | 3,799   | 2,904            | 3,583  | 2,762            | 7,382   | 5,666            | 2,998   | 2,342            | 2,788  | 2,161            | 5,786   | 4,503            | 5,146                | 3,577            | 4,804  | 3,300            | 9,950   | 6,877            |
| <b>UK-England</b>          | <b>15-44</b> | 1,580   | 1,265            | 1,462  | 1,184            | 3,042   | 2,449            | 1,028   | 842              | 968    | 833              | 1,996   | 1,675            | 1,891                | 1,317            | 1,809  | 1,243            | 3,700   | 2,560            |
|                            | <b>45-54</b> | 5,274   | 4,165            | 4,100  | 3,310            | 9,374   | 7,475            | 3,077   | 2,449            | 2,485  | 2,074            | 5,562   | 4,523            | 4,959                | 3,522            | 3,919  | 2,761            | 8,878   | 6,283            |
|                            | <b>55-64</b> | 13,577  | 10,273           | 8,667  | 6,737            | 22,244  | 17,010           | 8,475   | 6,695            | 5,358  | 4,321            | 13,833  | 11,016           | 14,627               | 10,085           | 9,512  | 6,410            | 24,139  | 16,495           |
|                            | <b>65-74</b> | 24,147  | 16,619           | 17,343 | 12,099           | 41,490  | 28,718           | 14,424  | 10,411           | 9,741  | 7,056            | 24,165  | 17,467           | 23,409               | 15,191           | 15,335 | 10,065           | 38,744  | 25,256           |
|                            | <b>75-99</b> | 24,570  | 13,204           | 29,556 | 15,138           | 54,126  | 28,342           | 16,929  | 9,382            | 18,353 | 9,822            | 35,282  | 19,204           | 27,105               | 14,836           | 27,481 | 14,610           | 54,586  | 29,446           |
|                            | <b>Total</b> | 69,148  | 45,526           | 61,128 | 38,468           | 130,276 | 83,994           | 43,933  | 29,779           | 36,905 | 24,106           | 80,838  | 53,885           | 71,991               | 44,951           | 58,056 | 35,089           | 130,047 | 80,040           |
| <b>UK-Northern Ireland</b> | <b>15-44</b> | 73      | 62               | 69     | 56               | 142     | 118              | 34      | 30               | 39     | 35               | 73      | 65               | 81                   | 43               | 59     | 33               | 140     | 76               |
|                            | <b>45-54</b> | 197     | 158              | 158    | 135              | 355     | 293              | 118     | 96               | 99     | 86               | 217     | 182              | 204                  | 144              | 177    | 122              | 381     | 266              |
|                            | <b>55-64</b> | 437     | 356              | 382    | 306              | 819     | 662              | 323     | 261              | 233    | 197              | 556     | 458              | 557                  | 378              | 345    | 225              | 902     | 603              |
|                            | <b>65-74</b> | 791     | 559              | 599    | 447              | 1,390   | 1,006            | 451     | 335              | 327    | 252              | 778     | 587              | 867                  | 555              | 577    | 375              | 1,444   | 930              |
|                            | <b>75-99</b> | 759     | 425              | 965    | 549              | 1,724   | 974              | 445     | 251              | 521    | 321              | 966     | 572              | 828                  | 448              | 845    | 440              | 1,673   | 888              |
|                            | <b>Total</b> | 2,257   | 1,560            | 2,173  | 1,493            | 4,430   | 3,053            | 1,371   | 973              | 1,219  | 891              | 2,590   | 1,864            | 2,537                | 1,568            | 2,003  | 1,195            | 4,540   | 2,763            |
| <b>UK-Wales</b>            | <b>15-44</b> | 122     | 89               | 108    | 92               | 230     | 181              | 68      | 58               | 60     | 53               | 128     | 111              | 122                  | 85               | 112    | 81               | 234     | 166              |
|                            | <b>45-54</b> | 386     | 310              | 276    | 218              | 662     | 528              | 230     | 186              | 170    | 139              | 400     | 325              | 330                  | 223              | 284    | 190              | 614     | 413              |
|                            | <b>55-64</b> | 1,006   | 750              | 603    | 455              | 1,609   | 1,205            | 598     | 457              | 356    | 279              | 954     | 736              | 1,075                | 701              | 690    | 457              | 1,765   | 1,158            |
|                            | <b>65-74</b> | 1,822   | 1,190            | 1,191  | 825              | 3,013   | 2,015            | 1,063   | 749              | 642    | 474              | 1,705   | 1,223            | 1,697                | 1,093            | 1,033  | 645              | 2,730   | 1,738            |
|                            | <b>75-99</b> | 1,759   | 911              | 2,109  | 1,028            | 3,868   | 1,939            | 1,168   | 659              | 1,216  | 634              | 2,384   | 1,293            | 1,965                | 1,086            | 1,748  | 905              | 3,713   | 1,991            |
|                            | <b>Total</b> | 5,095   | 3,250            | 4,287  | 2,618            | 9,382   | 5,868            | 3,127   | 2,109            | 2,444  | 1,579            | 5,571   | 3,688            | 5,189                | 3,188            | 3,867  | 2,278            | 9,056   | 5,466            |

<sup>a</sup> No. of patients included in the period analyses (see text and Figure 1) for 2005-07 are those who were diagnosed during 2005-07 and those who were diagnosed earlier but were alive on 1 January 2005

**Table 6: Number of patients included in the analyses, both overall and 1-year survivors, by calendar period, age, sex, country and jurisdiction: lung cancer**

|                       |              | 1995-99       |                |               |                |               |                | 2000-02       |                |               |                |               |                | 2005-07 <sup>a</sup> |                |               |                |               |                  |
|-----------------------|--------------|---------------|----------------|---------------|----------------|---------------|----------------|---------------|----------------|---------------|----------------|---------------|----------------|----------------------|----------------|---------------|----------------|---------------|------------------|
|                       |              | Men           |                | Women         |                | Persons       |                | Men           |                | Women         |                | Persons       |                | Men                  |                | Women         |                | Persons       |                  |
|                       |              | All           | 1-yr survivors | All                  | 1-yr survivors | All           | 1-yr survivors | All           | 1-year survivors |
| Australian registries | 15-44        | 232           | 119            | 218           | 127            | 450           | 246            | 136           | 68             | 141           | 84             | 277           | 152            | 213                  | 115            | 222           | 126            | 435           | 241              |
|                       | 45-54        | 1,080         | 425            | 714           | 345            | 1,794         | 770            | 601           | 269            | 461           | 251            | 1,062         | 520            | 872                  | 351            | 787           | 372            | 1,659         | 723              |
|                       | 55-64        | 3,076         | 1,242          | 1,408         | 649            | 4,484         | 1,891          | 1,854         | 756            | 1,033         | 514            | 2,887         | 1,270          | 2,610                | 1,144          | 1,780         | 867            | 4,390         | 2,011            |
|                       | 65-74        | 6,292         | 2,246          | 2,642         | 1,032          | 8,934         | 3,278          | 3,377         | 1,261          | 1,554         | 642            | 4,931         | 1,903          | 4,301                | 1,706          | 2,349         | 971            | 6,650         | 2,677            |
|                       | 75-99        | 4,777         | 1,189          | 2,388         | 636            | 7,165         | 1,825          | 3,271         | 947            | 1,878         | 531            | 5,149         | 1,478          | 4,998                | 1,425          | 2,969         | 881            | 7,967         | 2,306            |
|                       | <b>Total</b> | <b>15,457</b> | <b>5,221</b>   | <b>7,370</b>  | <b>2,789</b>   | <b>22,827</b> | <b>8,010</b>   | <b>9,239</b>  | <b>3,301</b>   | <b>5,067</b>  | <b>2,022</b>   | <b>14,306</b> | <b>5,323</b>   | <b>12,994</b>        | <b>4,741</b>   | <b>8,107</b>  | <b>3,217</b>   | <b>21,101</b> | <b>7,958</b>     |
| New South Wales       | 15-44        | 140           | 68             | 138           | 79             | 278           | 147            | 78            | 43             | 88            | 54             | 166           | 97             | 114                  | 58             | 127           | 68             | 241           | 126              |
|                       | 45-54        | 608           | 238            | 427           | 207            | 1,035         | 445            | 388           | 178            | 274           | 145            | 662           | 323            | 495                  | 198            | 457           | 224            | 952           | 422              |
|                       | 55-64        | 1,790         | 711            | 805           | 369            | 2,595         | 1,080          | 1,067         | 427            | 584           | 294            | 1,651         | 721            | 1,522                | 675            | 1,076         | 545            | 2,598         | 1,220            |
|                       | 65-74        | 3,633         | 1,274          | 1,524         | 612            | 5,157         | 1,886          | 1,973         | 746            | 872           | 354            | 2,845         | 1,100          | 2,484                | 997            | 1,352         | 551            | 3,836         | 1,548            |
|                       | 75-99        | 2,740         | 688            | 1,267         | 350            | 4,007         | 1,038          | 1,878         | 526            | 1,026         | 307            | 2,904         | 833            | 2,809                | 763            | 1,677         | 487            | 4,486         | 1,250            |
|                       | <b>Total</b> | <b>8,911</b>  | <b>2,979</b>   | <b>4,161</b>  | <b>1,617</b>   | <b>13,072</b> | <b>4,596</b>   | <b>5,384</b>  | <b>1,920</b>   | <b>2,844</b>  | <b>1,154</b>   | <b>8,228</b>  | <b>3,074</b>   | <b>7,424</b>         | <b>2,691</b>   | <b>4,689</b>  | <b>1,875</b>   | <b>12,113</b> | <b>4,566</b>     |
| Victoria              | 15-44        | 92            | 51             | 80            | 48             | 172           | 99             | 58            | 25             | 53            | 30             | 111           | 55             | 99                   | 57             | 95            | 58             | 194           | 115              |
|                       | 45-54        | 472           | 187            | 287           | 138            | 759           | 325            | 213           | 91             | 187           | 106            | 400           | 197            | 377                  | 153            | 330           | 148            | 707           | 301              |
|                       | 55-64        | 1,286         | 531            | 603           | 280            | 1,889         | 811            | 787           | 329            | 449           | 220            | 1,236         | 549            | 1,088                | 469            | 704           | 322            | 1,792         | 791              |
|                       | 65-74        | 2,659         | 972            | 1,118         | 420            | 3,777         | 1,392          | 1,404         | 515            | 682           | 288            | 2,086         | 803            | 1,817                | 709            | 997           | 420            | 2,814         | 1,129            |
|                       | 75-99        | 2,037         | 501            | 1,121         | 286            | 3,158         | 787            | 1,393         | 421            | 852           | 224            | 2,245         | 645            | 2,189                | 662            | 1,292         | 394            | 3,481         | 1,056            |
|                       | <b>Total</b> | <b>6,546</b>  | <b>2,242</b>   | <b>3,209</b>  | <b>1,172</b>   | <b>9,755</b>  | <b>3,414</b>   | <b>3,855</b>  | <b>1,381</b>   | <b>2,223</b>  | <b>868</b>     | <b>6,078</b>  | <b>2,249</b>   | <b>5,570</b>         | <b>2,050</b>   | <b>3,418</b>  | <b>1,342</b>   | <b>8,988</b>  | <b>3,392</b>     |
| Canadian registries   | 15-44        | 629           | 273            | 745           | 366            | 1,374         | 639            | 369           | 178            | 476           | 254            | 845           | 432            | 398                  | 205            | 544           | 329            | 942           | 534              |
|                       | 45-54        | 2,516         | 983            | 2,407         | 1,190          | 4,923         | 2,173          | 1,615         | 625            | 1,557         | 783            | 3,172         | 1,408          | 2,023                | 820            | 2,479         | 1,172          | 4,502         | 1,992            |
|                       | 55-64        | 6,872         | 2,691          | 4,958         | 2,318          | 11,830        | 5,009          | 4,008         | 1,523          | 3,268         | 1,601          | 7,276         | 3,124          | 5,671                | 2,257          | 5,269         | 2,399          | 10,940        | 4,656            |
|                       | 65-74        | 12,089        | 4,308          | 7,690         | 3,184          | 19,779        | 7,492          | 6,971         | 2,576          | 4,840         | 2,047          | 11,811        | 4,623          | 9,005                | 3,469          | 7,459         | 3,224          | 16,464        | 6,693            |
|                       | 75-99        | 9,081         | 2,477          | 6,329         | 1,991          | 15,410        | 4,468          | 6,061         | 1,692          | 4,991         | 1,547          | 11,052        | 3,239          | 8,982                | 2,588          | 7,848         | 2,700          | 16,830        | 5,288            |
|                       | <b>Total</b> | <b>31,187</b> | <b>10,732</b>  | <b>22,129</b> | <b>9,049</b>   | <b>53,316</b> | <b>19,781</b>  | <b>19,024</b> | <b>6,594</b>   | <b>15,132</b> | <b>6,232</b>   | <b>34,156</b> | <b>12,826</b>  | <b>26,079</b>        | <b>9,339</b>   | <b>23,599</b> | <b>9,824</b>   | <b>49,678</b> | <b>19,163</b>    |
| Alberta               | 15-44        | 73            | 21             | 86            | 43             | 159           | 64             | 41            | 57             | 20            | 98             | 38            | 43             | 20                   | 80             | 53            | 123            | 73            |                  |
|                       | 45-54        | 306           | 97             | 307           | 150            | 613           | 247            | 205           | 57             | 183           | 83             | 388           | 140            | 276                  | 108            | 335           | 136            | 611           | 244              |
|                       | 55-64        | 829           | 305            | 656           | 287            | 1,485         | 592            | 460           | 163            | 434           | 181            | 894           | 344            | 720                  | 272            | 784           | 360            | 1,504         | 632              |
|                       | 65-74        | 1,444         | 463            | 880           | 320            | 2,324         | 783            | 840           | 280            | 615           | 245            | 1,455         | 525            | 1,152                | 415            | 954           | 407            | 2,106         | 822              |
|                       | 75-99        | 1,189         | 283            | 743           | 233            | 1,932         | 516            | 795           | 199            | 634           | 190            | 1,429         | 389            | 1,198                | 333            | 994           | 343            | 2,192         | 676              |
|                       | <b>Total</b> | <b>3,841</b>  | <b>1,169</b>   | <b>2,672</b>  | <b>1,033</b>   | <b>6,513</b>  | <b>2,202</b>   | <b>2,341</b>  | <b>717</b>     | <b>1,923</b>  | <b>719</b>     | <b>4,264</b>  | <b>1,436</b>   | <b>3,389</b>         | <b>1,148</b>   | <b>3,147</b>  | <b>1,299</b>   | <b>6,536</b>  | <b>2,447</b>     |
| British Columbia      | 15-44        | 129           | 51             | 167           | 83             | 296           | 134            | 62            | 85             | 43            | 147            | 75            | 55             | 28                   | 86             | 49            | 141            | 77            |                  |
|                       | 45-54        | 487           | 175            | 530           | 241            | 1,017         | 416            | 285           | 97             | 353           | 171            | 638           | 268            | 380                  | 149            | 506           | 248            | 886           | 397              |
|                       | 55-64        | 1,343         | 508            | 968           | 427            | 2,311         | 935            | 712           | 248            | 652           | 289            | 1,364         | 537            | 1,110                | 385            | 1,081         | 486            | 2,191         | 871              |
|                       | 65-74        | 2,382         | 841            | 1,609         | 634            | 3,991         | 1,475          | 1,354         | 491            | 961           | 387            | 2,315         | 878            | 1,779                | 658            | 1,615         | 680            | 3,394         | 1,338            |
|                       | 75-99        | 2,002         | 493            | 1,541         | 433            | 3,543         | 926            | 1,328         | 334            | 1,185         | 364            | 2,513         | 698            | 1,950                | 544            | 1,759         | 579            | 3,709         | 1,123            |
|                       | <b>Total</b> | <b>6,343</b>  | <b>2,068</b>   | <b>4,815</b>  | <b>1,818</b>   | <b>11,158</b> | <b>3,886</b>   | <b>3,741</b>  | <b>1,202</b>   | <b>3,236</b>  | <b>1,254</b>   | <b>6,977</b>  | <b>2,456</b>   | <b>5,274</b>         | <b>1,764</b>   | <b>5,047</b>  | <b>2,042</b>   | <b>10,321</b> | <b>3,806</b>     |
| Manitoba              | 15-44        | 20            | 13             | 29            | 49             | 23            | 15             | 5             | 26             | 16            | 41             | 21            | 17             | 12                   | 27             | 18            | 44             | 30            |                  |
|                       | 45-54        | 129           | 48             | 140           | 65             | 269           | 113            | 80            | 87             | 51            | 167            | 79            | 133            | 47                   | 145            | 74            | 278            | 121           |                  |
|                       | 55-64        | 397           | 148            | 300           | 158            | 697           | 306            | 248           | 94             | 235           | 119            | 483           | 213            | 316                  | 127            | 338           | 151            | 654           | 278              |
|                       | 65-74        | 664           | 245            | 457           | 199            | 1,121         | 444            | 377           | 149            | 289           | 144            | 666           | 293            | 580                  | 203            | 454           | 213            | 1,034         | 416              |
|                       | 75-99        | 585           | 202            | 393           | 156            | 978           | 358            | 399           | 141            | 357           | 140            | 756           | 281            | 602                  | 191            | 574           | 240            | 1,176         | 431              |
|                       | <b>Total</b> | <b>1,795</b>  | <b>656</b>     | <b>1,319</b>  | <b>588</b>     | <b>3,114</b>  | <b>1,244</b>   | <b>1,119</b>  | <b>417</b>     | <b>994</b>    | <b>470</b>     | <b>2,113</b>  | <b>887</b>     | <b>1,648</b>         | <b>580</b>     | <b>1,538</b>  | <b>696</b>     | <b>3,186</b>  | <b>1,276</b>     |

**Table 6: Number of patients included in the analyses, both overall and 1-year survivors, by calendar period, age, sex, country and jurisdiction: lung cancer**

|                            |              | 1995-99 |                |        |                |         |                | 2000-02 |                |        |                |         |                | 2005-07 <sup>a</sup> |                |        |                |         |                  |
|----------------------------|--------------|---------|----------------|--------|----------------|---------|----------------|---------|----------------|--------|----------------|---------|----------------|----------------------|----------------|--------|----------------|---------|------------------|
|                            |              | Men     |                | Women  |                | Persons |                | Men     |                | Women  |                | Persons |                | Men                  |                | Women  |                | Persons |                  |
|                            |              | All     | 1-yr survivors | All    | 1-yr survivors | All     | 1-yr survivors | All     | 1-yr survivors | All    | 1-yr survivors | All     | 1-yr survivors | All                  | 1-yr survivors | All    | 1-yr survivors | All     | 1-year survivors |
| <b>Ontario</b>             | <b>15-44</b> | 407     | 188            | 463    | 230            | 870     | 418            | 251     | 123            | 308    | 175            | 559     | 298            | 283                  | 145            | 351    | 209            | 634     | 354              |
|                            | <b>45-54</b> | 1,594   | 663            | 1,430  | 734            | 3,024   | 1,397          | 1,045   | 443            | 934    | 478            | 1,979   | 921            | 1,234                | 516            | 1,493  | 714            | 2,727   | 1,230            |
|                            | <b>55-64</b> | 4,303   | 1,730          | 3,034  | 1,446          | 7,337   | 3,176          | 2,588   | 1,018          | 1,947  | 1,012          | 4,535   | 2,030          | 3,525                | 1,473          | 3,066  | 1,402          | 6,591   | 2,875            |
|                            | <b>65-74</b> | 7,599   | 2,759          | 4,744  | 2,031          | 12,343  | 4,790          | 4,400   | 1,656          | 2,975  | 1,271          | 7,375   | 2,927          | 5,494                | 2,193          | 4,436  | 1,924          | 9,930   | 4,117            |
|                            | <b>75-99</b> | 5,305   | 1,499          | 3,652  | 1,169          | 8,957   | 2,668          | 3,539   | 1,018          | 2,815  | 853            | 6,354   | 1,871          | 5,232                | 1,520          | 4,521  | 1,538          | 9,753   | 3,058            |
|                            | <b>Total</b> | 19,208  | 6,839          | 13,323 | 5,610          | 32,531  | 12,449         | 11,823  | 4,258          | 8,979  | 3,789          | 20,802  | 8,047          | 15,768               | 5,847          | 13,867 | 5,787          | 29,635  | 11,634           |
| <b>Denmark</b>             | <b>15-44</b> | 177     | 61             | 186    | 74             | 363     | 135            | 113     | 48             | 100    | 55             | 213     | 103            | 111                  | 51             | 145    | 58             | 256     | 109              |
|                            | <b>45-54</b> | 852     | 279            | 840    | 321            | 1,692   | 600            | 517     | 192            | 498    | 205            | 1,015   | 397            | 601                  | 250            | 760    | 314            | 1,361   | 564              |
|                            | <b>55-64</b> | 2,262   | 656            | 1,773  | 613            | 4,035   | 1,269          | 1,414   | 478            | 1,150  | 468            | 2,564   | 946            | 2,123                | 740            | 1,908  | 784            | 4,031   | 1,524            |
|                            | <b>65-74</b> | 3,698   | 883            | 2,461  | 638            | 6,159   | 1,521          | 2,374   | 652            | 1,695  | 539            | 4,069   | 1,191          | 2,901                | 964            | 2,456  | 888            | 5,357   | 1,852            |
|                            | <b>75-99</b> | 2,645   | 412            | 1,590  | 243            | 4,235   | 655            | 1,811   | 333            | 1,300  | 254            | 3,111   | 587            | 2,438                | 505            | 1,976  | 441            | 4,414   | 946              |
|                            | <b>Total</b> | 9,634   | 2,291          | 6,850  | 1,889          | 16,484  | 4,180          | 6,229   | 1,703          | 4,743  | 1,521          | 10,972  | 3,224          | 8,174                | 2,510          | 7,245  | 2,485          | 15,419  | 4,995            |
| <b>Norway</b>              | <b>15-44</b> | 120     | 67             | 100    | 45             | 220     | 112            | 56      | 62             | 118    | 62             | 118     | 70             | 34                   | 82             | 45     | 152            | 79      |                  |
|                            | <b>45-54</b> | 602     | 248            | 437    | 173            | 1,039   | 421            | 338     | 118            | 283    | 137            | 621     | 255            | 392                  | 165            | 368    | 173            | 760     | 338              |
|                            | <b>55-64</b> | 1,185   | 399            | 692    | 277            | 1,877   | 676            | 803     | 266            | 558    | 220            | 1,361   | 486            | 1,314                | 491            | 1,013  | 423            | 2,327   | 914              |
|                            | <b>65-74</b> | 2,366   | 661            | 1,143  | 371            | 3,509   | 1,032          | 1,314   | 395            | 769    | 262            | 2,083   | 657            | 1,693                | 637            | 1,177  | 460            | 2,870   | 1,097            |
|                            | <b>75-99</b> | 1,912   | 420            | 856    | 178            | 2,768   | 598            | 1,390   | 278            | 677    | 152            | 2,067   | 430            | 1,868                | 470            | 1,169  | 308            | 3,037   | 778              |
|                            | <b>Total</b> | 6,185   | 1,795          | 3,228  | 1,044          | 9,413   | 2,839          | 3,901   | 1,081          | 2,349  | 801            | 6,250   | 1,882          | 5,337                | 1,797          | 3,809  | 1,409          | 9,146   | 3,206            |
| <b>Swedish regions</b>     | <b>15-44</b> | 40      | 22             | 55     | 26             | 95      | 43             | 18      | 24             | 42     | 24             | 42      | 22             | 47                   | 22             | 49     | 27             | 96      | 49               |
|                            | <b>45-54</b> | 265     | 107            | 320    | 144            | 585     | 251            | 126     | 49             | 169    | 76             | 295     | 125            | 154                  | 69             | 212    | 105            | 366     | 174              |
|                            | <b>55-64</b> | 612     | 211            | 517    | 220            | 1,129   | 431            | 382     | 149            | 363    | 169            | 745     | 318            | 637                  | 258            | 764    | 331            | 1,401   | 589              |
|                            | <b>65-74</b> | 1,191   | 400            | 668    | 287            | 1,859   | 687            | 589     | 204            | 408    | 156            | 997     | 360            | 934                  | 366            | 775    | 319            | 1,709   | 685              |
|                            | <b>75-99</b> | 915     | 213            | 542    | 153            | 1,457   | 366            | 552     | 116            | 375    | 107            | 927     | 223            | 885                  | 271            | 731    | 225            | 1,616   | 496              |
|                            | <b>Total</b> | 3,023   | 948            | 2,102  | 830            | 5,125   | 1,778          | 1,667   | 524            | 1,339  | 523            | 3,006   | 1,047          | 2,657                | 986            | 2,531  | 1,007          | 5,188   | 1,993            |
| <b>UK-England</b>          | <b>15-44</b> | 1,046   | 354            | 877    | 343            | 1,923   | 697            | 602     | 244            | 550    | 245            | 1,152   | 489            | 776                  | 298            | 784    | 354            | 1,560   | 652              |
|                            | <b>45-54</b> | 5,660   | 1,725          | 3,794  | 1,307          | 9,454   | 3,032          | 3,118   | 970            | 2,507  | 926            | 5,625   | 1,896          | 3,510                | 1,170          | 3,129  | 1,240          | 6,639   | 2,410            |
|                            | <b>55-64</b> | 16,687  | 4,550          | 8,635  | 2,654          | 25,322  | 7,204          | 9,931   | 3,020          | 5,870  | 1,997          | 15,801  | 5,017          | 12,701               | 4,138          | 9,230  | 3,279          | 21,931  | 7,417            |
|                            | <b>65-74</b> | 34,890  | 7,819          | 19,574 | 4,482          | 54,464  | 12,301         | 18,358  | 4,613          | 10,946 | 2,969          | 29,304  | 7,582          | 20,910               | 6,147          | 14,008 | 4,440          | 34,918  | 10,587           |
|                            | <b>75-99</b> | 32,544  | 4,871          | 19,472 | 3,002          | 52,016  | 7,873          | 20,647  | 3,596          | 14,216 | 2,595          | 34,863  | 6,191          | 25,202               | 5,012          | 19,276 | 4,027          | 44,478  | 9,039            |
|                            | <b>Total</b> | 90,827  | 19,319         | 52,352 | 11,788         | 143,179 | 31,107         | 52,656  | 12,443         | 34,089 | 8,732          | 86,745  | 21,175         | 63,099               | 16,765         | 46,427 | 13,340         | 109,526 | 30,105           |
| <b>UK-Northern Ireland</b> | <b>15-44</b> | 46      | 19             | 28     | 74             | 131     | 61             | 27      | 31             | 18     | 31             | 17      | 32             | 14                   | 30             | 16     | 62             | 30      |                  |
|                            | <b>45-54</b> | 186     | 64             | 131    | 38             | 317     | 102            | 109     | 39             | 77     | 39             | 186     | 59             | 131                  | 50             | 113    | 37             | 244     | 87               |
|                            | <b>55-64</b> | 491     | 134            | 294    | 98             | 785     | 232            | 332     | 101            | 209    | 72             | 541     | 173            | 482                  | 151            | 312    | 109            | 794     | 260              |
|                            | <b>65-74</b> | 1,079   | 264            | 598    | 162            | 1,677   | 426            | 597     | 158            | 354    | 71             | 951     | 229            | 744                  | 201            | 460    | 145            | 1,204   | 346              |
|                            | <b>75-99</b> | 808     | 152            | 529    | 104            | 1,337   | 256            | 485     | 86             | 338    | 71             | 823     | 157            | 683                  | 140            | 507    | 130            | 1,190   | 270              |
|                            | <b>Total</b> | 2,610   | 633            | 1,580  | 414            | 4,190   | 1,047          | 1,536   | 390            | 996    | 245            | 2,532   | 635            | 2,072                | 556            | 1,422  | 437            | 3,494   | 993              |
| <b>UK-Wales</b>            | <b>15-44</b> | 49      | 18             | 60     | 28             | 109     | 46             | 33      | 14             | 29     | 62             | 26      | 56             | 22                   | 46             | 20     | 102            | 42      |                  |
|                            | <b>45-54</b> | 340     | 99             | 276    | 99             | 616     | 198            | 204     | 59             | 165    | 71             | 369     | 130            | 238                  | 75             | 244    | 105            | 482     | 180              |
|                            | <b>55-64</b> | 1,140   | 297            | 592    | 165            | 1,732   | 462            | 658     | 186            | 448    | 150            | 1,106   | 336            | 953                  | 296            | 708    | 246            | 1,661   | 542              |
|                            | <b>65-74</b> | 2,372   | 477            | 1,345  | 270            | 3,717   | 747            | 1,265   | 293            | 792    | 198            | 2,057   | 491            | 1,513                | 430            | 1,003  | 295            | 2,516   | 725              |
|                            | <b>75-99</b> | 2,106   | 277            | 1,187  | 158            | 3,293   | 435            | 1,376   | 206            | 894    | 141            | 2,270   | 347            | 1,702                | 293            | 1,313  | 277            | 3,015   | 570              |
|                            | <b>Total</b> | 6,007   | 1,168          | 3,460  | 720            | 9,467   | 1,888          | 3,536   | 758            | 2,328  | 572            | 5,864   | 1,330          | 4,462                | 1,116          | 3,314  | 943            | 7,776   | 2,059            |

<sup>a</sup> No. of patients included in the period analyses (see text and Figure 1) for 2005-07 are those who were diagnosed during 2005-07 and those who were diagnosed earlier but were alive on 1 January 2005

**Table 7: Number of patients included in the analyses, both overall and 1-year survivors, by calendar period, age, sex, country and jurisdiction: breast cancer (women)**

|                       |              | 1995-99 |                  | 2000-02 |                  | 2005-07 <sup>a</sup> |                  |
|-----------------------|--------------|---------|------------------|---------|------------------|----------------------|------------------|
|                       |              | All     | 1-year survivors | All     | 1-year survivors | All                  | 1-year survivors |
| Australian registries | 15-44        | 4,297   | 4,229            | 2,845   | 2,807            | 4,929                | 3,961            |
|                       | 45-54        | 7,487   | 7,361            | 4,885   | 4,802            | 8,525                | 6,734            |
|                       | 55-64        | 6,901   | 6,692            | 5,069   | 4,954            | 9,427                | 7,327            |
|                       | 65-74        | 6,562   | 6,242            | 4,115   | 3,931            | 6,790                | 5,274            |
|                       | 75-99        | 5,507   | 4,712            | 3,670   | 3,184            | 6,317                | 4,679            |
|                       | <b>Total</b> | 30,754  | 29,236           | 20,584  | 19,678           | 35,988               | 27,975           |
| New South Wales       | 15-44        | 2,437   | 2,395            | 1,630   | 1,606            | 2,779                | 2,254            |
|                       | 45-54        | 4,264   | 4,193            | 2,776   | 2,730            | 4,858                | 3,819            |
|                       | 55-64        | 3,979   | 3,871            | 2,961   | 2,898            | 5,575                | 4,354            |
|                       | 65-74        | 3,712   | 3,531            | 2,356   | 2,241            | 3,861                | 3,006            |
|                       | 75-99        | 3,111   | 2,662            | 2,145   | 1,883            | 3,663                | 2,704            |
|                       | <b>Total</b> | 17,503  | 16,652           | 11,868  | 11,358           | 20,736               | 16,137           |
| Victoria              | 15-44        | 1,860   | 1,834            | 1,215   | 1,201            | 2,150                | 1,707            |
|                       | 45-54        | 3,223   | 3,168            | 2,109   | 2,072            | 3,667                | 2,915            |
|                       | 55-64        | 2,922   | 2,821            | 2,108   | 2,056            | 3,852                | 2,973            |
|                       | 65-74        | 2,850   | 2,711            | 1,759   | 1,690            | 2,929                | 2,268            |
|                       | 75-99        | 2,396   | 2,050            | 1,525   | 1,301            | 2,654                | 1,975            |
|                       | <b>Total</b> | 13,251  | 12,584           | 8,716   | 8,320            | 15,252               | 11,838           |
| Canadian registries   | 15-44        | 7,442   | 7,261            | 4,524   | 4,438            | 8,056                | 6,418            |
|                       | 45-54        | 12,213  | 11,930           | 8,445   | 8,271            | 14,797               | 11,619           |
|                       | 55-64        | 11,814  | 11,442           | 8,214   | 7,984            | 15,643               | 12,057           |
|                       | 65-74        | 12,616  | 11,945           | 7,533   | 7,197            | 13,020               | 9,989            |
|                       | 75-99        | 11,365  | 9,894            | 7,387   | 6,408            | 13,240               | 9,714            |
|                       | <b>Total</b> | 55,450  | 52,472           | 36,103  | 34,298           | 64,756               | 49,797           |
| Alberta               | 15-44        | 1,112   | 1,085            | 671     | 650              | 1,207                | 944              |
|                       | 45-54        | 1,670   | 1,633            | 1,265   | 1,237            | 2,222                | 1,736            |
|                       | 55-64        | 1,569   | 1,524            | 1,120   | 1,093            | 2,043                | 1,566            |
|                       | 65-74        | 1,536   | 1,440            | 997     | 956              | 1,762                | 1,384            |
|                       | 75-99        | 1,407   | 1,213            | 1,000   | 860              | 1,778                | 1,323            |
|                       | <b>Total</b> | 7,294   | 6,895            | 5,053   | 4,796            | 9,012                | 6,953            |
| British Columbia      | 15-44        | 1,505   | 1,469            | 904     | 895              | 1,604                | 1,274            |
|                       | 45-54        | 2,577   | 2,517            | 1,792   | 1,755            | 2,994                | 2,390            |
|                       | 55-64        | 2,494   | 2,419            | 1,647   | 1,600            | 3,228                | 2,476            |
|                       | 65-74        | 2,730   | 2,606            | 1,508   | 1,448            | 2,663                | 2,022            |
|                       | 75-99        | 2,651   | 2,382            | 1,626   | 1,412            | 2,860                | 2,094            |
|                       | <b>Total</b> | 11,957  | 11,393           | 7,477   | 7,110            | 13,349               | 10,256           |
| Manitoba              | 15-44        | 390     | 377              | 221     | 216              | 351                  | 267              |
|                       | 45-54        | 692     | 678              | 443     | 435              | 790                  | 613              |
|                       | 55-64        | 695     | 671              | 482     | 468              | 896                  | 701              |
|                       | 65-74        | 756     | 711              | 392     | 370              | 706                  | 550              |
|                       | 75-99        | 847     | 745              | 523     | 463              | 917                  | 676              |
|                       | <b>Total</b> | 3,380   | 3,182            | 2,061   | 1,952            | 3,660                | 2,807            |
| Ontario               | 15-44        | 4,435   | 4,330            | 2,728   | 2,677            | 4,894                | 3,933            |
|                       | 45-54        | 7,274   | 7,102            | 4,945   | 4,844            | 8,791                | 6,880            |
|                       | 55-64        | 7,056   | 6,828            | 4,965   | 4,823            | 9,476                | 7,314            |
|                       | 65-74        | 7,594   | 7,188            | 4,636   | 4,423            | 7,889                | 6,033            |
|                       | 75-99        | 6,460   | 5,554            | 4,238   | 3,673            | 7,685                | 5,621            |
|                       | <b>Total</b> | 32,819  | 31,002           | 21,512  | 20,440           | 38,735               | 29,781           |

**Table 7: Number of patients included in the analyses, both overall and 1-year survivors, by calendar period, age, sex, country and jurisdiction: breast cancer (women)**

|                            |              | 1995-99 |                  | 2000-02 |                  | 2005-07 <sup>a</sup> |                  |
|----------------------------|--------------|---------|------------------|---------|------------------|----------------------|------------------|
|                            |              | All     | 1-year survivors | All     | 1-year survivors | All                  | 1-year survivors |
| <b>Denmark</b>             | <b>15-44</b> | 1,788   | 1,744            | 1,126   | 1,104            | 1,945                | 1,566            |
|                            | <b>45-54</b> | 3,933   | 3,813            | 2,498   | 2,438            | 3,855                | 3,041            |
|                            | <b>55-64</b> | 4,129   | 3,913            | 3,062   | 2,918            | 5,694                | 4,420            |
|                            | <b>65-74</b> | 3,681   | 3,358            | 2,332   | 2,178            | 4,464                | 3,435            |
|                            | <b>75-99</b> | 3,783   | 3,029            | 2,588   | 2,111            | 4,389                | 3,120            |
|                            | <b>Total</b> | 17,314  | 15,857           | 11,606  | 10,749           | 20,347               | 15,582           |
| <b>Norway</b>              | <b>15-44</b> | 1,323   | 1,280            | 828     | 810              | 1,498                | 1,174            |
|                            | <b>45-54</b> | 2,764   | 2,707            | 1,815   | 1,785            | 3,161                | 2,531            |
|                            | <b>55-64</b> | 2,437   | 2,350            | 2,162   | 2,116            | 3,896                | 3,075            |
|                            | <b>65-74</b> | 2,519   | 2,364            | 1,366   | 1,289            | 2,445                | 1,939            |
|                            | <b>75-99</b> | 2,994   | 2,538            | 1,858   | 1,573            | 3,121                | 2,304            |
|                            | <b>Total</b> | 12,037  | 11,239           | 8,029   | 7,573            | 14,121               | 11,023           |
| <b>Swedish regions</b>     | <b>15-44</b> | 1,106   | 1,095            | 667     | 662              | 1,287                | 1,023            |
|                            | <b>45-54</b> | 2,843   | 2,809            | 1,622   | 1,614            | 2,569                | 2,077            |
|                            | <b>55-64</b> | 2,712   | 2,667            | 2,220   | 2,198            | 3,943                | 3,150            |
|                            | <b>65-74</b> | 2,452   | 2,368            | 1,535   | 1,497            | 2,766                | 2,137            |
|                            | <b>75-99</b> | 2,623   | 2,323            | 1,404   | 1,260            | 2,851                | 2,109            |
|                            | <b>Total</b> | 11,736  | 11,262           | 7,448   | 7,231            | 13,416               | 10,496           |
| <b>UK-England</b>          | <b>15-44</b> | 17,899  | 17,277           | 11,476  | 11,164           | 20,545               | 16,368           |
|                            | <b>45-54</b> | 35,609  | 34,433           | 21,824  | 21,308           | 35,752               | 28,405           |
|                            | <b>55-64</b> | 34,083  | 32,375           | 24,064  | 23,181           | 45,629               | 35,979           |
|                            | <b>65-74</b> | 30,557  | 27,149           | 18,623  | 17,007           | 36,995               | 28,493           |
|                            | <b>75-99</b> | 37,373  | 28,012           | 24,124  | 18,767           | 41,505               | 28,907           |
|                            | <b>Total</b> | 155,521 | 139,246          | 100,111 | 91,427           | 180,426              | 138,152          |
| <b>UK-Northern Ireland</b> | <b>15-44</b> | 545     | 531              | 375     | 359              | 672                  | 542              |
|                            | <b>45-54</b> | 1,061   | 1,031            | 623     | 594              | 1,148                | 883              |
|                            | <b>55-64</b> | 1,007   | 964              | 718     | 680              | 1,375                | 1,059            |
|                            | <b>65-74</b> | 838     | 766              | 502     | 471              | 950                  | 722              |
|                            | <b>75-99</b> | 930     | 722              | 579     | 495              | 1,167                | 820              |
|                            | <b>Total</b> | 4,381   | 4,014            | 2,797   | 2,599            | 5,312                | 4,026            |
| <b>UK-Wales</b>            | <b>15-44</b> | 992     | 955              | 631     | 609              | 1,075                | 858              |
|                            | <b>45-54</b> | 2,150   | 2,073            | 1,371   | 1,331            | 2,140                | 1,688            |
|                            | <b>55-64</b> | 2,074   | 1,969            | 1,566   | 1,478            | 3,050                | 2,414            |
|                            | <b>65-74</b> | 2,087   | 1,798            | 1,255   | 1,111            | 2,450                | 1,836            |
|                            | <b>75-99</b> | 2,597   | 1,864            | 1,606   | 1,182            | 2,731                | 1,878            |
|                            | <b>Total</b> | 9,900   | 8,659            | 6,429   | 5,711            | 11,446               | 8,674            |

<sup>a</sup> No. of patients included in the period analyses (see text and Figure 1) for 2005-07 are those who were diagnosed during 2005-07 and those who were diagnosed earlier but were alive on 1 January 2005



**Table 8: Number of patients included in the analyses, both overall and 1-year survivors, by calendar period, age, sex, country and jurisdiction: ovarian cancer**

|                       |              | 1995-99 |                  | 2000-02 |                  | 2005-07 <sup>a</sup> |                  |
|-----------------------|--------------|---------|------------------|---------|------------------|----------------------|------------------|
|                       |              | All     | 1-year survivors | All     | 1-year survivors | All                  | 1-year survivors |
| Australian registries | 15-44        | 377     | 347              | 212     | 194              | 414                  | 303              |
|                       | 45-54        | 572     | 501              | 351     | 316              | 652                  | 480              |
|                       | 55-64        | 685     | 564              | 435     | 367              | 800                  | 588              |
|                       | 65-74        | 831     | 605              | 457     | 316              | 789                  | 530              |
|                       | 75-99        | 891     | 367              | 615     | 273              | 884                  | 402              |
|                       | <b>Total</b> | 3,356   | 2,384            | 2,070   | 1,466            | 3,539                | 2,303            |
| New South Wales       | 15-44        | 222     | 205              | 121     | 111              | 223                  | 159              |
|                       | 45-54        | 320     | 272              | 203     | 182              | 388                  | 293              |
|                       | 55-64        | 391     | 323              | 252     | 217              | 463                  | 338              |
|                       | 65-74        | 450     | 320              | 256     | 179              | 427                  | 290              |
|                       | 75-99        | 497     | 212              | 339     | 159              | 512                  | 232              |
|                       | <b>Total</b> | 1,880   | 1,332            | 1,171   | 848              | 2,013                | 1,312            |
| Victoria              | 15-44        | 155     | 142              | 91      | 83               | 191                  | 144              |
|                       | 45-54        | 252     | 229              | 148     | 134              | 264                  | 187              |
|                       | 55-64        | 294     | 241              | 183     | 150              | 337                  | 250              |
|                       | 65-74        | 381     | 285              | 201     | 137              | 362                  | 240              |
|                       | 75-99        | 394     | 155              | 276     | 114              | 372                  | 170              |
|                       | <b>Total</b> | 1,476   | 1,052            | 899     | 618              | 1,526                | 991              |
| Canadian registries   | 15-44        | 963     | 883              | 614     | 575              | 1,085                | 827              |
|                       | 45-54        | 1,357   | 1,171            | 930     | 829              | 1,614                | 1,168            |
|                       | 55-64        | 1,472   | 1,202            | 1,097   | 902              | 1,931                | 1,386            |
|                       | 65-74        | 1,969   | 1,409            | 1,093   | 813              | 1,876                | 1,239            |
|                       | 75-99        | 1,716   | 830              | 1,256   | 613              | 1,807                | 846              |
|                       | <b>Total</b> | 7,477   | 5,495            | 4,990   | 3,732            | 8,313                | 5,466            |
| Alberta               | 15-44        | 206     | 194              | 100     | 91               | 109                  | 80               |
|                       | 45-54        | 186     | 163              | 101     | 91               | 206                  | 154              |
|                       | 55-64        | 175     | 143              | 122     | 97               | 193                  | 142              |
|                       | 65-74        | 204     | 141              | 106     | 82               | 168                  | 109              |
|                       | 75-99        | 201     | 80               | 123     | 49               | 187                  | 78               |
|                       | <b>Total</b> | 972     | 721              | 552     | 410              | 863                  | 563              |
| British Columbia      | 15-44        | 148     | 132              | 86      | 83               | 156                  | 120              |
|                       | 45-54        | 256     | 221              | 164     | 147              | 272                  | 208              |
|                       | 55-64        | 242     | 209              | 179     | 161              | 321                  | 237              |
|                       | 65-74        | 357     | 261              | 168     | 130              | 311                  | 210              |
|                       | 75-99        | 350     | 177              | 237     | 108              | 312                  | 140              |
|                       | <b>Total</b> | 1,353   | 1,000            | 834     | 629              | 1,372                | 915              |
| Manitoba              | 15-44        | 48      | 39               | 27      | 26               | 46                   | 32               |
|                       | 45-54        | 56      | 51               | 44      | 35               | 87                   | 59               |
|                       | 55-64        | 79      | 66               | 51      | 42               | 103                  | 77               |
|                       | 65-74        | 97      | 73               | 75      | 56               | 94                   | 62               |
|                       | 75-99        | 117     | 41               | 80      | 44               | 104                  | 44               |
|                       | <b>Total</b> | 397     | 270              | 277     | 202              | 434                  | 274              |
| Ontario               | 15-44        | 561     | 518              | 401     | 376              | 774                  | 595              |
|                       | 45-54        | 859     | 736              | 621     | 556              | 1,049                | 747              |
|                       | 55-64        | 976     | 784              | 745     | 602              | 1,314                | 930              |
|                       | 65-74        | 1,311   | 934              | 744     | 545              | 1,303                | 858              |
|                       | 75-99        | 1,048   | 532              | 816     | 412              | 1,204                | 584              |
|                       | <b>Total</b> | 4,755   | 3,504            | 3,327   | 2,491            | 5,644                | 3,714            |

**Table 8: Number of patients included in the analyses, both overall and 1-year survivors, by calendar period, age, sex, country and jurisdiction: ovarian cancer**

|                            |              | 1995-99 |                  | 2000-02 |                  | 2005-07 <sup>a</sup> |                  |
|----------------------------|--------------|---------|------------------|---------|------------------|----------------------|------------------|
|                            |              | All     | 1-year survivors | All     | 1-year survivors | All                  | 1-year survivors |
| <b>Denmark</b>             | <b>15-44</b> | 275     | 238              | 161     | 149              | 199                  | 152              |
|                            | <b>45-54</b> | 568     | 487              | 317     | 268              | 431                  | 336              |
|                            | <b>55-64</b> | 716     | 550              | 452     | 366              | 774                  | 540              |
|                            | <b>65-74</b> | 807     | 491              | 511     | 341              | 709                  | 449              |
|                            | <b>75-99</b> | 667     | 239              | 426     | 172              | 577                  | 243              |
|                            | <b>Total</b> | 3,033   | 2,005            | 1,867   | 1,296            | 2,690                | 1,720            |
| <b>Norway</b>              | <b>15-44</b> | 234     | 220              | 144     | 134              | 174                  | 141              |
|                            | <b>45-54</b> | 449     | 398              | 253     | 226              | 374                  | 277              |
|                            | <b>55-64</b> | 476     | 407              | 348     | 312              | 631                  | 472              |
|                            | <b>65-74</b> | 583     | 400              | 324     | 247              | 442                  | 297              |
|                            | <b>75-99</b> | 643     | 270              | 427     | 188              | 571                  | 280              |
|                            | <b>Total</b> | 2,385   | 1,695            | 1,496   | 1,107            | 2,192                | 1,467            |
| <b>Swedish regions</b>     | <b>15-44</b> |         |                  |         |                  |                      |                  |
|                            | <b>45-54</b> |         |                  |         |                  |                      |                  |
|                            | <b>55-64</b> |         |                  |         |                  |                      |                  |
|                            | <b>65-74</b> |         |                  |         |                  |                      |                  |
|                            | <b>75-99</b> |         |                  |         |                  |                      |                  |
|                            | <b>Total</b> |         |                  |         |                  |                      |                  |
| <b>UK-England</b>          | <b>15-44</b> | 2,741   | 2,437            | 1,588   | 1,458            | 2,852                | 2,132            |
|                            | <b>45-54</b> | 4,375   | 3,554            | 2,508   | 2,085            | 3,646                | 2,624            |
|                            | <b>55-64</b> | 5,898   | 4,166            | 3,891   | 2,975            | 6,229                | 4,298            |
|                            | <b>65-74</b> | 6,739   | 3,828            | 4,059   | 2,453            | 5,838                | 3,519            |
|                            | <b>75-99</b> | 6,272   | 2,160            | 4,423   | 1,511            | 5,790                | 2,252            |
|                            | <b>Total</b> | 26,025  | 16,145           | 16,469  | 10,482           | 24,355               | 14,825           |
| <b>UK-Northern Ireland</b> | <b>15-44</b> | 115     | 107              | 81      | 76               | 120                  | 106              |
|                            | <b>45-54</b> | 163     | 125              | 84      | 68               | 135                  | 103              |
|                            | <b>55-64</b> | 203     | 150              | 116     | 92               | 215                  | 138              |
|                            | <b>65-74</b> | 206     | 123              | 132     | 92               | 204                  | 125              |
|                            | <b>75-99</b> | 159     | 61               | 123     | 38               | 151                  | 60               |
|                            | <b>Total</b> | 846     | 566              | 536     | 366              | 825                  | 532              |
| <b>UK-Wales</b>            | <b>15-44</b> | 166     | 146              | 100     | 90               | 163                  | 124              |
|                            | <b>45-54</b> | 305     | 227              | 168     | 146              | 243                  | 173              |
|                            | <b>55-64</b> | 424     | 283              | 276     | 208              | 448                  | 291              |
|                            | <b>65-74</b> | 534     | 279              | 305     | 152              | 429                  | 253              |
|                            | <b>75-99</b> | 497     | 172              | 312     | 112              | 414                  | 152              |
|                            | <b>Total</b> | 1,926   | 1,107            | 1,161   | 708              | 1,697                | 993              |

<sup>a</sup> No. of patients included in the period analyses (see text and Figure 1) for 2005-07 are those who were diagnosed during 2005-07 and those who were diagnosed earlier but were alive on 1 January 2005

**Table 9: Mean age at diagnosis (and standard deviation): cancer, jurisdiction and calendar period of diagnosis**

|                     | Calendar period |             |             |             |             |             |
|---------------------|-----------------|-------------|-------------|-------------|-------------|-------------|
|                     | 1995-1999       |             | 2000-2007   |             | Overall     |             |
|                     | Mean            | SD          | Mean        | SD          | Mean        | SD          |
| <b>Colorectal</b>   |                 |             |             |             |             |             |
| Alberta             | 69.6            | 12.7        | 69.0        | 13.0        | 69.2        | 12.9        |
| British Columbia    | 70.5            | 12.1        | 70.4        | 12.6        | 70.4        | 12.4        |
| Manitoba            | 70.5            | 12.4        | 70.5        | 13.0        | 70.5        | 12.8        |
| Ontario             | 69.5            | 12.2        | 69.5        | 12.5        | 69.5        | 12.4        |
| Denmark             | 71.1            | 11.8        | 70.9        | 11.7        | 71.0        | 11.8        |
| Norway              | 71.7            | 11.7        | 71.8        | 12.3        | 71.8        | 12.1        |
| Swedish regions     | 72.0            | 11.5        | 71.9        | 11.8        | 72.0        | 11.7        |
| UK-England          | 71.4            | 11.8        | 71.7        | 12.0        | 71.6        | 11.9        |
| UK-Northern Ireland | 70.4            | 12.0        | 70.2        | 11.9        | 70.2        | 12.0        |
| UK-Wales            | 71.3            | 11.7        | 71.5        | 11.7        | 71.4        | 11.7        |
| New South Wales     | 68.9            | 12.2        | 69.6        | 12.3        | 69.4        | 12.3        |
| Victoria            | 69.3            | 12.1        | 69.9        | 12.6        | 69.7        | 12.4        |
| <b>Overall</b>      | <b>70.8</b>     | <b>11.9</b> | <b>71.0</b> | <b>12.2</b> | <b>70.9</b> | <b>12.1</b> |
| <b>Lung</b>         |                 |             |             |             |             |             |
| Alberta             | 68.6            | 10.9        | 69.5        | 11.2        | 69.2        | 11.1        |
| British Columbia    | 69.0            | 11.2        | 70.3        | 11.1        | 69.8        | 11.1        |
| Manitoba            | 69.2            | 10.7        | 70.3        | 11.1        | 69.9        | 11.0        |
| Ontario             | 68.3            | 10.8        | 69.2        | 11.1        | 68.9        | 11.0        |
| Denmark             | 67.8            | 10.4        | 68.6        | 10.5        | 68.3        | 10.5        |
| Norway              | 68.4            | 10.8        | 69.4        | 10.8        | 69.0        | 10.8        |
| Swedish regions     | 68.1            | 10.5        | 68.9        | 10.6        | 68.6        | 10.6        |
| UK-England          | 70.8            | 10.3        | 71.5        | 10.7        | 71.2        | 10.5        |
| UK-Northern Ireland | 69.8            | 10.3        | 70.0        | 10.4        | 69.9        | 10.4        |
| UK-Wales            | 70.6            | 10.0        | 71.2        | 10.5        | 71.0        | 10.3        |
| New South Wales     | 69.3            | 10.6        | 70.2        | 11.1        | 69.9        | 10.9        |
| Victoria            | 69.8            | 10.5        | 70.7        | 11.1        | 70.4        | 10.9        |
| <b>Overall</b>      | <b>69.9</b>     | <b>10.5</b> | <b>70.6</b> | <b>10.8</b> | <b>70.3</b> | <b>10.7</b> |
| <b>Breast</b>       |                 |             |             |             |             |             |
| Alberta             | 60.9            | 14.5        | 61.1        | 14.3        | 61.0        | 14.4        |
| British Columbia    | 62.3            | 14.3        | 62.1        | 14.2        | 62.2        | 14.3        |
| Manitoba            | 63.4            | 14.5        | 63.5        | 14.5        | 63.4        | 14.5        |
| Ontario             | 61.6            | 14.3        | 61.6        | 14.1        | 61.6        | 14.1        |
| Denmark             | 62.6            | 14.0        | 63.1        | 13.8        | 62.9        | 13.9        |
| Norway              | 63.2            | 14.6        | 62.4        | 14.3        | 62.7        | 14.4        |
| Swedish regions     | 62.7            | 13.9        | 62.7        | 13.6        | 62.7        | 13.7        |
| UK-England          | 62.8            | 14.8        | 63.1        | 14.6        | 63.0        | 14.7        |
| UK-Northern Ireland | 61.6            | 14.6        | 62.0        | 14.6        | 61.8        | 14.6        |
| UK-Wales            | 63.9            | 14.7        | 64.0        | 14.3        | 63.9        | 14.5        |
| New South Wales     | 60.6            | 14.0        | 60.7        | 13.9        | 60.6        | 14.0        |
| Victoria            | 60.7            | 14.2        | 60.5        | 14.1        | 60.6        | 14.1        |
| <b>Overall</b>      | <b>62.4</b>     | <b>14.6</b> | <b>62.5</b> | <b>14.4</b> | <b>62.5</b> | <b>14.4</b> |
| <b>Ovary</b>        |                 |             |             |             |             |             |
| Alberta             | 59.7            | 16.7        | 62.0        | 15.7        | 61.1        | 16.1        |
| British Columbia    | 63.9            | 15.3        | 63.9        | 15.4        | 63.9        | 15.3        |
| Manitoba            | 64.9            | 15.7        | 64.7        | 15.4        | 64.8        | 15.5        |
| Ontario             | 63.0            | 14.7        | 62.9        | 15.3        | 62.9        | 15.1        |
| Denmark             | 63.4            | 13.7        | 64.6        | 13.5        | 64.2        | 13.6        |
| Norway              | 64.3            | 14.4        | 65.0        | 14.6        | 64.7        | 14.6        |
| Swedish regions     | -               | -           | -           | -           | -           | -           |
| UK-England          | 63.7            | 14.8        | 64.6        | 15.0        | 64.3        | 14.9        |
| UK-Northern Ireland | 61.3            | 15.1        | 62.6        | 15.5        | 62.1        | 15.4        |
| UK-Wales            | 64.9            | 14.1        | 65.4        | 14.4        | 65.2        | 14.3        |
| New South Wales     | 63.4            | 15.4        | 63.9        | 15.6        | 63.7        | 15.5        |
| Victoria            | 64.2            | 15.3        | 64.5        | 15.5        | 64.4        | 15.4        |
| <b>Overall</b>      | <b>63.6</b>     | <b>14.8</b> | <b>64.3</b> | <b>15.0</b> | <b>64.0</b> | <b>14.9</b> |

Swedish regions - no ovarian cancer data

**Table 10: Number and percentage of adults (15-99 years) diagnosed during 1995-2007 whose cancer was a second or higher-order primary: by cancer and jurisdiction**

|                     | Colorectal cancer                 |            |                | Breast cancer                     |            |                |
|---------------------|-----------------------------------|------------|----------------|-----------------------------------|------------|----------------|
|                     | Second and higher-order primaries |            | All primaries  | Second and higher-order primaries |            | All primaries  |
|                     | No.                               | %          |                | No.                               | %          |                |
| Alberta             | 2,240                             | 13.0       | 17,263         | 1,848                             | 8.7        | 21,255         |
| British Columbia    | 4,161                             | 14.6       | 28,418         | 3,241                             | 9.9        | 32,648         |
| Manitoba            | 1,319                             | 14.8       | 8,918          | 995                               | 11.0       | 9,061          |
| Ontario             | 6,823                             | 8.1        | 84,362         | 4,508                             | 4.9        | 92,597         |
| Denmark             | 3,658                             | 7.9        | 46,183         | 2,689                             | 5.5        | 49,001         |
| Norway              | 4,920                             | 12.0       | 40,909         | 2,808                             | 8.3        | 34,001         |
| Swedish regions     | 2,961                             | 12.6       | 23,554         | 2,844                             | 8.8        | 32,395         |
| UK-England          | 21,820                            | 6.2        | 352,801        | 18,198                            | 4.2        | 435,247        |
| UK-Northern Ireland | 417                               | 3.5        | 11,891         | 227                               | 1.8        | 12,464         |
| UK-Wales            | 1,955                             | 7.9        | 24,882         | 1,277                             | 4.6        | 27,828         |
| New South Wales     | 3,311                             | 6.3        | 52,303         | 1,154                             | 2.3        | 49,832         |
| Victoria            | 5,049                             | 12.5       | 40,521         | 2,009                             | 5.4        | 37,021         |
| <b>Overall</b>      | <b>58,634</b>                     | <b>8.0</b> | <b>732,005</b> | <b>41,798</b>                     | <b>5.0</b> | <b>833,350</b> |

  

|                     | Lung cancer                       |            |                | Ovarian cancer                    |            |                |
|---------------------|-----------------------------------|------------|----------------|-----------------------------------|------------|----------------|
|                     | Second and higher-order primaries |            | All primaries  | Second and higher-order primaries |            | All primaries  |
|                     | No.                               | %          |                | No.                               | %          |                |
| Alberta             | 2,756                             | 14.5       | 19,031         | 294                               | 12.0       | 2,454          |
| British Columbia    | 4,579                             | 14.7       | 31,123         | 377                               | 10.4       | 3,640          |
| Manitoba            | 1,646                             | 17.9       | 9,202          | 155                               | 13.5       | 1,146          |
| Ontario             | 7,793                             | 8.7        | 89,963         | 1,182                             | 8.5        | 13,970         |
| Denmark             | 4,173                             | 8.9        | 47,151         | 652                               | 8.4        | 7,773          |
| Norway              | 3,321                             | 12.1       | 27,383         | 664                               | 10.8       | 6,159          |
| Swedish regions     | 1,769                             | 12.1       | 14,605         | -                                 | -          | -              |
| UK-England          | 28,109                            | 7.5        | 376,496        | 4,741                             | 6.8        | 69,485         |
| UK-Northern Ireland | 462                               | 4.1        | 11,356         | 144                               | 6.3        | 2,296          |
| UK-Wales            | 2,465                             | 9.6        | 25,742         | 490                               | 9.8        | 5,003          |
| New South Wales     | 2,635                             | 7.3        | 36,251         | 316                               | 6.1        | 5,151          |
| Victoria            | 3,772                             | 14.0       | 27,027         | 422                               | 10.6       | 3,982          |
| <b>Overall</b>      | <b>63,480</b>                     | <b>8.9</b> | <b>715,330</b> | <b>9,437</b>                      | <b>7.8</b> | <b>121,059</b> |

Swedish regions - no ovarian cancer data

**Table 11: Number and percentage of patients dying within a month of diagnosis, by period of diagnosis and**

|                                                      | 1995-1999     |             | 2000-2007     |             | Overall        |             |
|------------------------------------------------------|---------------|-------------|---------------|-------------|----------------|-------------|
|                                                      | No.           | %           | No.           | %           | No.            | %           |
| <b>Colorectal</b>                                    |               |             |               |             |                |             |
| Alberta                                              | 398           | 7.0         | 777           | 6.8         | 1,175          | 6.9         |
| British Columbia                                     | 500           | 5.1         | 983           | 5.3         | 1,483          | 5.3         |
| Manitoba                                             | 184           | 5.7         | 321           | 5.7         | 505            | 5.7         |
| Ontario                                              | 2,732         | 9.4         | 4,388         | 8.0         | 7,120          | 8.5         |
| Denmark <sup>1</sup>                                 | -             | -           | 1,252         | 8.1         | 1,252          | 8.1         |
| Norway                                               | 746           | 5.1         | 1,517         | 5.8         | 2,263          | 5.6         |
| Swedish regions                                      | 343           | 4.6         | 643           | 4.0         | 986            | 4.2         |
| UK-England                                           | 16,383        | 12.6        | 22,111        | 10.0        | 38,494         | 11.0        |
| UK-Northern Ireland                                  | 391           | 8.8         | 506           | 6.9         | 897            | 7.6         |
| UK-Wales                                             | 1,173         | 12.5        | 1,521         | 9.9         | 2,694          | 10.9        |
| New South Wales <sup>2</sup>                         | -             | -           | -             | -           | -              | -           |
| Victoria                                             | 834           | 5.8         | 1,197         | 4.6         | 2,031          | 5.0         |
| <b>Overall</b>                                       | <b>23,684</b> | <b>10.4</b> | <b>35,216</b> | <b>8.4</b>  | <b>58,900</b>  | <b>9.1</b>  |
| <b>Overall excluding New South Wales and Denmark</b> | <b>23,684</b> | <b>10.4</b> | <b>33,964</b> | <b>8.5</b>  | <b>57,648</b>  | <b>9.2</b>  |
| <b>Lung</b>                                          |               |             |               |             |                |             |
| Alberta                                              | 1,246         | 19.1        | 2,406         | 19.4        | 3,652          | 19.3        |
| British Columbia                                     | 1,834         | 16.4        | 3,124         | 15.8        | 4,958          | 16.0        |
| Manitoba                                             | 410           | 13.2        | 896           | 14.9        | 1,306          | 14.3        |
| Ontario                                              | 7,776         | 23.9        | 13,951        | 24.5        | 21,727         | 24.3        |
| Denmark <sup>1</sup>                                 | -             | -           | 2,499         | 15.9        | 2,499          | 15.9        |
| Norway                                               | 1,304         | 13.9        | 2,748         | 15.4        | 4,052          | 14.9        |
| Swedish regions                                      | 828           | 16.2        | 1,046         | 11.1        | 1,874          | 12.8        |
| UK-England                                           | 37,635        | 26.3        | 53,415        | 23.1        | 91,050         | 24.3        |
| UK-Northern Ireland                                  | 904           | 21.6        | 1,457         | 20.5        | 2,361          | 20.9        |
| UK-Wales                                             | 2,812         | 29.7        | 3,923         | 24.3        | 6,735          | 26.3        |
| New South Wales <sup>2</sup>                         | -             | -           | -             | -           | -              | -           |
| Victoria                                             | 1,409         | 14.4        | 2,472         | 14.5        | 3,881          | 14.5        |
| <b>Overall</b>                                       | <b>56,158</b> | <b>24.0</b> | <b>87,937</b> | <b>21.4</b> | <b>144,095</b> | <b>22.4</b> |
| <b>Overall excluding New South Wales and Denmark</b> | <b>56,158</b> | <b>24.0</b> | <b>85,438</b> | <b>21.7</b> | <b>141,596</b> | <b>22.5</b> |
| <b>Breast</b>                                        |               |             |               |             |                |             |
| Alberta                                              | 83            | 1.1         | 118           | 0.9         | 201            | 1.0         |
| British Columbia                                     | 86            | 0.7         | 171           | 0.8         | 257            | 0.8         |
| Manitoba                                             | 25            | 0.7         | 47            | 0.8         | 72             | 0.8         |
| Ontario                                              | 565           | 1.7         | 883           | 1.5         | 1,448          | 1.6         |
| Denmark <sup>1</sup>                                 | -             | -           | 156           | 1.0         | 156            | 1.0         |
| Norway                                               | 90            | 0.7         | 180           | 0.8         | 270            | 0.8         |
| Swedish regions                                      | 43            | 0.4         | 50            | 0.2         | 93             | 0.3         |
| UK-England                                           | 5,279         | 3.4         | 5,686         | 2.1         | 10,965         | 2.5         |
| UK-Northern Ireland                                  | 77            | 1.8         | 88            | 1.1         | 165            | 1.3         |
| UK-Wales                                             | 424           | 4.3         | 491           | 2.8         | 915            | 3.3         |
| New South Wales <sup>2</sup>                         | -             | -           | -             | -           | -              | -           |
| Victoria                                             | 148           | 1.1         | 215           | 0.9         | 363            | 1.0         |
| <b>Overall</b>                                       | <b>6,820</b>  | <b>2.6</b>  | <b>8,085</b>  | <b>1.7</b>  | <b>14,905</b>  | <b>2.0</b>  |
| <b>Overall excluding New South Wales and Denmark</b> | <b>6,820</b>  | <b>2.6</b>  | <b>7,929</b>  | <b>1.7</b>  | <b>14,749</b>  | <b>2.0</b>  |
| <b>Ovary</b>                                         |               |             |               |             |                |             |
| Alberta                                              | 86            | 8.9         | 127           | 8.7         | 213            | 8.7         |
| British Columbia                                     | 107           | 7.9         | 180           | 7.9         | 287            | 7.9         |
| Manitoba                                             | 37            | 9.3         | 75            | 10.1        | 112            | 9.9         |
| Ontario                                              | 497           | 10.5        | 892           | 9.8         | 1,389          | 10.0        |
| Denmark <sup>1</sup>                                 | -             | -           | 156           | 6.9         | 156            | 6.9         |
| Norway                                               | 139           | 5.8         | 246           | 6.6         | 385            | 6.3         |
| Swedish regions                                      | -             | -           | -             | -           | -              | -           |
| UK-England                                           | 3,275         | 12.6        | 5,142         | 11.9        | 8,417          | 12.2        |
| UK-Northern Ireland                                  | 90            | 10.6        | 138           | 9.6         | 228            | 10.0        |
| UK-Wales                                             | 246           | 12.8        | 394           | 12.9        | 640            | 12.9        |
| New South Wales <sup>2</sup>                         | -             | -           | -             | -           | -              | -           |
| Victoria                                             | 130           | 8.8         | 193           | 7.8         | 323            | 8.2         |
| <b>Overall</b>                                       | <b>4,607</b>  | <b>11.5</b> | <b>7,543</b>  | <b>10.8</b> | <b>12,150</b>  | <b>11.1</b> |
| <b>Overall excluding New South Wales and Denmark</b> | <b>4,607</b>  | <b>11.5</b> | <b>7,387</b>  | <b>11.0</b> | <b>11,994</b>  | <b>11.2</b> |

<sup>1</sup> Full dates were only collected from 2004 onwards

<sup>2</sup> Full dates were not collected by this registry

<sup>3</sup> Swedish regions - no ovarian cancer data

**Table 12: Number of patients, age-standardised and age-specific relative survival estimates (%) at 1 and 5 years, and at 5 years conditional on survival to the first anniversary of diagnosis: cancer and jurisdiction, cohort analysis for 1995-99**

|                                    | Australia              |                 |             | Canada              |             |                  |             |             | Denmark     | Norway      | Swedish regions | United Kingdom |             |                  |             |             |
|------------------------------------|------------------------|-----------------|-------------|---------------------|-------------|------------------|-------------|-------------|-------------|-------------|-----------------|----------------|-------------|------------------|-------------|-------------|
|                                    | Australian registries  | New South Wales | Victoria    | Canadian registries | Alberta     | British Columbia | Manitoba    | Ontario     |             |             |                 | UK registries  | England     | Northern Ireland | Wales       |             |
| <b>Colorectal cancer (persons)</b> |                        |                 |             |                     |             |                  |             |             |             |             |                 |                |             |                  |             |             |
| <b>One year</b>                    | <b>No. of patients</b> | 32,621          | 18,358      | 14,263              | 47,832      | 5,661            | 9,736       | 3,254       | 29,181      | 16,393      | 14,703          | 7,382          | 144,088     | 130,276          | 4,430       | 9,382       |
|                                    | Age-standardised       | <b>80.0</b>     | <b>80.3</b> | <b>79.6</b>         | <b>79.1</b> | <b>77.6</b>      | <b>80.7</b> | <b>79.8</b> | <b>78.7</b> | <b>71.7</b> | <b>78.6</b>     | <b>81.8</b>    | <b>70.2</b> | <b>70.2</b>      | <b>74.3</b> | <b>68.3</b> |
|                                    | 15-44 years            | 87.0            | 87.6        | 86.3                | 83.7        | 81.3             | 85.6        | 86.2        | 83.4        | 82.8        | 83.3            | 86.4           | 80.6        | 80.6             | 83.2        | 78.8        |
|                                    | 45-54 years            | 85.8            | 84.8        | 87.2                | 84.5        | 82.6             | 83.9        | 83.1        | 85.3        | 78.2        | 83.7            | 87.1           | 80.2        | 80.1             | 82.9        | 80.1        |
|                                    | 55-64 years            | 83.6            | 83.7        | 83.4                | 83.1        | 80.8             | 84.2        | 86.4        | 82.9        | 77.3        | 83.6            | 82.7           | 77.4        | 77.3             | 81.8        | 75.7        |
|                                    | 65-74 years            | 80.9            | 81.7        | 79.9                | 80.1        | 80.0             | 82.3        | 79.8        | 79.4        | 71.8        | 79.9            | 82.9           | 71.2        | 71.2             | 74.7        | 68.8        |
|                                    | 75-99 years            | 72.1            | 72.6        | 71.4                | 71.5        | 69.7             | 73.9        | 71.7        | 70.9        | 62.0        | 70.2            | 76.6           | 57.0        | 57.0             | 62.2        | 54.6        |
| <b>Five years</b>                  | Age-standardised       | <b>60.0</b>     | <b>61.2</b> | <b>58.4</b>         | <b>58.1</b> | <b>56.3</b>      | <b>59.8</b> | <b>57.6</b> | <b>58.0</b> | <b>48.2</b> | <b>56.9</b>     | <b>58.5</b>    | <b>47.8</b> | <b>47.8</b>      | <b>51.1</b> | <b>45.9</b> |
|                                    | 15-44 years            | 66.2            | 69.2        | 62.6                | 60.8        | 58.5             | 60.2        | 67.5        | 60.8        | 58.0        | 58.4            | 60.6           | 56.4        | 56.6             | 55.3        | 54.2        |
|                                    | 45-54 years            | 63.9            | 63.7        | 64.1                | 61.4        | 58.8             | 61.7        | 57.1        | 62.3        | 50.7        | 57.0            | 60.8           | 53.2        | 53.1             | 57.4        | 52.8        |
|                                    | 55-64 years            | 62.4            | 63.2        | 61.3                | 59.6        | 58.5             | 59.5        | 58.6        | 59.9        | 49.9        | 62.1            | 60.3           | 52.4        | 52.3             | 56.2        | 51.7        |
|                                    | 65-74 years            | 60.9            | 62.4        | 59.1                | 59.3        | 59.7             | 62.1        | 59.3        | 58.3        | 48.9        | 59.0            | 59.2           | 48.4        | 48.5             | 52.0        | 44.7        |
|                                    | 75-99 years            | 53.9            | 55.5        | 52.1                | 53.9        | 49.4             | 56.9        | 52.8        | 53.8        | 42.7        | 50.2            | 55.0           | 39.2        | 39.2             | 42.6        | 37.6        |
| <b>Conditional 5-year</b>          | <b>No. of patients</b> | 24,926          | 14,094      | 10,832              | 36,002      | 4,168            | 7,448       | 2,443       | 21,943      | 10,851      | 10,733          | 5,666          | 92,915      | 83,994           | 3,053       | 5,868       |
|                                    | Age-standardised       | <b>75.0</b>     | <b>76.2</b> | <b>73.4</b>         | <b>73.6</b> | <b>72.5</b>      | <b>74.2</b> | <b>72.2</b> | <b>73.8</b> | <b>67.3</b> | <b>72.3</b>     | <b>71.6</b>    | <b>68.1</b> | <b>68.2</b>      | <b>68.8</b> | <b>67.2</b> |
|                                    | 15-44 years            | 76.1            | 79.1        | 72.6                | 72.6        | 71.9             | 70.3        | 78.3        | 72.9        | 70.1        | 70.1            | 70.2           | 70.0        | 70.2             | 66.5        | 68.8        |
|                                    | 45-54 years            | 74.4            | 75.1        | 73.5                | 72.7        | 71.1             | 73.5        | 68.8        | 73.1        | 64.9        | 68.1            | 69.9           | 66.4        | 66.4             | 69.3        | 65.9        |
|                                    | 55-64 years            | 74.6            | 75.5        | 73.4                | 71.7        | 72.4             | 70.6        | 67.8        | 72.3        | 64.5        | 74.3            | 72.9           | 67.7        | 67.7             | 68.7        | 68.3        |
|                                    | 65-74 years            | 75.3            | 76.3        | 74.0                | 74.1        | 74.7             | 75.4        | 74.4        | 73.5        | 68.2        | 73.8            | 71.4           | 68.0        | 68.1             | 69.6        | 65.0        |
|                                    | 75-99 years            | 74.8            | 76.3        | 72.9                | 75.3        | 70.9             | 76.9        | 73.6        | 75.8        | 68.8        | 71.6            | 71.8           | 68.8        | 68.8             | 68.6        | 68.8        |
| <b>Lung cancer (persons)</b>       |                        |                 |             |                     |             |                  |             |             |             |             |                 |                |             |                  |             |             |
| <b>One year</b>                    | <b>No. of patients</b> | 22,827          | 13,072      | 9,755               | 53,316      | 6,513            | 11,158      | 3,114       | 32,531      | 16,484      | 9,413           | 5,125          | 156,836     | 143,179          | 4,190       | 9,467       |
|                                    | Age-standardised       | <b>38.2</b>     | <b>38.6</b> | <b>37.8</b>         | <b>38.7</b> | <b>36.4</b>      | <b>36.6</b> | <b>41.7</b> | <b>39.6</b> | <b>26.4</b> | <b>32.3</b>     | <b>35.7</b>    | <b>24.3</b> | <b>24.3</b>      | <b>27.4</b> | <b>23.0</b> |
|                                    | 15-44 years            | 55.1            | 53.5        | 57.7                | 46.7        | 41.1             | 45.5        | 47.4        | 48.0        | 37.1        | 51.0            | 45.5           | 36.7        | 36.2             | 42.2        | 42.5        |
|                                    | 45-54 years            | 43.4            | 43.9        | 42.9                | 44.4        | 41.2             | 41.0        | 42.2        | 46.3        | 35.6        | 40.8            | 42.9           | 32.1        | 32.1             | 32.5        | 32.2        |
|                                    | 55-64 years            | 43.1            | 42.9        | 43.4                | 42.9        | 41.1             | 40.8        | 44.3        | 43.7        | 31.8        | 36.2            | 38.3           | 28.6        | 28.6             | 30.0        | 26.9        |
|                                    | 65-74 years            | 38.2            | 38.6        | 37.6                | 38.9        | 35.7             | 37.8        | 40.7        | 39.7        | 25.5        | 30.2            | 37.8           | 23.0        | 23.1             | 26.1        | 20.4        |
|                                    | 75-99 years            | 28.2            | 29.5        | 26.7                | 31.1        | 30.3             | 27.9        | 39.2        | 31.4        | 16.7        | 23.3            | 26.3           | 16.0        | 16.1             | 20.9        | 13.9        |
| <b>Five years</b>                  | Age-standardised       | <b>13.9</b>     | <b>14.2</b> | <b>13.4</b>         | <b>15.7</b> | <b>13.8</b>      | <b>13.9</b> | <b>16.6</b> | <b>16.6</b> | <b>8.0</b>  | <b>11.0</b>     | <b>12.7</b>    | <b>7.0</b>  | <b>6.9</b>       | <b>9.7</b>  | <b>7.5</b>  |
|                                    | 15-44 years            | 28.6            | 26.3        | 32.2                | 23.8        | 21.4             | 21.8        | 29.3        | 24.6        | 19.7        | 27.5            | 17.2           | 18.0        | 17.4             | 27.4        | 22.5        |
|                                    | 45-54 years            | 17.4            | 18.4        | 16.1                | 20.2        | 18.1             | 16.9        | 18.2        | 22.0        | 11.1        | 16.0            | 16.7           | 10.2        | 10.0             | 10.6        | 12.8        |
|                                    | 55-64 years            | 15.9            | 16.0        | 15.8                | 18.1        | 17.2             | 16.6        | 19.3        | 18.7        | 9.9         | 12.4            | 14.4           | 8.7         | 8.7              | 9.7         | 8.9         |
|                                    | 65-74 years            | 13.1            | 14.0        | 11.9                | 15.2        | 13.4             | 14.3        | 13.6        | 16.0        | 7.1         | 9.6             | 12.8           | 5.9         | 5.9              | 8.7         | 5.5         |
|                                    | 75-99 years            | 8.0             | 8.4         | 7.4                 | 10.4        | 7.9              | 8.2         | 13.9        | 11.4        | 3.4         | 5.2             | 8.5            | 2.9         | 2.8              | 5.9         | 2.5         |
| <b>Conditional 5-year</b>          | <b>No. of patients</b> | 8,010           | 4,596       | 3,414               | 19,781      | 2,202            | 3,886       | 1,244       | 12,449      | 4,180       | 2,839           | 1,778          | 34,042      | 31,107           | 1,047       | 1,888       |
|                                    | Age-standardised       | <b>35.1</b>     | <b>35.9</b> | <b>34.0</b>         | <b>39.9</b> | <b>37.0</b>      | <b>37.2</b> | <b>39.5</b> | <b>41.3</b> | <b>28.6</b> | <b>32.1</b>     | <b>35.1</b>    | <b>26.9</b> | <b>26.6</b>      | <b>33.8</b> | <b>29.2</b> |
|                                    | 15-44 years            | 51.9            | 49.2        | 55.9                | 51.0        | 52.0             | 48.0        | 61.8        | 51.2        | 53.2        | 53.9            | 37.8           | 48.9        | 47.9             | 65.0        | 52.9        |
|                                    | 45-54 years            | 40.0            | 41.9        | 37.6                | 45.6        | 43.8             | 41.3        | 43.3        | 47.4        | 31.2        | 39.1            | 38.9           | 31.9        | 31.3             | 32.6        | 39.9        |
|                                    | 55-64 years            | 36.9            | 37.3        | 36.4                | 42.3        | 41.8             | 40.7        | 43.4        | 42.7        | 31.2        | 34.2            | 37.4           | 30.5        | 30.2             | 32.4        | 33.0        |
|                                    | 65-74 years            | 34.3            | 36.3        | 31.6                | 39.2        | 37.6             | 37.9        | 33.4        | 40.3        | 28.0        | 31.8            | 33.8           | 25.8        | 25.5             | 33.2        | 26.9        |
|                                    | 75-99 years            | 28.3            | 28.6        | 27.8                | 33.6        | 26.2             | 29.4        | 35.6        | 36.3        | 20.3        | 22.5            | 32.3           | 17.9        | 17.5             | 28.5        | 18.3        |

**Table 12: Number of patients, age-standardised and age-specific relative survival estimates (%) at 1 and 5 years, and at 5 years conditional on survival to the first anniversary of diagnosis: cancer and jurisdiction, cohort analysis for 1995-99**

|                              |                         | Australia             |                 |             | Canada              |             |                  |             |             |             |             | United Kingdom  |               |             |                  |             |
|------------------------------|-------------------------|-----------------------|-----------------|-------------|---------------------|-------------|------------------|-------------|-------------|-------------|-------------|-----------------|---------------|-------------|------------------|-------------|
|                              |                         | Australian registries | New South Wales | Victoria    | Canadian registries | Alberta     | British Columbia | Manitoba    | Ontario     | Denmark     | Norway      | Swedish regions | UK registries | England     | Northern Ireland | Wales       |
| <b>Breast cancer (women)</b> |                         |                       |                 |             |                     |             |                  |             |             |             |             |                 |               |             |                  |             |
| <b>One year</b>              | <b>No. of patients</b>  | 30,754                | 17,503          | 13,251      | 55,450              | 7,294       | 11,957           | 3,380       | 32,819      | 17,314      | 12,037      | 11,736          | 169,802       | 155,521     | 4,381            | 9,900       |
|                              | <b>Age-standardised</b> | <b>95.8</b>           | <b>95.8</b>     | <b>95.6</b> | <b>95.9</b>         | <b>95.4</b> | <b>97.1</b>      | <b>96.2</b> | <b>95.5</b> | <b>93.0</b> | <b>95.4</b> | <b>97.6</b>     | <b>90.4</b>   | <b>90.5</b> | <b>92.6</b>      | <b>88.6</b> |
|                              | <b>15-44 years</b>      | 98.5                  | 98.4            | 98.7        | 97.7                | 97.7        | 97.7             | 96.7        | 97.7        | 97.7        | 96.8        | 99.1            | 96.6          | 96.6        | 97.5             | 96.4        |
|                              | <b>45-54 years</b>      | 98.5                  | 98.6            | 98.5        | 97.9                | 98.1        | 97.9             | 98.2        | 97.9        | 97.3        | 98.2        | 99.0            | 97.0          | 97.0        | 97.5             | 96.7        |
|                              | <b>55-64 years</b>      | 97.5                  | 97.9            | 97.1        | 97.5                | 97.8        | 97.6             | 97.2        | 97.4        | 95.7        | 97.0        | 98.9            | 95.7          | 95.7        | 96.6             | 95.7        |
|                              | <b>65-74 years</b>      | 96.7                  | 96.7            | 96.6        | 96.4                | 95.3        | 97.2             | 95.8        | 96.4        | 93.5        | 95.6        | 98.2            | 90.7          | 90.8        | 93.6             | 88.0        |
|                              | <b>75-99 years</b>      | 91.6                  | 91.6            | 91.7        | 93.0                | 92.0        | 96.0             | 94.8        | 91.6        | 87.6        | 92.6        | 95.1            | 81.6          | 81.7        | 85.3             | 78.4        |
| <b>Five years</b>            | <b>Age-standardised</b> | <b>85.0</b>           | <b>85.5</b>     | <b>84.4</b> | <b>85.3</b>         | <b>83.4</b> | <b>87.1</b>      | <b>86.0</b> | <b>84.9</b> | <b>76.9</b> | <b>81.8</b> | <b>86.7</b>     | <b>74.8</b>   | <b>74.8</b> | <b>77.5</b>      | <b>73.5</b> |
|                              | <b>15-44 years</b>      | 84.3                  | 84.6            | 83.9        | 82.4                | 82.9        | 80.7             | 79.7        | 83.0        | 79.5        | 80.5        | 83.9            | 78.3          | 78.3        | 79.7             | 77.8        |
|                              | <b>45-54 years</b>      | 88.2                  | 88.4            | 88.0        | 87.3                | 87.3        | 88.1             | 87.5        | 87.0        | 83.4        | 86.1        | 89.7            | 84.3          | 84.3        | 84.0             | 84.4        |
|                              | <b>55-64 years</b>      | 88.4                  | 89.0            | 87.5        | 87.1                | 87.0        | 87.2             | 85.9        | 87.2        | 80.9        | 85.6        | 90.6            | 83.1          | 83.1        | 83.4             | 83.1        |
|                              | <b>65-74 years</b>      | 88.0                  | 88.2            | 87.8        | 87.1                | 84.5        | 89.1             | 88.7        | 86.8        | 77.7        | 83.4        | 88.8            | 75.1          | 75.2        | 76.2             | 72.4        |
|                              | <b>75-99 years</b>      | 78.3                  | 79.0            | 77.3        | 81.9                | 77.9        | 86.1             | 84.2        | 80.7        | 69.7        | 75.6        | 81.0            | 63.0          | 62.9        | 70.8             | 61.5        |
| <b>Conditional 5-year</b>    | <b>No. of patients</b>  | 29,236                | 16,652          | 12,584      | 52,472              | 6,895       | 11,393           | 3,182       | 31,002      | 15,857      | 11,239      | 11,262          | 151,919       | 139,246     | 4,014            | 8,659       |
|                              | <b>Age-standardised</b> | <b>88.8</b>           | <b>89.1</b>     | <b>88.2</b> | <b>88.9</b>         | <b>87.3</b> | <b>89.7</b>      | <b>89.4</b> | <b>88.9</b> | <b>82.6</b> | <b>85.6</b> | <b>88.8</b>     | <b>82.5</b>   | <b>82.4</b> | <b>83.6</b>      | <b>82.7</b> |
|                              | <b>15-44 years</b>      | 85.6                  | 86.0            | 85.0        | 84.3                | 84.9        | 82.6             | 82.4        | 85.0        | 81.4        | 83.1        | 84.6            | 81.0          | 81.0        | 81.8             | 80.8        |
|                              | <b>45-54 years</b>      | 89.5                  | 89.7            | 89.4        | 89.2                | 89.0        | 90.0             | 89.0        | 88.9        | 85.7        | 87.7        | 90.6            | 86.9          | 86.9        | 86.2             | 87.3        |
|                              | <b>55-64 years</b>      | 90.6                  | 90.9            | 90.2        | 89.4                | 89.0        | 89.3             | 88.4        | 89.6        | 84.5        | 88.2        | 91.6            | 86.8          | 86.8        | 86.3             | 86.9        |
|                              | <b>65-74 years</b>      | 91.0                  | 91.1            | 90.9        | 90.4                | 88.6        | 91.7             | 92.5        | 90.1        | 83.1        | 87.3        | 90.5            | 82.8          | 82.9        | 81.4             | 82.2        |
|                              | <b>75-99 years</b>      | 85.4                  | 86.2            | 84.3        | 88.1                | 84.7        | 89.7             | 88.8        | 88.1        | 79.6        | 81.6        | 85.2            | 77.2          | 77.0        | 83.0             | 78.4        |
| <b>Ovarian cancer</b>        |                         |                       |                 |             |                     |             |                  |             |             |             |             |                 |               |             |                  |             |
| <b>One year</b>              | <b>No. of patients</b>  | 3,356                 | 1,880           | 1,476       | 7,477               | 972         | 1,353            | 397         | 4,755       | 3,033       | 2,385       | -               | 28,797        | 26,025      | 846              | 1,926       |
|                              | <b>Age-standardised</b> | <b>70.4</b>           | <b>70.4</b>     | <b>70.4</b> | <b>71.8</b>         | <b>69.4</b> | <b>74.0</b>      | <b>68.9</b> | <b>71.9</b> | <b>63.4</b> | <b>70.4</b> | -               | <b>59.6</b>   | <b>59.8</b> | <b>62.8</b>      | <b>56.6</b> |
|                              | <b>15-44 years</b>      | 92.1                  | 92.4            | 91.7        | 91.8                | 94.3        | 89.3             | 81.2        | 92.4        | 86.6        | 94.1        | -               | 89.1          | 89.0        | 93.1             | 88.0        |
|                              | <b>45-54 years</b>      | 87.8                  | 85.3            | 91.0        | 86.5                | 87.9        | 86.5             | 91.2        | 85.9        | 86.1        | 88.9        | -               | 80.9          | 81.5        | 77.0             | 74.7        |
|                              | <b>55-64 years</b>      | 82.9                  | 83.2            | 82.4        | 82.2                | 82.4        | 87.0             | 84.1        | 80.9        | 77.6        | 86.1        | -               | 71.0          | 71.2        | 74.5             | 67.3        |
|                              | <b>65-74 years</b>      | 74.1                  | 72.6            | 76.0        | 72.9                | 71.0        | 74.5             | 76.4        | 72.5        | 62.3        | 69.9        | -               | 57.7          | 57.9        | 61.2             | 53.2        |
|                              | <b>75-99 years</b>      | 44.4                  | 46.5            | 41.7        | 51.4                | 43.9        | 54.3             | 37.1        | 53.4        | 38.4        | 45.0        | -               | 36.6          | 36.5        | 41.8             | 36.5        |
| <b>Five years</b>            | <b>Age-standardised</b> | <b>36.1</b>           | <b>35.9</b>     | <b>36.4</b> | <b>38.2</b>         | <b>41.4</b> | <b>35.1</b>      | <b>32.7</b> | <b>39.0</b> | <b>31.5</b> | <b>37.2</b> | -               | <b>32.6</b>   | <b>32.5</b> | <b>39.0</b>      | <b>31.5</b> |
|                              | <b>15-44 years</b>      | 73.0                  | 71.0            | 75.9        | 74.0                | 84.5        | 65.9             | 56.4        | 73.7        | 62.3        | 72.6        | -               | 73.0          | 73.0        | 73.5             | 72.1        |
|                              | <b>45-54 years</b>      | 53.5                  | 53.1            | 54.0        | 53.8                | 58.6        | 52.9             | 48.8        | 53.4        | 45.5        | 53.7        | -               | 48.3          | 48.4        | 48.0             | 47.3        |
|                              | <b>55-64 years</b>      | 43.3                  | 42.1            | 44.8        | 43.9                | 44.7        | 46.0             | 41.8        | 43.4        | 36.9        | 46.8        | -               | 36.5          | 36.5        | 41.7             | 33.0        |
|                              | <b>65-74 years</b>      | 34.7                  | 35.7            | 33.6        | 33.2                | 39.3        | 27.0             | 36.5        | 33.8        | 27.2        | 33.3        | -               | 27.4          | 27.1        | 39.1             | 27.4        |
|                              | <b>75-99 years</b>      | 15.8                  | 15.8            | 15.7        | 23.5                | 23.4        | 19.8             | 9.1         | 26.4        | 18.4        | 18.1        | -               | 18.4          | 18.3        | 24.5             | 17.9        |
| <b>Conditional 5-year</b>    | <b>No. of patients</b>  | 2,384                 | 1,332           | 1,052       | 5,495               | 721         | 1,000            | 270         | 3,504       | 2,005       | 1,695       | -               | 17,818        | 16,145      | 566              | 1,107       |
|                              | <b>Age-standardised</b> | <b>48.8</b>           | <b>48.6</b>     | <b>49.2</b> | <b>51.9</b>         | <b>58.3</b> | <b>45.7</b>      | <b>43.7</b> | <b>53.3</b> | <b>48.9</b> | <b>50.6</b> | -               | <b>53.1</b>   | <b>52.8</b> | <b>63.0</b>      | <b>53.8</b> |
|                              | <b>15-44 years</b>      | 79.3                  | 76.9            | 82.7        | 80.6                | 89.7        | 73.9             | 69.5        | 79.7        | 71.9        | 77.2        | -               | 81.9          | 82.1        | 79.0             | 81.9        |
|                              | <b>45-54 years</b>      | 60.9                  | 62.2            | 59.3        | 62.2                | 66.6        | 61.1             | 53.5        | 62.2        | 52.9        | 60.5        | -               | 59.7          | 59.4        | 62.4             | 63.3        |
|                              | <b>55-64 years</b>      | 52.2                  | 50.6            | 54.4        | 53.4                | 54.3        | 52.8             | 49.7        | 53.6        | 47.6        | 54.3        | -               | 51.4          | 51.3        | 56.0             | 49.1        |
|                              | <b>65-74 years</b>      | 46.9                  | 49.2            | 44.3        | 45.6                | 55.4        | 36.2             | 47.8        | 46.6        | 43.7        | 47.7        | -               | 47.6          | 46.8        | 63.9             | 51.5        |
|                              | <b>75-99 years</b>      | 35.5                  | 33.9            | 37.7        | 45.7                | 53.4        | 36.4             | 24.6        | 49.5        | 48.0        | 40.2        | -               | 50.3          | 50.0        | 64.2             | 49.1        |

Some age-standardised estimates arise from imputed age-specific estimates (see text)

Patients included in conditional five-year survival estimates are those who survived at least one year after diagnosis (see text)

Patients included in the period analysis are those who were diagnosed during 2005-07, or diagnosed earlier but alive on 1 January 2005 (see text and Figure 1 in *The Lancet* article)

**Table 13: Number of patients, age-standardised and age-specific relative survival estimates (%) at one and five years, and at 5 years conditional on survival to the first anniversary of diagnosis: cancer and jurisdiction, cohort analysis for 2000-02**

|                                    | Australia               |                 |             | Canada              |             |                  |             |             | Denmark     | Norway      | Swedish regions | United Kingdom |             |                  |             |             |
|------------------------------------|-------------------------|-----------------|-------------|---------------------|-------------|------------------|-------------|-------------|-------------|-------------|-----------------|----------------|-------------|------------------|-------------|-------------|
|                                    | Australian registries   | New South Wales | Victoria    | Canadian registries | Alberta     | British Columbia | Manitoba    | Ontario     |             |             |                 | UK registries  | England     | Northern Ireland | Wales       |             |
| <b>Colorectal cancer (persons)</b> |                         |                 |             |                     |             |                  |             |             |             |             |                 |                |             |                  |             |             |
| <b>One year</b>                    | <b>No. of patients</b>  | 21,665          | 12,075      | 9,590               | 32,749      | 4,027            | 6,759       | 2,095       | 19,868      | 10,436      | 9,518           | 5,786          | 88,999      | 80,838           | 2,590       | 5,571       |
|                                    | <b>Age-standardised</b> | <b>82.5</b>     | <b>83.2</b> | <b>81.6</b>         | <b>81.5</b> | <b>79.8</b>      | <b>82.4</b> | <b>80.4</b> | <b>81.7</b> | <b>73.9</b> | <b>78.7</b>     | <b>82.8</b>    | <b>73.0</b> | <b>72.9</b>      | <b>76.8</b> | <b>72.3</b> |
|                                    | <b>15-44 years</b>      | 90.8            | 92.0        | 89.5                | 88.0        | 85.6             | 89.5        | 81.4        | 88.8        | 82.1        | 86.2            | 88.6           | 84.4        | 84.0             | 89.1        | 86.8        |
|                                    | <b>45-54 years</b>      | 87.9            | 88.3        | 87.5                | 87.3        | 84.1             | 86.7        | 90.1        | 87.9        | 84.5        | 83.2            | 85.7           | 81.7        | 81.6             | 84.3        | 81.6        |
|                                    | <b>55-64 years</b>      | 87.3            | 88.4        | 85.7                | 85.9        | 85.5             | 86.1        | 80.0        | 86.5        | 82.5        | 85.0            | 86.8           | 80.4        | 80.4             | 83.3        | 77.9        |
|                                    | <b>65-74 years</b>      | 83.5            | 83.9        | 82.9                | 82.6        | 81.5             | 82.8        | 84.1        | 82.6        | 72.9        | 79.7            | 83.1           | 74.3        | 74.2             | 77.7        | 73.6        |
|                                    | <b>75-99 years</b>      | 73.5            | 74.1        | 72.8                | 73.0        | 70.5             | 75.4        | 72.8        | 72.6        | 61.7        | 69.0            | 76.9           | 59.4        | 59.2             | 64.5        | 59.1        |
| <b>Five years</b>                  | <b>Age-standardised</b> | <b>63.4</b>     | <b>65.1</b> | <b>61.1</b>         | <b>60.9</b> | <b>58.0</b>      | <b>61.5</b> | <b>59.6</b> | <b>61.3</b> | <b>51.7</b> | <b>58.8</b>     | <b>60.6</b>    | <b>51.3</b> | <b>51.2</b>      | <b>54.3</b> | <b>50.3</b> |
|                                    | <b>15-44 years</b>      | 69.0            | 71.6        | 66.1                | 63.8        | 63.7             | 65.6        | 57.9        | 63.9        | 60.1        | 68.0            | 64.5           | 59.5        | 59.0             | 64.8        | 64.6        |
|                                    | <b>45-54 years</b>      | 66.6            | 68.6        | 64.1                | 63.8        | 59.8             | 62.6        | 68.1        | 64.6        | 57.3        | 62.5            | 59.5           | 56.3        | 56.4             | 58.4        | 54.4        |
|                                    | <b>55-64 years</b>      | 67.9            | 69.5        | 65.6                | 64.2        | 62.6             | 63.5        | 60.7        | 65.1        | 56.0        | 62.3            | 64.0           | 56.3        | 56.6             | 55.1        | 52.9        |
|                                    | <b>65-74 years</b>      | 64.9            | 67.0        | 62.2                | 62.4        | 62.4             | 62.5        | 63.8        | 62.1        | 50.5        | 58.8            | 60.2           | 52.5        | 52.5             | 55.1        | 51.7        |
|                                    | <b>75-99 years</b>      | 55.5            | 56.7        | 54.1                | 54.8        | 47.8             | 57.5        | 51.6        | 55.6        | 45.1        | 52.1            | 57.9           | 41.9        | 41.7             | 48.8        | 41.8        |
| <b>Conditional 5-year</b>          | <b>No. of patients</b>  | 17,004          | 9,566       | 7,438               | 25,409      | 3,073            | 5,269       | 1,591       | 15,476      | 7,112       | 6,918           | 4,503          | 59,437      | 53,885           | 1,864       | 3,688       |
|                                    | <b>Age-standardised</b> | <b>76.7</b>     | <b>78.2</b> | <b>74.9</b>         | <b>74.7</b> | <b>72.5</b>      | <b>74.8</b> | <b>74.0</b> | <b>75.2</b> | <b>70.1</b> | <b>74.7</b>     | <b>73.3</b>    | <b>70.3</b> | <b>70.3</b>      | <b>71.1</b> | <b>69.7</b> |
|                                    | <b>15-44 years</b>      | 76.0            | 77.9        | 73.8                | 72.5        | 74.5             | 73.3        | 71.1        | 72.0        | 73.2        | 78.9            | 72.7           | 70.6        | 70.2             | 72.7        | 74.4        |
|                                    | <b>45-54 years</b>      | 75.7            | 77.7        | 73.3                | 73.1        | 71.1             | 72.2        | 75.6        | 73.5        | 67.8        | 75.1            | 69.4           | 68.9        | 69.1             | 69.3        | 66.7        |
|                                    | <b>55-64 years</b>      | 77.8            | 78.6        | 76.6                | 74.7        | 73.2             | 73.8        | 75.8        | 75.3        | 67.9        | 73.3            | 73.8           | 70.1        | 70.4             | 66.2        | 67.9        |
|                                    | <b>65-74 years</b>      | 77.7            | 79.8        | 75.1                | 75.5        | 76.5             | 75.5        | 75.9        | 75.2        | 69.2        | 73.8            | 72.5           | 70.7        | 70.7             | 70.9        | 70.2        |
|                                    | <b>75-99 years</b>      | 75.5            | 76.5        | 74.3                | 75.0        | 67.9             | 76.3        | 70.8        | 76.5        | 73.1        | 75.6            | 75.4           | 70.6        | 70.5             | 75.6        | 70.8        |
| <b>Lung cancer (persons)</b>       |                         |                 |             |                     |             |                  |             |             |             |             |                 |                |             |                  |             |             |
| <b>One year</b>                    | <b>No. of patients</b>  | 14,306          | 8,228       | 6,078               | 34,156      | 4,264            | 6,977       | 2,113       | 20,802      | 10,972      | 6,250           | 3,006          | 95,141      | 86,745           | 2,532       | 5,864       |
|                                    | <b>Age-standardised</b> | <b>40.9</b>     | <b>41.5</b> | <b>39.9</b>         | <b>39.7</b> | <b>36.3</b>      | <b>37.5</b> | <b>44.1</b> | <b>40.5</b> | <b>31.3</b> | <b>32.2</b>     | <b>36.6</b>    | <b>27.5</b> | <b>27.5</b>      | <b>28.3</b> | <b>25.9</b> |
|                                    | <b>15-44 years</b>      | 55.2            | 58.9        | 49.5                | 51.3        | 39.7             | 50.7        | 51.1        | 53.4        | 48.6        | 45.7            | 49.6           | 42.9        | 42.5             | 55.4        | 42.3        |
|                                    | <b>45-54 years</b>      | 49.6            | 49.8        | 49.2                | 44.6        | 37.5             | 42.1        | 47.4        | 46.7        | 39.3        | 41.1            | 42.5           | 33.8        | 33.8             | 31.8        | 35.3        |
|                                    | <b>55-64 years</b>      | 44.8            | 44.9        | 44.6                | 43.4        | 39.8             | 39.6        | 44.6        | 45.2        | 37.3        | 36.0            | 43.1           | 31.9        | 32.0             | 32.5        | 30.6        |
|                                    | <b>65-74 years</b>      | 40.0            | 40.6        | 39.3                | 40.1        | 38.1             | 38.7        | 45.1        | 40.5        | 30.1        | 32.3            | 36.8           | 26.2        | 26.4             | 24.8        | 24.3        |
|                                    | <b>75-99 years</b>      | 31.5            | 32.2        | 30.7                | 31.3        | 30.5             | 29.6        | 39.7        | 31.0        | 20.4        | 22.3            | 25.7           | 18.8        | 18.9             | 20.5        | 16.1        |
| <b>Five years</b>                  | <b>Age-standardised</b> | <b>15.1</b>     | <b>16.2</b> | <b>13.6</b>         | <b>15.9</b> | <b>13.1</b>      | <b>14.0</b> | <b>19.4</b> | <b>16.7</b> | <b>9.6</b>  | <b>11.0</b>     | <b>11.6</b>    | <b>8.1</b>  | <b>8.0</b>       | <b>9.7</b>  | <b>7.6</b>  |
|                                    | <b>15-44 years</b>      | 32.0            | 34.1        | 29.0                | 25.1        | 19.8             | 22.2        | 17.3        | 27.4        | 22.2        | 0.0             | 0.0            | 21.5        | 21.3             | 32.9        | 19.8        |
|                                    | <b>45-54 years</b>      | 19.8            | 21.3        | 17.4                | 20.2        | 17.1             | 18.0        | 19.4        | 21.6        | 13.1        | 17.0            | 14.4           | 10.3        | 10.2             | 11.0        | 11.2        |
|                                    | <b>55-64 years</b>      | 15.6            | 15.7        | 15.5                | 17.9        | 14.9             | 14.8        | 21.7        | 18.9        | 11.1        | 13.8            | 15.3           | 9.5         | 9.6              | 10.7        | 8.6         |
|                                    | <b>65-74 years</b>      | 14.2            | 15.6        | 12.4                | 15.4        | 12.7             | 14.6        | 21.0        | 15.7        | 8.8         | 10.8            | 10.8           | 7.1         | 7.1              | 7.8         | 6.3         |
|                                    | <b>75-99 years</b>      | 9.6             | 10.8        | 8.0                 | 10.8        | 8.8              | 8.9         | 16.7        | 11.2        | 4.8         | 4.9             | 7.4            | 3.7         | 3.7              | 4.8         | 3.7         |
| <b>Conditional 5-year</b>          | <b>No. of patients</b>  | 5,323           | 3,074       | 2,249               | 12,826      | 1,436            | 2,456       | 887         | 8,047       | 3,224       | 1,882           | 1,047          | 23,140      | 21,175           | 635         | 1,330       |
|                                    | <b>Age-standardised</b> | <b>36.0</b>     | <b>38.1</b> | <b>33.0</b>         | <b>39.4</b> | <b>35.6</b>      | <b>36.5</b> | <b>44.2</b> | <b>40.5</b> | <b>29.4</b> | <b>32.8</b>     | <b>31.5</b>    | <b>27.6</b> | <b>27.4</b>      | <b>31.8</b> | <b>27.7</b> |
|                                    | <b>15-44 years</b>      | 58.1            | 57.8        | 58.6                | 49.0        | 49.9             | 43.8        | 33.9        | 51.3        | 45.7        | 0.0             | 0.0            | 50.2        | 50.0             | 59.4        | 46.7        |
|                                    | <b>45-54 years</b>      | 40.0            | 42.8        | 35.5                | 45.2        | 45.7             | 42.6        | 40.9        | 46.3        | 33.4        | 41.4            | 33.8           | 30.4        | 30.2             | 34.5        | 31.7        |
|                                    | <b>55-64 years</b>      | 34.8            | 34.9        | 34.7                | 41.1        | 37.4             | 37.4        | 48.6        | 41.9        | 29.7        | 38.4            | 35.5           | 29.9        | 29.9             | 32.9        | 28.0        |
|                                    | <b>65-74 years</b>      | 35.5            | 38.5        | 31.5                | 38.4        | 33.3             | 37.9        | 46.6        | 38.8        | 29.1        | 33.5            | 29.4           | 27.1        | 27.0             | 31.5        | 26.0        |
|                                    | <b>75-99 years</b>      | 30.3            | 33.6        | 26.0                | 34.4        | 28.9             | 30.1        | 42.1        | 36.1        | 23.7        | 22.0            | 29.0           | 19.6        | 19.3             | 23.5        | 22.7        |



**Table 13: Number of patients, age-standardised and age-specific relative survival estimates (%) at one and five years, and at 5 years conditional on survival to the first anniversary of diagnosis: cancer and jurisdiction, cohort analysis for 2000-02**

|                              |          | Australia             |                  |             | Canada              |             |                  |             |             |             |             | United Kingdom  |               |             |                  |             |             |             |
|------------------------------|----------|-----------------------|------------------|-------------|---------------------|-------------|------------------|-------------|-------------|-------------|-------------|-----------------|---------------|-------------|------------------|-------------|-------------|-------------|
|                              |          | Australian registries | New South Wales  | Victoria    | Canadian registries | Alberta     | British Columbia | Manitoba    | Ontario     | Denmark     | Norway      | Swedish regions | UK registries | England     | Northern Ireland | Wales       |             |             |
| <b>Breast cancer (women)</b> |          |                       |                  |             |                     |             |                  |             |             |             |             |                 |               |             |                  |             |             |             |
| Breast cancer (women)        | One year | No. of patients       | 20,584           | 11,868      | 8,716               | 36,103      | 5,053            | 7,477       | 2,061       | 21,512      | 11,606      | 8,029           | 7,448         | 109,337     | 100,111          | 2,797       | 6,429       |             |
|                              |          | Age-standardised      | <b>96.3</b>      | <b>96.5</b> | <b>96.0</b>         | <b>96.2</b> | <b>95.9</b>      | <b>96.5</b> | <b>96.4</b> | <b>96.0</b> | <b>94.3</b> | <b>95.8</b>     | <b>98.4</b>   | <b>92.4</b> | <b>92.5</b>      | <b>95.0</b> | <b>89.8</b> |             |
|                              |          | 15-44 years           | 98.8             | 98.6        | 98.9                | 98.2        | 96.9             | 99.0        | 97.8        | 98.2        | 98.1        | 97.9            | 99.3          | 97.3        | 97.4             | 95.8        | 96.6        |             |
|                              |          | 45-54 years           | 98.5             | 98.5        | 98.5                | 98.2        | 98.0             | 98.2        | 98.4        | 98.2        | 98.0        | 98.6            | 99.7          | 97.8        | 97.9             | 95.6        | 97.4        |             |
|                              |          | 55-64 years           | 98.2             | 98.4        | 98.0                | 97.8        | 98.1             | 97.8        | 97.6        | 97.7        | 96.1        | 98.4            | 99.5          | 96.8        | 97.0             | 95.4        | 95.0        |             |
|                              |          | 65-74 years           | 96.9             | 96.5        | 97.4                | 97.1        | 97.2             | 97.7        | 96.0        | 97.0        | 95.6        | 95.9            | 99.1          | 93.0        | 93.1             | 95.8        | 90.3        |             |
|                              |          | 75-99 years           | 92.7             | 93.6        | 91.3                | 92.5        | 91.7             | 93.1        | 94.7        | 92.2        | 89.1        | 92.0            | 96.2          | 85.0        | 85.0             | 93.5        | 80.5        |             |
|                              |          | Five years            | Age-standardised | <b>87.0</b> | <b>87.4</b>         | <b>86.5</b> | <b>86.4</b>      | <b>84.9</b> | <b>87.5</b> | <b>83.9</b> | <b>86.6</b> | <b>81.5</b>     | <b>83.8</b>   | <b>89.3</b> | <b>78.8</b>      | <b>78.8</b> | <b>81.6</b> | <b>76.7</b> |
|                              |          |                       | 15-44 years      | 86.7        | 87.0                | 86.2        | 85.8             | 84.9        | 88.1        | 86.5        | 85.2        | 85.9            | 83.6          | 89.6        | 81.9             | 82.0        | 77.5        | 82.0        |
|                              |          |                       | 45-54 years      | 89.3        | 89.7                | 88.9        | 88.8             | 86.6        | 90.0        | 90.5        | 88.9        | 87.0            | 90.7          | 92.7        | 87.2             | 87.4        | 79.9        | 86.4        |
|                              |          |                       | 55-64 years      | 90.8        | 90.8                | 90.7        | 88.8             | 89.2        | 88.9        | 86.3        | 88.9        | 84.4            | 89.7          | 93.0        | 87.1             | 87.3        | 82.0        | 85.4        |
|                              |          |                       | 65-74 years      | 89.2        | 89.5                | 88.9        | 89.2             | 88.3        | 89.8        | 83.7        | 89.7        | 83.0            | 85.2          | 93.1        | 79.5             | 79.6        | 80.6        | 77.8        |
|                              |          |                       | 75-99 years      | 81.0        | 81.9                | 79.8        | 80.8             | 77.4        | 82.9        | 78.9        | 81.0        | 74.5            | 74.9          | 81.0        | 67.3             | 67.1        | 84.0        | 63.4        |
|                              |          | Conditional 5-year    | No. of patients  | 19,678      | 11,358              | 8,320       | 34,298           | 4,796       | 7,110       | 1,952       | 20,440      | 10,749          | 7,573         | 7,231       | 99,737           | 91,427      | 2,599       | 5,711       |
|                              |          | Age-standardised      | <b>90.3</b>      | <b>90.6</b> | <b>90.0</b>         | <b>89.8</b> | <b>88.5</b>      | <b>90.6</b> | <b>87.0</b> | <b>90.2</b> | <b>86.4</b> | <b>87.3</b>     | <b>90.6</b>   | <b>85.0</b> | <b>85.0</b>      | <b>86.3</b> | <b>85.1</b> |             |
|                              |          | 15-44 years           | 87.8             | 88.2        | 87.2                | 87.4        | 87.6             | 89.0        | 88.4        | 86.7        | 87.5        | 85.4            | 90.2          | 84.2        | 84.2             | 80.9        | 84.8        |             |
|                              |          | 45-54 years           | 90.7             | 91.0        | 90.3                | 90.5        | 88.3             | 91.7        | 92.0        | 90.5        | 88.8        | 92.0            | 93.0          | 89.1        | 89.3             | 83.6        | 88.8        |             |
|                              |          | 55-64 years           | 92.4             | 92.3        | 92.5                | 90.8        | 90.9             | 90.9        | 88.4        | 91.0        | 87.8        | 91.1            | 93.5          | 89.9        | 90.0             | 85.9        | 89.9        |             |
|                              |          | 65-74 years           | 92.1             | 92.7        | 91.2                | 91.8        | 90.8             | 92.0        | 87.2        | 92.5        | 86.8        | 88.8            | 94.0          | 85.4        | 85.4             | 84.1        | 86.2        |             |
|                              |          | 75-99 years           | 87.4             | 87.4        | 87.4                | 87.3        | 84.4             | 89.0        | 83.2        | 87.9        | 83.6        | 81.3            | 84.2          | 79.2        | 78.9             | 91.4        | 78.7        |             |
| <b>Ovarian cancer</b>        |          |                       |                  |             |                     |             |                  |             |             |             |             |                 |               |             |                  |             |             |             |
| Ovarian cancer               | One year | No. of patients       | 2,070            | 1,171       | 899                 | 4,990       | 552              | 834         | 277         | 3,327       | 1,867       | 1,496           | -             | 18,166      | 16,469           | 536         | 1,161       |             |
|                              |          | Age-standardised      | <b>71.1</b>      | <b>72.8</b> | <b>68.9</b>         | <b>73.3</b> | <b>71.0</b>      | <b>75.3</b> | <b>74.1</b> | <b>73.1</b> | <b>67.9</b> | <b>74.3</b>     | -             | <b>62.4</b> | <b>62.6</b>      | <b>64.9</b> | <b>60.0</b> |             |
|                              |          | 15-44 years           | 91.6             | 91.8        | 91.2                | 93.7        | 91.2             | 96.6        | 92.7        | 93.8        | 92.6        | 93.1            | -             | 91.9        | 91.9             | 93.8        | 90.1        |             |
|                              |          | 45-54 years           | 90.2             | 89.9        | 90.7                | 89.4        | 90.3             | 89.8        | 79.8        | 89.7        | 84.8        | 89.6            | -             | 83.5        | 83.4             | 81.2        | 87.1        |             |
|                              |          | 55-64 years           | 84.8             | 86.6        | 82.3                | 82.7        | 80.0             | 90.4        | 82.8        | 81.3        | 81.7        | 90.2            | -             | 77.0        | 77.0             | 79.9        | 75.9        |             |
|                              |          | 65-74 years           | 70.4             | 71.5        | 69.1                | 75.6        | 78.6             | 78.6        | 75.8        | 74.4        | 68.4        | 77.6            | -             | 61.1        | 61.5             | 71.0        | 50.8        |             |
|                              |          | 75-99 years           | 48.0             | 51.3        | 43.7                | 51.8        | 43.4             | 48.6        | 58.6        | 53.3        | 43.5        | 47.5            | -             | 36.5        | 36.5             | 33.2        | 38.0        |             |
|                              |          | Five years            | Age-standardised | <b>37.1</b> | <b>39.6</b>         | <b>34.1</b> | <b>38.4</b>      | <b>34.9</b> | <b>37.8</b> | <b>37.1</b> | <b>39.1</b> | <b>33.7</b>     | <b>40.2</b>   | -           | <b>34.3</b>      | <b>34.3</b> | <b>37.8</b> | <b>33.8</b> |
|                              |          |                       | 15-44 years      | 66.2        | 68.1                | 63.8        | 73.9             | 76.4        | 67.7        | 85.5        | 73.7        | 76.3            | 74.0          | -           | 77.7             | 77.6        | 80.7        | 76.3        |
|                              |          |                       | 45-54 years      | 57.1        | 59.9                | 53.2        | 57.3             | 62.0        | 59.4        | 50.9        | 56.3        | 54.0            | 56.2          | -           | 51.4             | 51.3        | 46.9        | 55.0        |
|                              |          |                       | 55-64 years      | 46.5        | 46.4                | 46.6        | 43.1             | 41.5        | 48.6        | 39.1        | 42.3        | 39.2            | 49.1          | -           | 41.0             | 40.8        | 45.8        | 41.1        |
|                              |          |                       | 65-74 years      | 31.3        | 34.8                | 26.9        | 34.2             | 28.8        | 28.4        | 36.9        | 36.1        | 28.2            | 38.6          | -           | 28.9             | 28.8        | 41.4        | 24.1        |
|                              |          |                       | 75-99 years      | 20.2        | 23.7                | 16.2        | 22.5             | 14.5        | 22.5        | 18.3        | 24.1        | 16.3            | 19.9          | -           | 17.0             | 17.0        | 13.7        | 18.6        |
|                              |          | Conditional 5-year    | No. of patients  | 1,466       | 848                 | 618         | 3,732            | 410         | 629         | 202         | 2,491       | 1,296           | 1,107         | -           | 11,556           | 10,482      | 366         | 708         |
|                              |          | Age-standardised      | <b>50.4</b>      | <b>53.0</b> | <b>47.0</b>         | <b>50.9</b> | <b>46.4</b>      | <b>49.1</b> | <b>48.1</b> | <b>52.2</b> | <b>47.2</b> | <b>52.2</b>     | -             | <b>52.8</b> | <b>52.6</b>      | <b>55.0</b> | <b>53.9</b> |             |
|                              |          | 15-44 years           | 72.3             | 74.1        | 69.9                | 78.8        | 83.8             | 70.1        | 92.2        | 78.6        | 82.3        | 79.5            | -             | 84.6        | 84.5             | 86.0        | 84.7        |             |
|                              |          | 45-54 years           | 63.3             | 66.7        | 58.6                | 64.1        | 68.6             | 66.1        | 63.8        | 62.8        | 63.6        | 62.8            | -             | 61.6        | 61.6             | 57.8        | 63.2        |             |
|                              |          | 55-64 years           | 54.8             | 53.6        | 56.6                | 52.1        | 51.8             | 53.8        | 47.2        | 52.0        | 47.9        | 54.4            | -             | 53.2        | 53.0             | 57.3        | 54.2        |             |
|                              |          | 65-74 years           | 44.5             | 48.7        | 39.0                | 45.3        | 36.7             | 36.1        | 48.7        | 48.5        | 41.3        | 49.8            | -             | 47.3        | 46.8             | 58.3        | 47.5        |             |
|                              |          | 75-99 years           | 42.2             | 46.1        | 37.0                | 43.4        | 33.5             | 46.3        | 31.2        | 45.2        | 37.4        | 41.9            | -             | 46.7        | 46.6             | 41.3        | 48.8        |             |

Some age-standardised estimates arise from imputed age-specific estimates (see text)

Patients included in conditional five-year survival estimates are those who survived at least one year after diagnosis (see text)

Patients included in the period analysis are those who were diagnosed during 2005-07, or diagnosed earlier but alive on 1 January 2005 (see text and Figure 1 in *The Lancet* article)

**Table 14: Number of patients, age-standardised and age-specific relative survival estimates (%) at one and five years, and at 5 years conditional on survival to the first anniversary of diagnosis: cancer and jurisdiction, period analysis for 2005-07**

|                                    | Australia             |                 |             | Canada              |             |                  |             |             | Denmark     | Norway      | Swedish regions | United Kingdom |             |                  |             |             |
|------------------------------------|-----------------------|-----------------|-------------|---------------------|-------------|------------------|-------------|-------------|-------------|-------------|-----------------|----------------|-------------|------------------|-------------|-------------|
|                                    | Australian registries | New South Wales | Victoria    | Canadian registries | Alberta     | British Columbia | Manitoba    | Ontario     |             |             |                 | UK registries  | England     | Northern Ireland | Wales       |             |
| <b>Colorectal cancer (persons)</b> |                       |                 |             |                     |             |                  |             |             |             |             |                 |                |             |                  |             |             |
| One year                           | No. of patients       | 37,201          | 21,111      | 16,090              | 56,084      | 7,192            | 11,522      | 3,378       | 33,992      | 18,018      | 15,760          | 9,950          | 143,643     | 130,047          | 4,540       | 9,056       |
|                                    | Age-standardised      | <b>84.9</b>     | <b>84.7</b> | <b>85.1</b>         | <b>83.5</b> | <b>80.4</b>      | <b>84.3</b> | <b>82.1</b> | <b>83.9</b> | <b>77.7</b> | <b>82.4</b>     | <b>83.8</b>    | <b>74.7</b> | <b>74.7</b>      | <b>76.2</b> | <b>73.6</b> |
|                                    | 15-44 years           | 89.5            | 87.1        | 92.2                | 92.1        | 90.2             | 91.7        | 90.9        | 92.8        | 87.9        | 89.3            | 85.1           | 82.6        | 82.5             | 82.6        | 84.2        |
|                                    | 45-54 years           | 90.4            | 90.3        | 90.5                | 89.1        | 86.4             | 90.3        | 88.3        | 89.5        | 86.5        | 88.6            | 90.0           | 83.8        | 83.9             | 86.8        | 80.2        |
|                                    | 55-64 years           | 89.5            | 89.0        | 90.3                | 87.9        | 84.9             | 88.6        | 87.6        | 88.4        | 83.6        | 86.6            | 86.7           | 81.5        | 81.6             | 82.3        | 79.6        |
|                                    | 65-74 years           | 86.4            | 86.7        | 85.9                | 84.5        | 81.3             | 85.5        | 81.2        | 85.0        | 80.8        | 83.8            | 84.5           | 76.6        | 76.6             | 78.4        | 74.9        |
|                                    | 75-99 years           | 76.4            | 76.5        | 76.3                | 74.5        | 71.2             | 75.5        | 73.8        | 74.9        | 63.7        | 73.3            | 77.9           | 61.8        | 61.8             | 63.3        | 62.1        |
| Five years                         | Age-standardised      | <b>65.9</b>     | <b>66.4</b> | <b>65.5</b>         | <b>63.7</b> | <b>58.3</b>      | <b>64.0</b> | <b>63.3</b> | <b>64.9</b> | <b>55.8</b> | <b>62.0</b>     | <b>62.6</b>    | <b>53.6</b> | <b>53.7</b>      | <b>55.2</b> | <b>52.3</b> |
|                                    | 15-44 years           | 71.2            | 69.4        | 73.4                | 68.8        | 64.3             | 68.3        | 74.1        | 69.2        | 62.3        | 69.6            | 66.0           | 59.3        | 59.1             | 59.0        | 62.8        |
|                                    | 45-54 years           | 68.1            | 68.0        | 68.3                | 66.1        | 66.2             | 66.2        | 64.3        | 66.1        | 61.6        | 63.0            | 63.0           | 58.1        | 58.3             | 53.2        | 58.4        |
|                                    | 55-64 years           | 68.5            | 67.2        | 70.4                | 67.4        | 61.1             | 67.3        | 67.3        | 68.8        | 57.8        | 63.5            | 66.2           | 58.3        | 58.6             | 56.7        | 53.9        |
|                                    | 65-74 years           | 68.2            | 69.1        | 67.0                | 65.6        | 61.8             | 66.4        | 62.9        | 66.5        | 58.1        | 63.6            | 63.3           | 55.8        | 55.7             | 59.0        | 54.6        |
|                                    | 75-99 years           | 59.5            | 61.5        | 57.0                | 56.7        | 47.8             | 56.9        | 57.4        | 58.7        | 47.9        | 57.1            | 58.3           | 44.5        | 44.4             | 50.1        | 43.8        |
| Conditional 5-year                 | No. of patients       | 25,520          | 14,424      | 11,096              | 38,196      | 4,832            | 7,908       | 2,240       | 23,216      | 11,397      | 10,566          | 6,877          | 88,269      | 80,040           | 2,763       | 5,466       |
|                                    | Age-standardised      | <b>77.7</b>     | <b>78.4</b> | <b>76.8</b>         | <b>76.4</b> | <b>72.3</b>      | <b>75.9</b> | <b>77.1</b> | <b>77.4</b> | <b>72.1</b> | <b>75.4</b>     | <b>74.8</b>    | <b>71.8</b> | <b>71.8</b>      | <b>73.0</b> | <b>71.1</b> |
|                                    | 15-44 years           | 79.6            | 79.6        | 79.6                | 74.6        | 71.2             | 74.5        | 81.5        | 74.6        | 70.9        | 77.9            | 77.5           | 71.8        | 71.6             | 71.4        | 74.6        |
|                                    | 45-54 years           | 75.4            | 75.4        | 75.4                | 74.1        | 76.7             | 73.3        | 72.9        | 73.8        | 71.2        | 71.0            | 69.9           | 69.4        | 69.5             | 61.3        | 72.7        |
|                                    | 55-64 years           | 76.5            | 75.5        | 78.0                | 76.7        | 72.0             | 76.0        | 76.8        | 77.8        | 69.1        | 73.3            | 76.4           | 71.5        | 71.9             | 68.9        | 67.6        |
|                                    | 65-74 years           | 79.0            | 79.7        | 78.0                | 77.7        | 76.0             | 77.6        | 77.4        | 78.2        | 71.9        | 75.9            | 74.9           | 72.8        | 72.7             | 75.3        | 72.9        |
|                                    | 75-99 years           | 77.8            | 80.4        | 74.6                | 76.1        | 67.2             | 75.3        | 77.8        | 78.4        | 75.2        | 77.9            | 74.8           | 72.0        | 71.9             | 79.2        | 70.5        |
| <b>Lung cancer (persons)</b>       |                       |                 |             |                     |             |                  |             |             |             |             |                 |                |             |                  |             |             |
| One year                           | No. of patients       | 21,101          | 12,113      | 8,988               | 49,678      | 6,536            | 10,321      | 3,186       | 29,635      | 15,419      | 9,146           | 5,188          | 120,796     | 109,526          | 3,494       | 7,776       |
|                                    | Age-standardised      | <b>42.8</b>     | <b>42.9</b> | <b>42.7</b>         | <b>43.1</b> | <b>41.5</b>      | <b>43.0</b> | <b>42.7</b> | <b>43.4</b> | <b>34.9</b> | <b>39.2</b>     | <b>43.6</b>    | <b>29.7</b> | <b>29.7</b>      | <b>30.6</b> | <b>28.5</b> |
|                                    | 15-44 years           | 62.2            | 61.1        | 63.7                | 58.0        | 59.6             | 61.7        | 61.6        | 56.6        | 41.6        | 54.0            | 64.1           | 43.6        | 43.8             | 45.2        | 38.3        |
|                                    | 45-54 years           | 48.3            | 48.6        | 48.0                | 47.6        | 44.6             | 47.8        | 48.1        | 47.9        | 45.0        | 47.6            | 44.3           | 36.2        | 36.1             | 37.4        | 36.9        |
|                                    | 55-64 years           | 49.7            | 50.3        | 48.7                | 46.8        | 44.1             | 46.1        | 45.4        | 47.6        | 40.4        | 44.0            | 46.4           | 34.4        | 34.5             | 33.9        | 32.7        |
|                                    | 65-74 years           | 42.5            | 42.8        | 42.0                | 43.0        | 40.7             | 43.2        | 40.8        | 43.6        | 36.4        | 40.7            | 43.8           | 29.8        | 29.9             | 30.1        | 28.5        |
|                                    | 75-99 years           | 30.8            | 30.4        | 31.3                | 34.7        | 34.7             | 33.9        | 35.7        | 34.7        | 23.4        | 26.9            | 35.8           | 19.7        | 19.7             | 22.1        | 19.3        |
| Five years                         | Age-standardised      | <b>17.0</b>     | <b>17.6</b> | <b>16.2</b>         | <b>18.4</b> | <b>15.1</b>      | <b>17.7</b> | <b>20.1</b> | <b>19.1</b> | <b>10.9</b> | <b>14.4</b>     | <b>16.3</b>    | <b>8.8</b>  | <b>8.7</b>       | <b>11.0</b> | <b>9.0</b>  |
|                                    | 15-44 years           | 34.1            | 32.4        | 36.3                | 31.8        | 27.1             | 30.4        | 20.4        | 33.6        | 19.2        | 35.1            | 38.1           | 20.4        | 20.1             | 30.5        | 18.1        |
|                                    | 45-54 years           | 19.0            | 20.4        | 17.2                | 21.6        | 19.7             | 20.6        | 21.3        | 22.3        | 15.5        | 19.1            | 15.7           | 12.0        | 11.8             | 14.6        | 13.9        |
|                                    | 55-64 years           | 20.2            | 20.6        | 19.7                | 20.8        | 17.9             | 20.4        | 23.8        | 21.2        | 12.6        | 16.2            | 16.9           | 10.4        | 10.3             | 12.0        | 11.1        |
|                                    | 65-74 years           | 16.4            | 17.6        | 14.8                | 17.7        | 13.6             | 17.6        | 20.7        | 18.3        | 10.6        | 13.5            | 15.4           | 8.1         | 8.1              | 9.5         | 7.6         |
|                                    | 75-99 years           | 10.0            | 10.4        | 9.5                 | 12.8        | 9.5              | 11.4        | 16.0        | 13.6        | 5.9         | 7.1             | 11.8           | 4.1         | 4.1              | 5.4         | 4.5         |
| Conditional 5-year                 | No. of patients       | 7,958           | 4,566       | 3,392               | 19,163      | 2,447            | 3,806       | 1,276       | 11,634      | 4,995       | 3,206           | 1,993          | 33,157      | 30,105           | 993         | 2,059       |
|                                    | Age-standardised      | <b>38.6</b>     | <b>40.1</b> | <b>36.6</b>         | <b>42.1</b> | <b>35.4</b>      | <b>40.3</b> | <b>47.4</b> | <b>43.5</b> | <b>30.3</b> | <b>35.0</b>     | <b>36.5</b>    | <b>28.2</b> | <b>27.9</b>      | <b>33.8</b> | <b>30.2</b> |
|                                    | 15-44 years           | 54.9            | 53.1        | 57.0                | 54.7        | 45.5             | 49.3        | 33.1        | 59.3        | 46.2        | 64.9            | 59.4           | 46.8        | 45.9             | 67.5        | 47.3        |
|                                    | 45-54 years           | 39.3            | 42.0        | 35.9                | 45.5        | 44.2             | 43.1        | 44.2        | 46.6        | 34.4        | 40.0            | 35.4           | 33.1        | 32.6             | 39.0        | 37.5        |
|                                    | 55-64 years           | 40.7            | 41.0        | 40.5                | 44.4        | 40.5             | 44.2        | 52.6        | 44.5        | 31.1        | 36.7            | 36.4           | 30.3        | 29.9             | 35.3        | 33.8        |
|                                    | 65-74 years           | 38.6            | 41.1        | 35.2                | 41.2        | 33.4             | 40.6        | 50.7        | 42.0        | 29.1        | 33.1            | 35.0           | 27.2        | 27.1             | 31.5        | 26.7        |
|                                    | 75-99 years           | 32.6            | 34.4        | 30.4                | 36.8        | 27.5             | 33.6        | 44.9        | 39.0        | 25.3        | 26.4            | 33.0           | 21.1        | 20.8             | 24.5        | 23.6        |

**Table 14: Number of patients, age-standardised and age-specific relative survival estimates (%) at one and five years, and at 5 years conditional on survival to the first anniversary of diagnosis: cancer and jurisdiction, period analysis for 2005-07**

|                              | Australia             |                 |             | Canada              |             |                  |             |             | Denmark     | Norway      | Swedish regions | United Kingdom |             |                  |             |             |
|------------------------------|-----------------------|-----------------|-------------|---------------------|-------------|------------------|-------------|-------------|-------------|-------------|-----------------|----------------|-------------|------------------|-------------|-------------|
|                              | Australian registries | New South Wales | Victoria    | Canadian registries | Alberta     | British Columbia | Manitoba    | Ontario     |             |             |                 | UK registries  | England     | Northern Ireland | Wales       |             |
| <b>Breast cancer (women)</b> |                       |                 |             |                     |             |                  |             |             |             |             |                 |                |             |                  |             |             |
| One year                     | No. of patients       | 35,988          | 20,736      | 15,252              | 64,756      | 9,012            | 13,349      | 3,660       | 38,735      | 20,347      | 14,121          | 13,416         | 197,184     | 180,426          | 5,312       | 11,446      |
|                              | Age-standardised      | <b>96.7</b>     | <b>96.5</b> | <b>97.1</b>         | <b>96.3</b> | <b>95.9</b>      | <b>97.1</b> | <b>96.7</b> | <b>96.1</b> | <b>95.0</b> | <b>96.6</b>     | <b>98.0</b>    | <b>94.2</b> | <b>94.3</b>      | <b>95.0</b> | <b>93.4</b> |
|                              | 15-44 years           | 98.7            | 98.6        | 98.7                | 98.5        | 98.1             | 98.8        | 96.6        | 98.6        | 99.1        | 98.1            | 99.4           | 98.2        | 98.2             | 97.7        | 97.9        |
|                              | 45-54 years           | 98.8            | 98.5        | 99.2                | 98.2        | 98.2             | 99.1        | 98.6        | 97.9        | 98.2        | 99.3            | 99.1           | 98.2        | 98.2             | 98.0        | 98.1        |
|                              | 55-64 years           | 98.7            | 98.6        | 98.7                | 97.7        | 97.4             | 98.0        | 97.3        | 97.7        | 97.9        | 98.5            | 99.1           | 97.5        | 97.5             | 98.7        | 97.4        |
|                              | 65-74 years           | 97.5            | 97.7        | 97.4                | 97.2        | 97.3             | 97.1        | 98.1        | 97.1        | 95.9        | 97.8            | 98.1           | 96.1        | 96.1             | 96.1        | 95.4        |
|                              | 75-99 years           | 93.1            | 92.2        | 94.3                | 93.1        | 91.7             | 95.1        | 94.2        | 92.6        | 89.5        | 92.3            | 96.3           | 87.2        | 87.2             | 89.2        | 85.0        |
| Five years                   | Age-standardised      | <b>88.1</b>     | <b>87.8</b> | <b>88.5</b>         | <b>86.3</b> | <b>82.6</b>      | <b>89.1</b> | <b>86.8</b> | <b>86.4</b> | <b>82.4</b> | <b>85.5</b>     | <b>88.5</b>    | <b>81.6</b> | <b>81.6</b>      | <b>84.1</b> | <b>81.0</b> |
|                              | 15-44 years           | 87.9            | 87.9        | 87.9                | 87.0        | 89.2             | 87.3        | 83.5        | 86.5        | 87.4        | 85.1            | 91.4           | 84.1        | 84.1             | 83.4        | 83.9        |
|                              | 45-54 years           | 90.5            | 90.5        | 90.4                | 89.4        | 89.2             | 90.5        | 91.6        | 88.9        | 88.5        | 91.4            | 91.9           | 88.3        | 88.4             | 85.5        | 89.0        |
|                              | 55-64 years           | 91.5            | 92.0        | 90.8                | 89.0        | 88.0             | 89.9        | 88.4        | 89.0        | 86.6        | 91.6            | 92.1           | 88.8        | 88.8             | 87.3        | 88.9        |
|                              | 65-74 years           | 90.6            | 91.2        | 89.7                | 88.8        | 86.1             | 90.8        | 89.4        | 88.8        | 83.8        | 88.6            | 90.5           | 84.5        | 84.4             | 86.5        | 84.1        |
|                              | 75-99 years           | 82.1            | 79.9        | 84.9                | 80.3        | 70.3             | 86.7        | 81.9        | 80.7        | 73.9        | 75.1            | 81.4           | 69.8        | 69.6             | 78.7        | 67.5        |
| Conditional 5-year           | No. of patients       | 27,975          | 16,137      | 11,838              | 49,797      | 6,953            | 10,256      | 2,807       | 29,781      | 15,582      | 11,023          | 10,496         | 150,852     | 138,152          | 4,026       | 8,674       |
|                              | Age-standardised      | <b>91.0</b>     | <b>90.9</b> | <b>91.2</b>         | <b>89.6</b> | <b>86.0</b>      | <b>91.8</b> | <b>89.7</b> | <b>89.8</b> | <b>86.6</b> | <b>88.4</b>     | <b>90.2</b>    | <b>86.4</b> | <b>86.4</b>      | <b>88.9</b> | <b>86.4</b> |
|                              | 15-44 years           | 89.1            | 89.1        | 89.1                | 88.3        | 90.9             | 88.4        | 86.4        | 87.8        | 88.2        | 86.7            | 91.9           | 85.6        | 85.6             | 85.3        | 85.7        |
|                              | 45-54 years           | 91.6            | 92.0        | 91.1                | 91.1        | 90.9             | 91.4        | 92.9        | 90.9        | 90.1        | 92.1            | 92.7           | 90.0        | 90.0             | 87.2        | 90.7        |
|                              | 55-64 years           | 92.7            | 93.2        | 92.0                | 91.1        | 90.4             | 91.8        | 90.9        | 91.1        | 88.5        | 92.9            | 93.0           | 91.0        | 91.1             | 88.5        | 91.2        |
|                              | 65-74 years           | 92.8            | 93.4        | 92.1                | 91.4        | 88.5             | 93.5        | 91.1        | 91.5        | 87.3        | 90.7            | 92.3           | 87.9        | 87.8             | 90.0        | 88.2        |
|                              | 75-99 years           | 88.2            | 86.6        | 90.3                | 86.2        | 76.7             | 91.2        | 86.9        | 87.1        | 82.6        | 81.3            | 84.5           | 80.1        | 79.8             | 89.8        | 79.4        |
| <b>Ovarian cancer</b>        |                       |                 |             |                     |             |                  |             |             |             |             |                 |                |             |                  |             |             |
| One year                     | No. of patients       | 3,539           | 2,013       | 1,526               | 8,313       | 863              | 1,372       | 434         | 5,644       | 2,690       | 2,192           | -              | 26,877      | 24,355           | 825         | 1,697       |
|                              | Age-standardised      | <b>73.5</b>     | <b>73.3</b> | <b>73.7</b>         | <b>75.2</b> | <b>69.7</b>      | <b>77.6</b> | <b>68.0</b> | <b>75.9</b> | <b>70.6</b> | <b>75.2</b>     | -              | <b>65.0</b> | <b>65.4</b>      | <b>63.9</b> | <b>60.5</b> |
|                              | 15-44 years           | 91.8            | 92.1        | 91.3                | 92.6        | 86.0             | 94.0        | 90.0        | 93.3        | 92.0        | 92.5            | -              | 93.0        | 93.0             | 97.3        | 90.0        |
|                              | 45-54 years           | 91.9            | 93.7        | 88.9                | 90.4        | 95.4             | 91.8        | 82.1        | 89.7        | 91.9        | 88.5            | -              | 83.8        | 83.9             | 87.2        | 80.5        |
|                              | 55-64 years           | 86.7            | 87.5        | 85.6                | 84.9        | 83.0             | 88.2        | 79.1        | 84.7        | 80.6        | 89.8            | -              | 79.1        | 79.8             | 71.3        | 73.9        |
|                              | 65-74 years           | 77.9            | 77.5        | 78.3                | 79.3        | 69.0             | 83.8        | 72.9        | 80.0        | 72.4        | 80.1            | -              | 65.9        | 66.1             | 64.3        | 62.9        |
|                              | 75-99 years           | 46.6            | 44.9        | 49.1                | 52.8        | 45.4             | 53.1        | 43.1        | 54.8        | 46.7        | 49.0            | -              | 38.5        | 38.9             | 39.9        | 32.2        |
| Five years                   | Age-standardised      | <b>37.5</b>     | <b>39.9</b> | <b>34.2</b>         | <b>41.9</b> | <b>36.9</b>      | <b>44.1</b> | <b>28.8</b> | <b>43.2</b> | <b>36.1</b> | <b>39.7</b>     | -              | <b>36.4</b> | <b>36.4</b>      | <b>36.5</b> | <b>36.3</b> |
|                              | 15-44 years           | 69.8            | 72.8        | 66.1                | 75.8        | 65.6             | 74.4        | 72.1        | 77.8        | 72.9        | 76.1            | -              | 79.4        | 79.1             | 86.3        | 80.2        |
|                              | 45-54 years           | 58.2            | 62.1        | 52.5                | 60.7        | 64.6             | 62.6        | 47.2        | 60.5        | 56.0        | 56.9            | -              | 54.0        | 53.8             | 53.1        | 57.1        |
|                              | 55-64 years           | 41.8            | 42.1        | 41.1                | 47.3        | 42.0             | 47.8        | 31.1        | 49.3        | 40.4        | 46.9            | -              | 42.2        | 42.2             | 34.3        | 45.5        |
|                              | 65-74 years           | 38.6            | 41.1        | 35.2                | 38.9        | 32.7             | 43.3        | 28.6        | 39.6        | 34.5        | 38.4            | -              | 32.4        | 32.5             | 34.1        | 29.8        |
|                              | 75-99 years           | 16.6            | 19.8        | 12.3                | 24.7        | 18.7             | 26.8        | 9.2         | 26.6        | 17.1        | 19.4            | -              | 18.0        | 18.0             | 21.7        | 16.4        |
| Conditional 5-year           | No. of patients       | 2,303           | 1,312       | 991                 | 5,466       | 563              | 915         | 274         | 3,714       | 1,720       | 1,467           | -              | 16,350      | 14,825           | 532         | 993         |
|                              | Age-standardised      | <b>48.7</b>     | <b>52.7</b> | <b>43.5</b>         | <b>54.4</b> | <b>50.8</b>      | <b>55.8</b> | <b>39.1</b> | <b>55.7</b> | <b>48.8</b> | <b>50.9</b>     | -              | <b>53.8</b> | <b>53.5</b>      | <b>55.7</b> | <b>57.4</b> |
|                              | 15-44 years           | 76.0            | 79.1        | 72.3                | 81.9        | 76.3             | 79.2        | 80.1        | 83.4        | 79.3        | 82.2            | -              | 85.4        | 85.0             | 88.7        | 89.1        |
|                              | 45-54 years           | 63.4            | 66.3        | 59.0                | 67.1        | 67.7             | 68.3        | 57.4        | 67.5        | 61.0        | 64.3            | -              | 64.4        | 64.1             | 60.9        | 71.0        |
|                              | 55-64 years           | 48.1            | 48.1        | 48.0                | 55.6        | 50.7             | 54.2        | 39.3        | 58.2        | 50.1        | 52.2            | -              | 53.3        | 53.0             | 48.2        | 61.6        |
|                              | 65-74 years           | 49.6            | 53.0        | 45.0                | 49.0        | 47.3             | 51.7        | 39.3        | 49.5        | 47.6        | 48.0            | -              | 49.2        | 49.2             | 53.0        | 47.4        |
|                              | 75-99 years           | 35.7            | 44.1        | 25.1                | 46.8        | 41.2             | 50.5        | 21.3        | 48.6        | 36.6        | 39.7            | -              | 46.7        | 46.3             | 54.3        | 51.0        |

Some age-standardised estimates arise from imputed age-specific estimates (see text)

Patients included in conditional five-year survival estimates are those who survived at least one year after diagnosis (see text)

Patients included in the period analysis are those who were diagnosed during 2005-07, or diagnosed earlier but alive on 1 January 2005 (see text and Figure 1 in *The Lancet* article)

**Table 15: Age-standardised (world) annual incidence and mortality rates per 100,000 in 2000, with mortality-incidence ratios: cancer and country**

|                                   | Colorectum | Lung  |         |         | Breast  | Ovary |
|-----------------------------------|------------|-------|---------|---------|---------|-------|
|                                   | Persons    | Males | Females | Persons | Females |       |
| <b>Incidence*</b>                 |            |       |         |         |         |       |
| Australia                         | 40.3       | 38.2  | 17.5    | 27.0    | 84.4    | 8.0   |
| Canada <sup>1</sup>               | 35.6       | 47.9  | 31.6    | 38.9    | 80.7    | 9.4   |
| Denmark                           | 33.9       | 46.2  | 31.6    | 37.9    | 83.7    | 13.2  |
| Norway                            | 36.1       | 35.5  | 19.2    | 26.4    | 71.0    | 12.8  |
| Sweden                            | 26.3       | 20.9  | 14.5    | 17.3    | 78.9    | 10.5  |
| UK <sup>2</sup>                   | 29.3       | 43.8  | 22.6    | 31.9    | 82.1    | 11.9  |
| <b>Mortality</b>                  |            |       |         |         |         |       |
| Australia                         | 14.2       | 32.1  | 13.6    | 22.1    | 16.6    | 4.8   |
| Canada                            | 12.2       | 44.5  | 24.8    | 33.5    | 18.3    | 5.4   |
| Denmark                           | 17.8       | 42.6  | 27.6    | 34.1    | 25.2    | 8.7   |
| Norway                            | 16.0       | 31.2  | 15.3    | 22.4    | 16.8    | 7.1   |
| Sweden                            | 11.5       | 21.0  | 13.4    | 16.7    | 15.8    | 6.7   |
| UK <sup>3</sup>                   | 12.7       | 39.5  | 19.9    | 28.4    | 21.5    | 7.7   |
| <b>Mortality/Incidence ratios</b> |            |       |         |         |         |       |
| Australia                         | 0.35       | 0.84  | 0.78    | 0.82    | 0.20    | 0.60  |
| Canada <sup>1</sup>               | 0.34       | 0.93  | 0.78    | 0.86    | 0.23    | 0.57  |
| Denmark                           | 0.53       | 0.92  | 0.87    | 0.90    | 0.30    | 0.66  |
| Norway                            | 0.44       | 0.88  | 0.80    | 0.85    | 0.24    | 0.55  |
| Sweden                            | 0.44       | 1.00  | 0.92    | 0.97    | 0.20    | 0.64  |
| UK                                | 0.43       | 0.90  | 0.88    | 0.89    | 0.26    | 0.65  |

Source for incidence rates around 2000 (1998-2002): Cancer Incidence in Five Continents, vol IX<sup>12</sup>

Source for mortality rates for 2000: WHO mortality databank

<sup>1</sup> Excludes Quebec; <sup>2</sup> England and Northern Ireland only; <sup>3</sup> England and Wales only

\* Colorectal cancer includes cancers of the anus and anal canal; lung cancer includes cancers of the trachea.

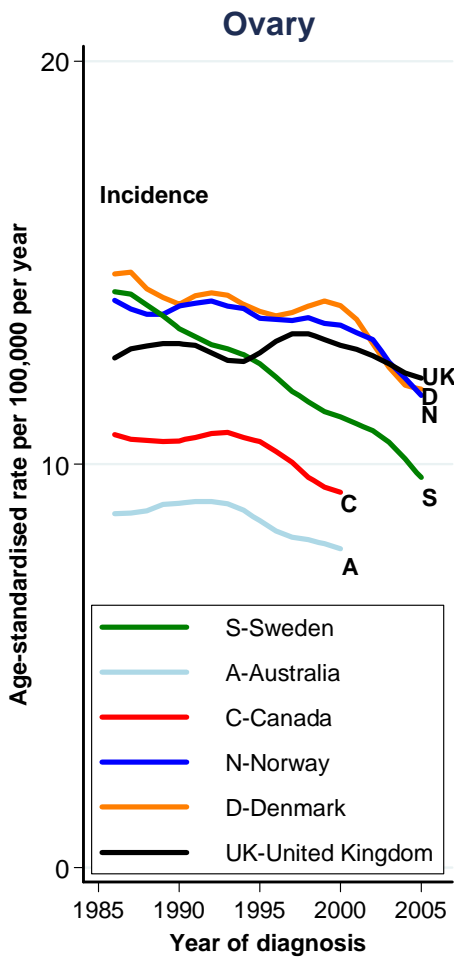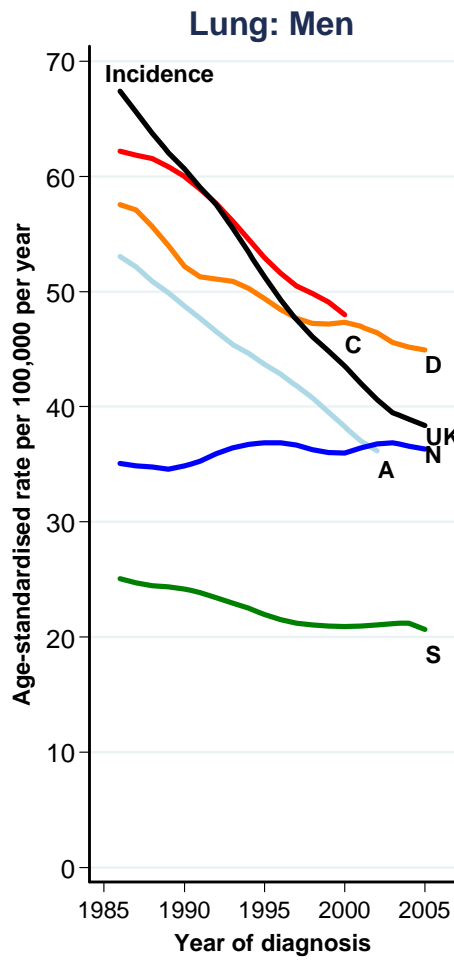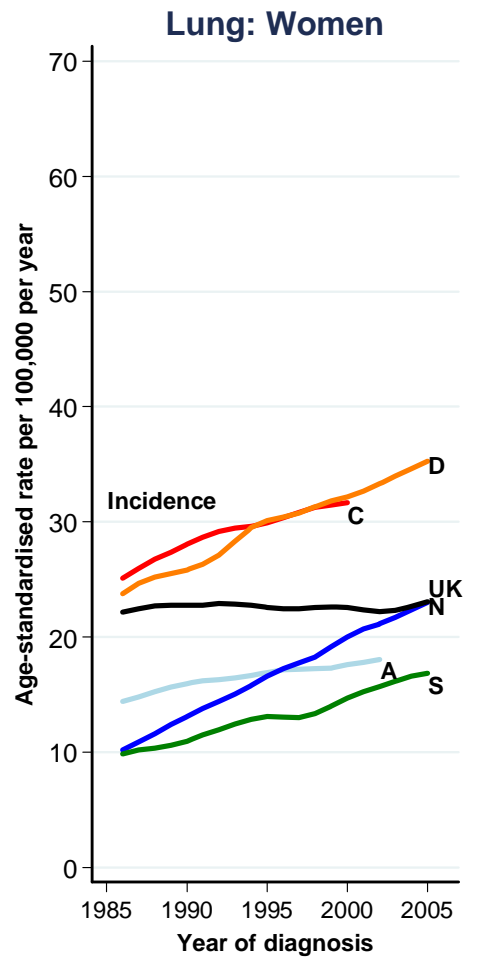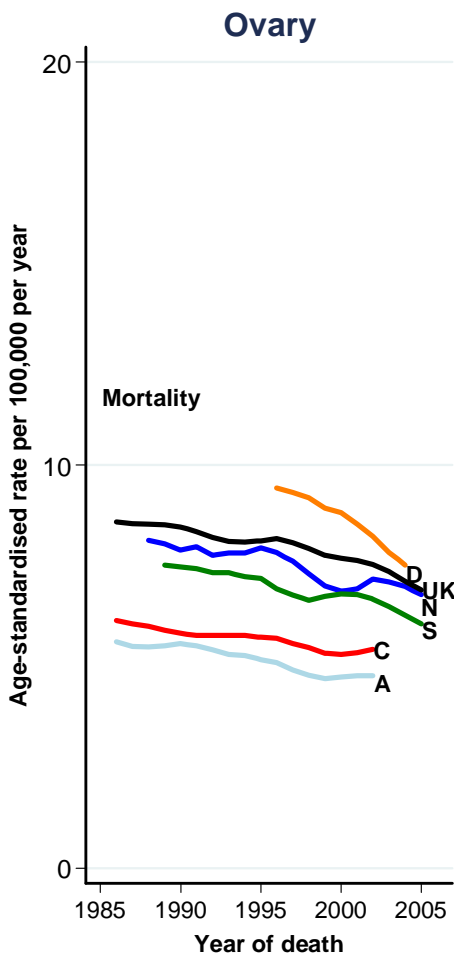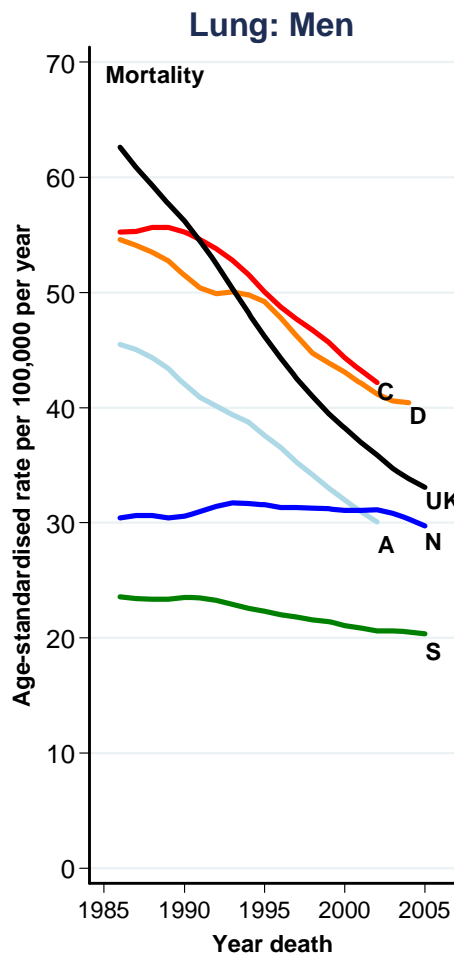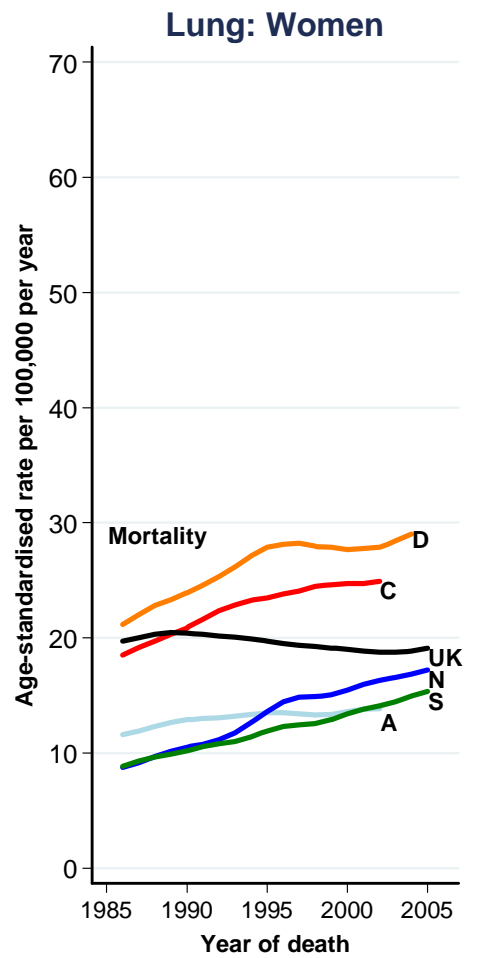

Supplement: mmc1.pdf [file mmc1.pdf]
